# Supplementary material for: Age-related accumulation of de novo mitochondrial mutations in mammalian oocytes and somatic tissues
Source: PLoS Biol. 2020 Jul 15;18(7):e3000745. doi: 10.1371/journal.pbio.3000745 (PMC7363077; doi:10.1371/journal.pbio.3000745)
Supplement: S18 Table — The table contains all putative de novo mutations, independent of the number of samples in which a mutation is found (indicated in the last column). Only mutations occurring in less than four samples were included in the final analysis (see S2 Note). Early somatic mutations (present in both somatic tissues, but absent in the germline) are separately listed in S3 Table. (XLSX) [file pbio.3000745.s037.xlsx]

## Sheet: S18. variants
sample	pedigree	family	mouse_ID	pedigree status	sex	age [days]	tissue	fragmentation	position	major allele	minor allele	depth (DCS)	minor allele count (DCS)	MAF (DCS)	somatic/ germline	gene	synonymous / nonsynonymous	transition (ti) / transversion (tv)	region	nucleotide context	mutation type	n samples in which a mutation is present (G126)	n samples in which a mutation is present (G129)	n samples in which a mutation is present (both pedigrees)
G134_M	G129	G134	G134	mother	female	295	muscle	CV	16	T	C	772	1	0.0013	somatic	TrnF	-	ti	RNA	ATA	T>C	0	1	1
G137_M	G126	G137	G137	mother	female	320	muscle	CV	23	G	A	2225	1	0.0005	somatic	TrnF	-	ti	RNA	AGC	G>A	1	0	1
G133_M	G129	G133	G133	mother	female	308	muscle	CV	48	G	A	2462	1	0.0004	somatic	TrnF	-	ti	RNA	GGA	G>A	0	1	1
G140p7_M	G126	G140	G140p7	pup	female	21	muscle	CV	49	A	G	2037	1	0.0005	somatic	TrnF	-	ti	RNA	GAT	A>G	1	0	1
G132p3_M	G129	G132	G132p3	pup	female	19	muscle	CV	55	G	A	1651	1	0.0006	somatic	TrnF	-	ti	RNA	TGT	G>A	0	1	1
G131_Br	G129	G131	G131	mother	female	291	brain	CV	75	T	G	1902	1	0.0005	somatic	mt-Rnr1	-	tv	RNA	GTT	T>G	0	1	1
G139p2_M	G126	G139	G139p2	pup	female	18	muscle	CV	79	G	A	1443	1	0.0007	somatic	mt-Rnr1	-	ti	RNA	GGT	G>A	1	0	1
G136_Br	G126	G136	G136	mother	female	299	brain	CV	85	G	A	2233	1	0.0005	somatic	mt-Rnr1	-	ti	RNA	GGC	G>A	1	0	1
G139_Oo3	G126	G139	G139	mother	female	316	single oocyte	FS	87	C	A	1048	1	0.001	germline	mt-Rnr1	-	tv	RNA	CCT	C>A	1	0	1
G140p5_Br	G126	G140	G140p5	pup	female	21	brain	CV	101	G	C	2013	1	0.0005	somatic	mt-Rnr1	-	tv	RNA	AGA	G>C	1	0	1
G134_Oo1	G129	G134	G134	mother	female	295	single oocyte	CV	116	A	G	803	1	0.0013	germline	mt-Rnr1	-	ti	RNA	CAT	A>G	0	1	1
G134_Oo_pool	G129	G134	G134	mother	female	295	oocyte pool	CV	122	A	C	233	1	0.0043	germline	mt-Rnr1	-	tv	RNA	AAC	A>C	0	1	1
G133p2_Br	G129	G133	G133p2	pup	male	19	brain	CV	171	G	A	2200	1	0.0005	somatic	mt-Rnr1	-	ti	RNA	AGG	G>A	0	1	1
G132p6_M	G129	G132	G132p6	pup	female	21	muscle	CV	175	A	G	1476	1	0.0007	somatic	mt-Rnr1	-	ti	RNA	GAG	A>G	1	2	3
G133p4_M	G129	G133	G133p4	pup	female	19	muscle	CV	175	A	G	2937	1	0.0003	somatic	mt-Rnr1	-	ti	RNA	GAG	A>G	1	2	3
G140p6_M	G126	G140	G140p6	pup	female	21	muscle	CV	175	A	G	1885	1	0.0005	somatic	mt-Rnr1	-	ti	RNA	GAG	A>G	1	2	3
G133_Br	G129	G133	G133	mother	female	308	brain	CV	178	G	A	1724	1	0.0006	somatic	mt-Rnr1	-	ti	RNA	GGT	G>A	0	1	1
G139_M	G126	G139	G139	mother	female	316	muscle	CV	182	C	T	3588	1	0.0003	somatic	mt-Rnr1	-	ti	RNA	TCA	C>T	1	0	1
G131p3_M	G129	G131	G131p3	pup	female	18	muscle	CV	186	C	A	2579	1	0.0004	somatic	mt-Rnr1	-	tv	RNA	GCA	C>A	0	1	1
G131_M	G129	G131	G131	mother	female	291	muscle	CV	204	G	A	861	1	0.0012	somatic	mt-Rnr1	-	ti	RNA	AGA	G>A	0	1	1
G137p1_M	G126	G137	G137p1	pup	male	17	muscle	CV	212	G	A	910	1	0.0011	somatic	mt-Rnr1	-	ti	RNA	TGC	G>A	1	0	1
G132p4_Br	G129	G132	G132p4	pup	female	19	brain	CV	218	C	A	1675	1	0.0006	somatic	mt-Rnr1	-	tv	RNA	GCC	C>A	0	1	1
G131p3_M	G129	G131	G131p3	pup	female	18	muscle	CV	231	G	A	2767	1	0.0004	somatic	mt-Rnr1	-	ti	RNA	GGG	G>A	0	1	1
G132p9_M	G129	G132	G132p9	pup	female	21	muscle	CV	233	A	C	1189	1	0.0008	somatic	mt-Rnr1	-	tv	RNA	GAC	A>C	0	1	1
G131p1_M	G129	G131	G131p1	pup	male	18	muscle	CV	252	T	A	1178	2	0.0017	somatic	mt-Rnr1	-	tv	RNA	TTA	T>A	0	1	1
G132p2_M	G129	G132	G132p2	pup	male	19	muscle	CV	278	G	A	2814	1	0.0004	somatic	mt-Rnr1	-	ti	RNA	AGT	G>A	0	1	1
G139_M	G126	G139	G139	mother	female	316	muscle	CV	292	G	A	3448	1	0.0003	somatic	mt-Rnr1	-	ti	RNA	GGG	G>A	1	0	1
G133p3_Br	G129	G133	G133p3	pup	female	19	brain	CV	297	G	A	3700	1	0.0003	somatic	mt-Rnr1	-	ti	RNA	GGT	G>A	0	1	1
G131_Oo5	G129	G131	G131	mother	female	291	single oocyte	FS	298	T	C	185	1	0.0054	germline	mt-Rnr1	-	ti	RNA	GTA	T>C	0	1	1
G140p6_Oo_pool	G126	G140	G140p6	pup	female	21	oocyte pool	CV	317	C	A	1004	1	0.001	germline	mt-Rnr1	-	tv	RNA	CCG	C>A	1	0	1
G137p5_M	G126	G137	G137p5	pup	female	18	muscle	CV	318	G	T	2659	1	0.0004	somatic	mt-Rnr1	-	tv	RNA	CGC	G>T	1	0	1
G140p6_Br	G126	G140	G140p6	pup	female	21	brain	CV	328	G	T	3918	1	0.0003	somatic	mt-Rnr1	-	tv	RNA	CGA	G>T	1	0	1
G140p1_Br	G126	G140	G140p1	pup	male	21	brain	CV	344	T	A	3976	1	0.0003	somatic	mt-Rnr1	-	tv	RNA	ATT	T>A	1	0	1
G132p7_Oo_pool	G129	G132	G132p7	pup	female	21	oocyte pool	CV	344	T	C	1414	1	0.0007	germline	mt-Rnr1	-	ti	RNA	ATT	T>C	0	1	1
G131_Br	G129	G131	G131	mother	female	291	brain	CV	353	G	T	1745	1	0.0006	somatic	mt-Rnr1	-	tv	RNA	GGC	G>T	0	1	1
G140p1_Br	G126	G140	G140p1	pup	male	21	brain	CV	364	G	T	3930	1	0.0003	somatic	mt-Rnr1	-	tv	RNA	TGT	G>T	1	0	1
G133p3_Br	G129	G133	G133p3	pup	female	19	brain	CV	366	C	T	3436	1	0.0003	somatic	mt-Rnr1	-	ti	RNA	TCA	C>T	0	1	1
G137_M	G126	G137	G137	mother	female	320	muscle	CV	396	C	A	2122	1	0.0005	somatic	mt-Rnr1	-	tv	RNA	TCC	C>A	1	0	1
G136_Br	G126	G136	G136	mother	female	299	brain	CV	407	G	T	2324	1	0.0004	somatic	mt-Rnr1	-	tv	RNA	TGT	G>T	1	0	1
G133_Br	G129	G133	G133	mother	female	308	brain	CV	420	G	A	1982	1	0.0005	somatic	mt-Rnr1	-	ti	RNA	TGT	G>A	0	1	1
G137p2_Br	G126	G137	G137p2	pup	female	17	brain	CV	425	G	A	2942	1	0.0003	somatic	mt-Rnr1	-	ti	RNA	GGA	G>A	2	0	2
G140_M	G126	G140	G140	mother	female	316	muscle	CV	425	G	A	2765	1	0.0004	somatic	mt-Rnr1	-	ti	RNA	GGA	G>A	2	0	2
G133p1_M	G129	G133	G133p1	pup	male	19	muscle	CV	442	G	T	1052	1	0.001	somatic	mt-Rnr1	-	tv	RNA	CGA	G>T	0	1	1
G132p2_Br	G129	G132	G132p2	pup	male	19	brain	CV	452	C	A	2050	1	0.0005	somatic	mt-Rnr1	-	tv	RNA	TCT	C>A	0	2	2
G134p7_M	G129	G134	G134p7	pup	female	18	muscle	CV	452	C	A	2728	1	0.0004	somatic	mt-Rnr1	-	tv	RNA	TCT	C>A	0	2	2
G133p4_Br	G129	G133	G133p4	pup	female	19	brain	CV	457	C	A	2319	1	0.0004	somatic	mt-Rnr1	-	tv	RNA	TCA	C>A	0	1	1
G131p3_Br	G129	G131	G131p3	pup	female	18	brain	CV	492	G	T	2212	1	0.0005	somatic	mt-Rnr1	-	tv	RNA	GGA	G>T	0	2	2
G133_M	G129	G133	G133	mother	female	308	muscle	CV	492	G	T	2362	1	0.0004	somatic	mt-Rnr1	-	tv	RNA	GGA	G>T	0	2	2
G133_Oo1	G129	G133	G133	mother	female	308	single oocyte	FS	497	G	A	813	1	0.0012	germline	mt-Rnr1	-	ti	RNA	AGA	G>A	0	1	1
G133p1_M	G129	G133	G133p1	pup	male	19	muscle	CV	497	G	T	1015	1	0.001	somatic	mt-Rnr1	-	tv	RNA	AGA	G>T	1	1	2
G140p1_M	G126	G140	G140p1	pup	male	21	muscle	CV	497	G	T	3294	1	0.0003	somatic	mt-Rnr1	-	tv	RNA	AGA	G>T	1	1	2
G133p4_Br	G129	G133	G133p4	pup	female	19	brain	CV	501	C	T	2249	2	0.0009	somatic	mt-Rnr1	-	ti	RNA	ACC	C>T	0	1	1
G133_Oo2	G129	G133	G133	mother	female	308	single oocyte	FS	515	G	A	331	1	0.003	germline	mt-Rnr1	-	ti	RNA	AGC	G>A	1	1	2
G139_Oo3	G126	G139	G139	mother	female	316	single oocyte	FS	515	G	A	1147	1	0.0009	germline	mt-Rnr1	-	ti	RNA	AGC	G>A	1	1	2
G140_Br	G126	G140	G140	mother	female	316	brain	CV	538	T	C	2328	1	0.0004	somatic	mt-Rnr1	-	ti	RNA	TTT	T>C	1	0	1
G139_Br	G126	G139	G139	mother	female	316	brain	CV	565	C	A	3093	1	0.0003	somatic	mt-Rnr1	-	tv	RNA	ACT	C>A	1	0	1
G140p7_Oo3	G126	G140	G140p7	pup	female	21	single oocyte	FS	568	G	T	379	1	0.0026	germline	mt-Rnr1	-	tv	RNA	AGC	G>T	1	0	1
G140_M	G126	G140	G140	mother	female	316	muscle	CV	572	T	C	2939	1	0.0003	somatic	mt-Rnr1	-	ti	RNA	ATA	T>C	1	0	1
G136_M	G126	G136	G136	mother	female	299	muscle	CV	597	G	A	873	1	0.0012	somatic	mt-Rnr1	-	ti	RNA	CGG	CpG>CpA	1	0	1
G140_M	G126	G140	G140	mother	female	316	muscle	CV	597	G	T	2917	1	0.0003	somatic	mt-Rnr1	-	tv	RNA	CGG	G>T	1	0	1
G137p1_Br	G126	G137	G137p1	pup	male	17	brain	CV	619	G	A	2875	1	0.0004	somatic	mt-Rnr1	-	ti	RNA	GGA	G>A	2	0	2
G136_M	G126	G136	G136	mother	female	299	muscle	CV	619	G	A	866	1	0.0012	somatic	mt-Rnr1	-	ti	RNA	GGA	G>A	2	0	2
G132p6_Oo4	G129	G132	G132p6	pup	female	21	single oocyte	FS	635	C	T	200	1	0.005	germline	mt-Rnr1	-	ti	RNA	TCG	CpG>TpG	0	1	1
G134_Oo1	G129	G134	G134	mother	female	295	single oocyte	CV	646	G	A	869	1	0.0012	germline	mt-Rnr1	-	ti	RNA	CGC	CpG>CpA	0	1	1
G139_M	G126	G139	G139	mother	female	316	muscle	CV	657	C	T	3383	1	0.0003	somatic	mt-Rnr1	-	ti	RNA	ACC	C>T	1	0	1
G140_Br	G126	G140	G140	mother	female	316	brain	CV	661	C	A	2124	1	0.0005	somatic	mt-Rnr1	-	tv	RNA	TCT	C>A	1	0	1
G132p8_Br	G129	G132	G132p8	pup	female	21	brain	CV	675	G	A	2834	1	0.0004	somatic	mt-Rnr1	-	ti	RNA	AGC	G>A	0	1	1
G133_Br	G129	G133	G133	mother	female	308	brain	CV	696	G	A	1892	1	0.0005	somatic	mt-Rnr1	-	ti	RNA	AGC	G>A	0	1	1
G139_M	G126	G139	G139	mother	female	316	muscle	CV	697	C	A	3406	1	0.0003	somatic	mt-Rnr1	-	tv	RNA	GCA	C>A	1	0	1
G132p8_Oo_pool	G129	G132	G132p8	pup	female	21	oocyte pool	CV	719	G	A	1038	4	0.0039	germline	mt-Rnr1	-	ti	RNA	AGT	G>A	0	1	1
G139_M	G126	G139	G139	mother	female	316	muscle	CV	723	G	A	3486	1	0.0003	somatic	mt-Rnr1	-	ti	RNA	AGC	G>A	1	0	1
G140_M	G126	G140	G140	mother	female	316	muscle	CV	729	G	A	3175	1	0.0003	somatic	mt-Rnr1	-	ti	RNA	AGA	G>A	1	1	2
G131p3_M	G129	G131	G131p3	pup	female	18	muscle	CV	729	G	T	2704	1	0.0004	somatic	mt-Rnr1	-	tv	RNA	AGA	G>T	0	1	1
G131p3_M	G129	G131	G131p3	pup	female	18	muscle	CV	729	G	A	2704	1	0.0004	somatic	mt-Rnr1	-	ti	RNA	AGA	G>A	1	1	2
G131_Br	G129	G131	G131	mother	female	291	brain	CV	750	G	A	1986	1	0.0005	somatic	mt-Rnr1	-	ti	RNA	AGG	G>A	0	2	2
G133p3_Br	G129	G133	G133p3	pup	female	19	brain	CV	750	G	A	4155	1	0.0002	somatic	mt-Rnr1	-	ti	RNA	AGG	G>A	0	2	2
G132p3_M	G129	G132	G132p3	pup	female	19	muscle	CV	760	T	A	1855	1	0.0005	somatic	mt-Rnr1	-	tv	RNA	GTA	T>A	0	1	1
G132p4_M	G129	G132	G132p4	pup	female	19	muscle	CV	768	G	T	1382	1	0.0007	somatic	mt-Rnr1	-	tv	RNA	TGA	G>T	0	1	1
G131_Oo3	G129	G131	G131	mother	female	291	single oocyte	FS	775	G	A	196	1	0.0051	germline	mt-Rnr1	-	ti	RNA	GGA	G>A	0	1	1
G140_M	G126	G140	G140	mother	female	316	muscle	CV	785	G	T	3223	1	0.0003	somatic	mt-Rnr1	-	tv	RNA	GGC	G>T	1	0	1
G140p7_M	G126	G140	G140p7	pup	female	21	muscle	CV	785	G	A	1895	1	0.0005	somatic	mt-Rnr1	-	ti	RNA	GGC	G>A	1	1	2
G132_Oo1	G129	G132	G132	mother	female	312	single oocyte	FS	785	G	A	370	1	0.0027	germline	mt-Rnr1	-	ti	RNA	GGC	G>A	1	1	2
G131p1_M	G129	G131	G131p1	pup	male	18	muscle	CV	791	T	G	1224	1	0.0008	somatic	mt-Rnr1	-	tv	RNA	ATT	T>G	0	1	1
G133p3_M	G129	G133	G133p3	pup	female	19	muscle	CV	804	G	T	3730	1	0.0003	somatic	mt-Rnr1	-	tv	RNA	AGA	G>T	0	1	1
G139p2_M	G126	G139	G139p2	pup	female	18	muscle	CV	820	T	C	1381	1	0.0007	somatic	mt-Rnr1	-	ti	RNA	CTT	T>C	1	0	1
G131p1_Br	G129	G131	G131p1	pup	male	18	brain	CV	835	G	T	889	1	0.0011	somatic	mt-Rnr1	-	tv	RNA	GGA	G>T	0	1	1
G132p8_Br	G129	G132	G132p8	pup	female	21	brain	CV	841	G	A	3129	1	0.0003	somatic	mt-Rnr1	-	ti	RNA	AGG	G>A	1	1	2
G137_M	G126	G137	G137	mother	female	320	muscle	CV	841	G	A	2510	1	0.0004	somatic	mt-Rnr1	-	ti	RNA	AGG	G>A	1	1	2
G131_Oo4	G129	G131	G131	mother	female	291	single oocyte	FS	842	G	A	233	1	0.0043	germline	mt-Rnr1	-	ti	RNA	GGA	G>A	0	1	1
G140_Br	G126	G140	G140	mother	female	316	brain	CV	854	G	A	2341	1	0.0004	somatic	mt-Rnr1	-	ti	RNA	AGT	G>A	1	0	1
G132p8_M	G129	G132	G132p8	pup	female	21	muscle	CV	873	C	A	1614	1	0.0006	somatic	mt-Rnr1	-	tv	RNA	GCT	C>A	0	1	1
G137p1_Br	G126	G137	G137p1	pup	male	17	brain	CV	887	G	A	3122	1	0.0003	somatic	mt-Rnr1	-	ti	RNA	AGC	G>A	1	0	1
G140_M	G126	G140	G140	mother	female	316	muscle	CV	895	G	A	3242	1	0.0003	somatic	mt-Rnr1	-	ti	RNA	AGT	G>A	1	0	1
G139p1_Br	G126	G139	G139p1	pup	female	18	brain	CV	895	G	T	1266	1	0.0008	somatic	mt-Rnr1	-	tv	RNA	AGT	G>T	1	0	1
G137p5_Br	G126	G137	G137p5	pup	female	18	brain	CV	904	C	T	2572	1	0.0004	somatic	mt-Rnr1	-	ti	RNA	ACA	C>T	1	0	1
G133_Oo_pool	G129	G133	G133	mother	female	308	oocyte pool	CV	919	T	C	1593	5	0.0031	germline	mt-Rnr1	-	ti	RNA	CTC	T>C	0	1	1
G133_Br	G129	G133	G133	mother	female	308	brain	CV	952	T	C	1822	1	0.0006	somatic	mt-Rnr1	-	ti	RNA	TTT	T>C	0	1	1
G137p5_Br	G126	G137	G137p5	pup	female	18	brain	CV	972	G	A	2536	1	0.0004	somatic	mt-Rnr1	-	ti	RNA	AGA	G>A	1	0	1
G134_M	G129	G134	G134	mother	female	295	muscle	CV	975	G	T	732	1	0.0014	somatic	mt-Rnr1	-	tv	RNA	GGA	G>T	0	1	1
G137_Br	G126	G137	G137	mother	female	320	brain	CV	975	G	A	1374	1	0.0007	somatic	mt-Rnr1	-	ti	RNA	GGA	G>A	1	1	2
G134_M	G129	G134	G134	mother	female	295	muscle	CV	975	G	A	732	1	0.0014	somatic	mt-Rnr1	-	ti	RNA	GGA	G>A	1	1	2
G132p1_Br	G129	G132	G132p1	pup	male	19	brain	CV	993	G	A	1213	2	0.0017	somatic	mt-Rnr1	-	ti	RNA	GGT	G>A	1	1	2
G137_M	G126	G137	G137	mother	female	320	muscle	CV	993	G	A	2422	1	0.0004	somatic	mt-Rnr1	-	ti	RNA	GGT	G>A	1	1	2
G139_Br	G126	G139	G139	mother	female	316	brain	CV	997	G	A	3238	1	0.0003	somatic	mt-Rnr1	-	ti	RNA	AGC	G>A	1	0	1
G132_Br	G129	G132	G132	mother	female	312	brain	CV	1009	G	A	731	1	0.0014	somatic	mt-Rnr1	-	ti	RNA	AGT	G>A	0	2	2
G133p4_Br	G129	G133	G133p4	pup	female	19	brain	CV	1009	G	A	2617	1	0.0004	somatic	mt-Rnr1	-	ti	RNA	AGT	G>A	0	2	2
G140_M	G126	G140	G140	mother	female	316	muscle	CV	1011	G	A	3218	1	0.0003	somatic	mt-Rnr1	-	ti	RNA	TGT	G>A	1	0	1
G139p2_Br	G126	G139	G139p2	pup	female	18	brain	CV	1018	G	T	1150	1	0.0009	somatic	mt-Rnr1	-	tv	RNA	GGA	G>T	1	0	1
G140p1_Br	G126	G140	G140p1	pup	male	21	brain	CV	1019	A	G	4219	2	0.0005	somatic	mt-Rnr1	-	ti	RNA	GAA	A>G	1	0	1
G137p3_M	G126	G137	G137p3	pup	female	17	muscle	CV	1029	G	A	1079	1	0.0009	somatic	TrnV	-	ti	RNA	AGT	G>A	2	0	2
G139_M	G126	G139	G139	mother	female	316	muscle	CV	1029	G	A	3695	1	0.0003	somatic	TrnV	-	ti	RNA	AGT	G>A	2	0	2
G136_Br	G126	G136	G136	mother	female	299	brain	CV	1051	C	A	2134	1	0.0005	somatic	TrnV	-	tv	RNA	TCT	C>A	1	0	1
G140p1_M	G126	G140	G140p1	pup	male	21	muscle	CV	1056	C	T	2908	1	0.0003	somatic	TrnV	-	ti	RNA	CCT	C>T	1	0	1
G131p2_Br	G129	G131	G131p2	pup	male	18	brain	CV	1065	G	T	1631	1	0.0006	somatic	TrnV	-	tv	RNA	AGA	G>T	0	1	1
G136_M	G126	G136	G136	mother	female	299	muscle	CV	1081	A	G	738	1	0.0014	somatic	TrnV	-	ti	RNA	AAT	A>G	1	0	1
G137_M	G126	G137	G137	mother	female	320	muscle	CV	1106	C	T	2356	1	0.0004	somatic	mt-Rnr2	-	ti	RNA	CCC	C>T	1	0	1
G131_M	G129	G131	G131	mother	female	291	muscle	CV	1107	C	A	1434	1	0.0007	somatic	mt-Rnr2	-	tv	RNA	CCT	C>A	0	1	1
G131p1_M	G129	G131	G131p1	pup	male	18	muscle	CV	1110	G	A	1148	1	0.0009	somatic	mt-Rnr2	-	ti	RNA	AGC	G>A	0	1	1
G134p7_Oo_pool	G129	G134	G134p7	pup	female	18	oocyte pool	CV	1172	G	A	905	1	0.0011	germline	mt-Rnr2	-	ti	RNA	TGG	G>A	0	1	1
G139p2_Br	G126	G139	G139p2	pup	female	18	brain	CV	1179	G	T	1086	1	0.0009	somatic	mt-Rnr2	-	tv	RNA	AGA	G>T	1	0	1
G133p4_M	G129	G133	G133p4	pup	female	19	muscle	CV	1185	C	A	3486	1	0.0003	somatic	mt-Rnr2	-	tv	RNA	TCG	C>A	0	1	1
G136_M	G126	G136	G136	mother	female	299	muscle	CV	1193	T	C	739	1	0.0014	somatic	mt-Rnr2	-	ti	RNA	CTA	T>C	1	0	1
G131_Br	G129	G131	G131	mother	female	291	brain	CV	1198	G	T	1861	1	0.0005	somatic	mt-Rnr2	-	tv	RNA	AGC	G>T	0	1	1
G140_M	G126	G140	G140	mother	female	316	muscle	CV	1204	G	A	2910	1	0.0003	somatic	mt-Rnr2	-	ti	RNA	AGA	G>A	1	0	1
G132p8_Br	G129	G132	G132p8	pup	female	21	brain	CV	1210	G	A	2578	1	0.0004	somatic	mt-Rnr2	-	ti	RNA	AGT	G>A	0	2	2
G132p2_M	G129	G132	G132p2	pup	male	19	muscle	CV	1210	G	A	2756	1	0.0004	somatic	mt-Rnr2	-	ti	RNA	AGT	G>A	0	2	2
G139p2_Br	G126	G139	G139p2	pup	female	18	brain	CV	1212	A	T	1088	2	0.0018	somatic	mt-Rnr2	-	tv	RNA	TAC	A>T	1	0	1
G140p1_Br	G126	G140	G140p1	pup	male	21	brain	CV	1215	G	A	3980	3	0.0008	somatic	mt-Rnr2	-	ti	RNA	CGC	CpG>CpA	1	0	1
G140_M	G126	G140	G140	mother	female	316	muscle	CV	1215	G	C	2879	1	0.0004	somatic	mt-Rnr2	-	tv	RNA	CGC	G>C	1	0	1
G139_M	G126	G139	G139	mother	female	316	muscle	CV	1220	G	A	3541	1	0.0003	somatic	mt-Rnr2	-	ti	RNA	GGG	G>A	1	1	2
G134_Oo1	G129	G134	G134	mother	female	295	single oocyte	CV	1220	G	A	822	1	0.0012	germline	mt-Rnr2	-	ti	RNA	GGG	G>A	1	1	2
G140p5_M	G126	G140	G140p5	pup	female	21	muscle	CV	1244	G	A	2107	1	0.0005	somatic	mt-Rnr2	-	ti	RNA	AGT	G>A	1	0	1
G133_Br	G129	G133	G133	mother	female	308	brain	CV	1248	G	T	1865	1	0.0005	somatic	mt-Rnr2	-	tv	RNA	AGA	G>T	0	1	1
G132p7_M	G129	G132	G132p7	pup	female	21	muscle	CV	1259	G	A	341	1	0.0029	somatic	mt-Rnr2	-	ti	RNA	AGA	G>A	0	1	1
G136_Oo_pool	G126	G136	G136	mother	female	299	oocyte pool	CV	1279	G	A	2336	1	0.0004	germline	mt-Rnr2	-	ti	RNA	TGC	G>A	1	0	1
G140p1_M	G126	G140	G140p1	pup	male	21	muscle	CV	1286	G	A	2429	1	0.0004	somatic	mt-Rnr2	-	ti	RNA	TGA	G>A	1	0	1
G134_Oo1	G129	G134	G134	mother	female	295	single oocyte	CV	1296	G	T	897	1	0.0011	germline	mt-Rnr2	-	tv	RNA	AGA	G>T	0	1	1
G137p4_Br	G126	G137	G137p4	pup	male	18	brain	CV	1309	T	C	2173	1	0.0005	somatic	mt-Rnr2	-	ti	RNA	CTA	T>C	1	0	1
G139p1_Br	G126	G139	G139p1	pup	female	18	brain	CV	1314	G	A	1075	1	0.0009	somatic	mt-Rnr2	-	ti	RNA	AGA	G>A	1	0	1
G140_Br	G126	G140	G140	mother	female	316	brain	CV	1324	T	C	2751	1	0.0004	somatic	mt-Rnr2	-	ti	RNA	CTA	T>C	1	0	1
G133p1_Br	G129	G133	G133p1	pup	male	19	brain	CV	1326	G	T	574	1	0.0017	somatic	mt-Rnr2	-	tv	RNA	AGA	G>T	0	1	1
G132p6_M	G129	G132	G132p6	pup	female	21	muscle	CV	1383	G	A	1362	1	0.0007	somatic	mt-Rnr2	-	ti	RNA	TGT	G>A	0	1	1
G140_M	G126	G140	G140	mother	female	316	muscle	CV	1401	G	A	2777	1	0.0004	somatic	mt-Rnr2	-	ti	RNA	AGA	G>A	1	0	1
G133p4_Br	G129	G133	G133p4	pup	female	19	brain	CV	1402	A	G	2268	1	0.0004	somatic	mt-Rnr2	-	ti	RNA	GAT	A>G	0	1	1
G132p7_Br	G129	G132	G132p7	pup	female	21	brain	CV	1423	G	A	4302	3	0.0007	somatic	mt-Rnr2	-	ti	RNA	AGC	G>A	0	1	1
G139_Oo2	G126	G139	G139	mother	female	316	single oocyte	FS	1424	C	A	512	1	0.002	germline	mt-Rnr2	-	tv	RNA	GCC	C>A	1	0	1
G132p2_M	G129	G132	G132p2	pup	male	19	muscle	CV	1425	C	G	2522	1	0.0004	somatic	mt-Rnr2	-	tv	RNA	CCT	C>G	0	1	1
G132p5_Oo_pool	G129	G132	G132p5	pup	female	21	oocyte pool	CV	1432	G	A	1886	2	0.0011	germline	mt-Rnr2	-	ti	RNA	AGC	G>A	0	1	1
G131_Oo6	G129	G131	G131	mother	female	291	single oocyte	FS	1446	G	A	92	1	0.0109	germline	mt-Rnr2	-	ti	RNA	TGG	G>A	0	1	1
G132p7_Br	G129	G132	G132p7	pup	female	21	brain	CV	1477	T	C	4112	1	0.0002	somatic	mt-Rnr2	-	ti	RNA	TTT	T>C	0	1	1
G131p2_M	G129	G131	G131p2	pup	male	18	muscle	CV	1510	G	T	2285	1	0.0004	somatic	mt-Rnr2	-	tv	RNA	AGT	G>T	0	1	1
G132p7_Br	G129	G132	G132p7	pup	female	21	brain	CV	1521	T	C	4258	1	0.0002	somatic	mt-Rnr2	-	ti	RNA	ATT	T>C	0	1	1
G139_M	G126	G139	G139	mother	female	316	muscle	CV	1533	G	A	3418	1	0.0003	somatic	mt-Rnr2	-	ti	RNA	AGA	G>A	1	0	1
G140_Br	G126	G140	G140	mother	female	316	brain	CV	1537	G	A	2759	1	0.0004	somatic	mt-Rnr2	-	ti	RNA	GGA	G>A	1	0	1
G140p7_Oo3	G126	G140	G140p7	pup	female	21	single oocyte	FS	1573	G	A	383	1	0.0026	germline	mt-Rnr2	-	ti	RNA	TGA	G>A	1	0	1
G137_Oo2	G126	G137	G137	mother	female	320	single oocyte	FS	1581	A	G	762	1	0.0013	germline	mt-Rnr2	-	ti	RNA	TAA	A>G	1	0	1
G140p6_Br	G126	G140	G140p6	pup	female	21	brain	CV	1601	T	C	3710	2	0.0005	somatic	mt-Rnr2	-	ti	RNA	ATT	T>C	1	0	1
G133p4_M	G129	G133	G133p4	pup	female	19	muscle	CV	1603	G	T	2946	1	0.0003	somatic	mt-Rnr2	-	tv	RNA	TGT	G>T	0	1	1
G139_Oo3	G126	G139	G139	mother	female	316	single oocyte	FS	1686	C	A	1094	1	0.0009	germline	mt-Rnr2	-	tv	RNA	TCC	C>A	1	0	1
G133p3_Br	G129	G133	G133p3	pup	female	19	brain	CV	1703	G	A	4195	1	0.0002	somatic	mt-Rnr2	-	ti	RNA	GGT	G>A	1	1	2
G140p6_Br	G126	G140	G140p6	pup	female	21	brain	CV	1703	G	A	4093	1	0.0002	somatic	mt-Rnr2	-	ti	RNA	GGT	G>A	1	1	2
G140_M	G126	G140	G140	mother	female	316	muscle	CV	1718	T	C	3070	1	0.0003	somatic	mt-Rnr2	-	ti	RNA	TTA	T>C	1	0	1
G137_Br	G126	G137	G137	mother	female	320	brain	CV	1733	G	A	1525	1	0.0007	somatic	mt-Rnr2	-	ti	RNA	TGT	G>A	1	0	1
G140p6_Br	G126	G140	G140p6	pup	female	21	brain	CV	1741	G	A	4182	1	0.0002	somatic	mt-Rnr2	-	ti	RNA	TGA	G>A	1	1	2
G131_M	G129	G131	G131	mother	female	291	muscle	CV	1741	G	A	1467	1	0.0007	somatic	mt-Rnr2	-	ti	RNA	TGA	G>A	1	1	2
G140p6_Br	G126	G140	G140p6	pup	female	21	brain	CV	1750	G	T	4216	1	0.0002	somatic	mt-Rnr2	-	tv	RNA	AGA	G>T	1	0	1
G136_Br	G126	G136	G136	mother	female	299	brain	CV	1761	C	T	2489	1	0.0004	somatic	mt-Rnr2	-	ti	RNA	TCT	C>T	1	0	1
G139_Oo3	G126	G139	G139	mother	female	316	single oocyte	FS	1767	G	A	1084	1	0.0009	germline	mt-Rnr2	-	ti	RNA	GGC	G>A	1	0	1
G139_M	G126	G139	G139	mother	female	316	muscle	CV	1774	C	A	3930	1	0.0003	somatic	mt-Rnr2	-	tv	RNA	GCG	C>A	1	0	1
G134_M	G129	G134	G134	mother	female	295	muscle	CV	1779	A	G	852	1	0.0012	somatic	mt-Rnr2	-	ti	RNA	TAA	A>G	0	1	1
G136_Br	G126	G136	G136	mother	female	299	brain	CV	1788	G	A	2496	1	0.0004	somatic	mt-Rnr2	-	ti	RNA	GGA	G>A	2	0	2
G140_M	G126	G140	G140	mother	female	316	muscle	CV	1788	G	A	3156	1	0.0003	somatic	mt-Rnr2	-	ti	RNA	GGA	G>A	2	0	2
G131_M	G129	G131	G131	mother	female	291	muscle	CV	1798	G	A	1494	1	0.0007	somatic	mt-Rnr2	-	ti	RNA	TGT	G>A	0	1	1
G133_M	G129	G133	G133	mother	female	308	muscle	CV	1803	T	C	2644	1	0.0004	somatic	mt-Rnr2	-	ti	RNA	GTT	T>C	0	1	1
G132p6_Oo_pool	G129	G132	G132p6	pup	female	21	oocyte pool	CV	1841	C	T	1994	6	0.003	germline	mt-Rnr2	-	ti	RNA	TCC	C>T	0	1	1
G133_Oo_pool	G129	G133	G133	mother	female	308	oocyte pool	CV	1861	A	G	1754	1	0.0006	germline	mt-Rnr2	-	ti	RNA	TAA	A>G	0	1	1
G140p7_Oo2	G126	G140	G140p7	pup	female	21	single oocyte	FS	1865	C	A	416	1	0.0024	germline	mt-Rnr2	-	tv	RNA	CCA	C>A	1	0	1
G136_Br	G126	G136	G136	mother	female	299	brain	CV	1871	C	T	2626	1	0.0004	somatic	mt-Rnr2	-	ti	RNA	CCG	CpG>TpG	1	0	1
G133p3_Br	G129	G133	G133p3	pup	female	19	brain	CV	1872	G	A	4373	1	0.0002	somatic	mt-Rnr2	-	ti	RNA	CGG	CpG>CpA	0	2	2
G134p7_Br	G129	G134	G134p7	pup	female	18	brain	CV	1872	G	A	1127	1	0.0009	somatic	mt-Rnr2	-	ti	RNA	CGG	CpG>CpA	0	2	2
G132_M	G129	G132	G132	mother	female	312	muscle	CV	1872	G	T	2914	1	0.0003	somatic	mt-Rnr2	-	tv	RNA	CGG	G>T	1	1	2
G139_M	G126	G139	G139	mother	female	316	muscle	CV	1872	G	T	4197	1	0.0002	somatic	mt-Rnr2	-	tv	RNA	CGG	G>T	1	1	2
G137p5_Br	G126	G137	G137p5	pup	female	18	brain	CV	1873	G	A	2528	1	0.0004	somatic	mt-Rnr2	-	ti	RNA	GGA	G>A	1	0	1
G137p4_M	G126	G137	G137p4	pup	male	18	muscle	CV	1877	G	T	988	1	0.001	somatic	mt-Rnr2	-	tv	RNA	TGC	G>T	1	0	1
G139_Br	G126	G139	G139	mother	female	316	brain	CV	1910	C	T	3389	1	0.0003	somatic	mt-Rnr2	-	ti	RNA	ACT	C>T	1	0	1
G136_Oo6	G126	G136	G136	mother	female	299	single oocyte	FS	1913	G	T	851	1	0.0012	germline	mt-Rnr2	-	tv	RNA	CGG	G>T	1	0	1
G140p7_Oo_pool	G126	G140	G140p7	pup	female	21	oocyte pool	CV	1924	A	G	1403	1	0.0007	germline	mt-Rnr2	-	ti	RNA	AAC	A>G	1	0	1
G132p3_Br	G129	G132	G132p3	pup	female	19	brain	CV	1933	G	A	1148	1	0.0009	somatic	mt-Rnr2	-	ti	RNA	TGT	G>A	0	1	1
G132p8_Br	G129	G132	G132p8	pup	female	21	brain	CV	1934	T	C	3196	2	0.0006	somatic	mt-Rnr2	-	ti	RNA	GTT	T>C	0	1	1
G133p1_Br	G129	G133	G133p1	pup	male	19	brain	CV	1956	G	A	748	2	0.0027	somatic	mt-Rnr2	-	ti	RNA	AGC	G>A	0	1	1
G136_Oo_pool	G126	G136	G136	mother	female	299	oocyte pool	CV	1960	T	C	2858	2	0.0007	germline	mt-Rnr2	-	ti	RNA	TTA	T>C	1	0	1
G133p3_Br	G129	G133	G133p3	pup	female	19	brain	CV	1966	T	A	4737	1	0.0002	somatic	mt-Rnr2	-	tv	RNA	GTA	T>A	0	1	1
G136_M	G126	G136	G136	mother	female	299	muscle	CV	1971	G	A	965	1	0.001	somatic	mt-Rnr2	-	ti	RNA	AGA	G>A	1	0	1
G140_M	G126	G140	G140	mother	female	316	muscle	CV	1979	G	A	3399	1	0.0003	somatic	mt-Rnr2	-	ti	RNA	TGC	G>A	1	1	2
G134_Oo1	G129	G134	G134	mother	female	295	single oocyte	CV	1979	G	A	1063	1	0.0009	germline	mt-Rnr2	-	ti	RNA	TGC	G>A	1	1	2
G132_Oo1	G129	G132	G132	mother	female	312	single oocyte	FS	1997	G	A	458	1	0.0022	germline	mt-Rnr2	-	ti	RNA	AGT	G>A	0	1	1
G137p2_Br	G126	G137	G137p2	pup	female	17	brain	CV	1997	G	C	3496	1	0.0003	somatic	mt-Rnr2	-	tv	RNA	AGT	G>C	1	0	1
G133_Br	G129	G133	G133	mother	female	308	brain	CV	2005	G	A	2284	1	0.0004	somatic	mt-Rnr2	-	ti	RNA	GGC	G>A	0	1	1
G133_Oo2	G129	G133	G133	mother	female	308	single oocyte	FS	2008	G	A	374	1	0.0027	germline	mt-Rnr2	-	ti	RNA	CGC	CpG>CpA	0	1	1
G133_Br	G129	G133	G133	mother	female	308	brain	CV	2011	G	A	2285	1	0.0004	somatic	mt-Rnr2	-	ti	RNA	GGT	G>A	0	1	1
G137p2_Br	G126	G137	G137p2	pup	female	17	brain	CV	2018	G	A	3468	2	0.0006	somatic	mt-Rnr2	-	ti	RNA	TGA	G>A	1	0	1
G137p5_Oo2	G126	G137	G137p5	pup	female	18	single oocyte	FS	2025	C	A	223	1	0.0045	germline	mt-Rnr2	-	tv	RNA	GCA	C>A	1	0	1
G134_Br	G129	G134	G134	mother	female	295	brain	CV	2033	G	A	184	1	0.0054	somatic	mt-Rnr2	-	ti	RNA	AGC	G>A	0	1	1
G132_M	G129	G132	G132	mother	female	312	muscle	CV	2057	G	A	3067	1	0.0003	somatic	mt-Rnr2	-	ti	RNA	AGG	G>A	0	2	2
G133_Oo3	G129	G133	G133	mother	female	308	single oocyte	FS	2057	G	A	270	1	0.0037	germline	mt-Rnr2	-	ti	RNA	AGG	G>A	0	2	2
G132p5_Oo2	G129	G132	G132p5	pup	female	21	single oocyte	FS	2068	G	T	191	1	0.0052	germline	mt-Rnr2	-	tv	RNA	TGA	G>T	0	1	1
G131_Br	G129	G131	G131	mother	female	291	brain	CV	2080	G	A	2242	1	0.0005	somatic	mt-Rnr2	-	ti	RNA	CGA	CpG>CpA	0	2	2
G132p8_Br	G129	G132	G132p8	pup	female	21	brain	CV	2080	G	A	3131	1	0.0003	somatic	mt-Rnr2	-	ti	RNA	CGA	CpG>CpA	0	2	2
G139_Br	G126	G139	G139	mother	female	316	brain	CV	2084	G	A	3382	1	0.0003	somatic	mt-Rnr2	-	ti	RNA	GGT	G>A	1	0	1
G136_Oo3	G126	G136	G136	mother	female	299	single oocyte	FS	2091	T	C	753	1	0.0013	germline	mt-Rnr2	-	ti	RNA	CTG	T>C	1	0	1
G140p1_Br	G126	G140	G140p1	pup	male	21	brain	CV	2110	G	A	4843	2	0.0004	somatic	mt-Rnr2	-	ti	RNA	AGT	G>A	2	0	2
G139p2_M	G126	G139	G139p2	pup	female	18	muscle	CV	2110	G	A	1352	1	0.0007	somatic	mt-Rnr2	-	ti	RNA	AGT	G>A	2	0	2
G137p5_Br	G126	G137	G137p5	pup	female	18	brain	CV	2113	A	G	2545	1	0.0004	somatic	mt-Rnr2	-	ti	RNA	GAA	A>G	1	0	1
G137p5_M	G126	G137	G137p5	pup	female	18	muscle	CV	2117	T	C	3116	1	0.0003	somatic	mt-Rnr2	-	ti	RNA	TTG	T>C	1	0	1
G132p2_M	G129	G132	G132p2	pup	male	19	muscle	CV	2118	G	T	3124	1	0.0003	somatic	mt-Rnr2	-	tv	RNA	TGA	G>T	0	1	1
G137p2_M	G126	G137	G137p2	pup	female	17	muscle	CV	2125	C	G	2207	1	0.0005	somatic	mt-Rnr2	-	tv	RNA	TCA	C>G	1	0	1
G137p5_M	G126	G137	G137p5	pup	female	18	muscle	CV	2127	G	A	3094	1	0.0003	somatic	mt-Rnr2	-	ti	RNA	AGT	G>A	1	0	1
G140p1_Br	G126	G140	G140p1	pup	male	21	brain	CV	2129	G	A	4889	1	0.0002	somatic	mt-Rnr2	-	ti	RNA	TGA	G>A	1	0	1
G139p2_Br	G126	G139	G139p2	pup	female	18	brain	CV	2129	G	C	1349	1	0.0007	somatic	mt-Rnr2	-	tv	RNA	TGA	G>C	1	0	1
G132p6_Br	G129	G132	G132p6	pup	female	21	brain	CV	2132	G	T	1091	1	0.0009	somatic	mt-Rnr2	-	tv	RNA	AGA	G>T	0	1	1
G140p7_Br	G126	G140	G140p7	pup	female	21	brain	CV	2135	G	A	1453	1	0.0007	somatic	mt-Rnr2	-	ti	RNA	GGC	G>A	1	0	1
G131p1_Br	G129	G131	G131p1	pup	male	18	brain	CV	2154	A	G	922	1	0.0011	somatic	mt-Rnr2	-	ti	RNA	GAC	A>G	0	1	1
G132_Oo3	G129	G132	G132	mother	female	312	single oocyte	FS	2156	G	A	289	2	0.0069	germline	mt-Rnr2	-	ti	RNA	CGA	CpG>CpA	1	2	3
G132p9_M	G129	G132	G132p9	pup	female	21	muscle	CV	2156	G	T	1245	1	0.0008	somatic	mt-Rnr2	-	tv	RNA	CGA	G>T	0	1	1
G137_M	G126	G137	G137	mother	female	320	muscle	CV	2156	G	A	2371	1	0.0004	somatic	mt-Rnr2	-	ti	RNA	CGA	CpG>CpA	1	2	3
G133_Oo3	G129	G133	G133	mother	female	308	single oocyte	FS	2156	G	A	240	1	0.0042	germline	mt-Rnr2	-	ti	RNA	CGA	CpG>CpA	1	2	3
G140p7_M	G126	G140	G140p7	pup	female	21	muscle	CV	2172	G	C	1909	1	0.0005	somatic	mt-Rnr2	-	tv	RNA	AGC	G>C	1	0	1
G133p2_Br	G129	G133	G133p2	pup	male	19	brain	CV	2180	T	C	2541	1	0.0004	somatic	mt-Rnr2	-	ti	RNA	TTA	T>C	0	1	1
G134p7_M	G129	G134	G134p7	pup	female	18	muscle	CV	2192	C	A	2439	1	0.0004	somatic	mt-Rnr2	-	tv	RNA	TCT	C>A	0	1	1
G137p2_Oo2	G126	G137	G137p2	pup	female	17	single oocyte	FS	2209	C	T	75	1	0.0133	germline	mt-Rnr2	-	ti	RNA	ACC	C>T	1	0	1
G132p6_Oo2	G129	G132	G132p6	pup	female	21	single oocyte	FS	2216	G	A	408	1	0.0025	germline	mt-Rnr2	-	ti	RNA	GGC	G>A	0	1	1
G132p5_Br	G129	G132	G132p5	pup	female	21	brain	CV	2236	G	A	324	1	0.0031	somatic	mt-Rnr2	-	ti	RNA	AGT	G>A	0	1	1
G133_Br	G129	G133	G133	mother	female	308	brain	CV	2248	G	A	2177	1	0.0005	somatic	mt-Rnr2	-	ti	RNA	CGG	CpG>CpA	0	1	1
G140_M	G126	G140	G140	mother	female	316	muscle	CV	2254	G	A	3372	1	0.0003	somatic	mt-Rnr2	-	ti	RNA	GGG	G>A	1	0	1
G133_Br	G129	G133	G133	mother	female	308	brain	CV	2259	C	T	2177	1	0.0005	somatic	mt-Rnr2	-	ti	RNA	ACC	C>T	0	1	1
G139_Br	G126	G139	G139	mother	female	316	brain	CV	2263	G	A	3212	1	0.0003	somatic	mt-Rnr2	-	ti	RNA	CGG	CpG>CpA	1	2	3
G132p3_M	G129	G132	G132p3	pup	female	19	muscle	CV	2263	G	A	1808	1	0.0006	somatic	mt-Rnr2	-	ti	RNA	CGG	CpG>CpA	1	2	3
G133_M	G129	G133	G133	mother	female	308	muscle	CV	2263	G	A	2701	1	0.0004	somatic	mt-Rnr2	-	ti	RNA	CGG	CpG>CpA	1	2	3
G132p5_M	G129	G132	G132p5	pup	female	21	muscle	CV	2264	G	A	2008	2	0.001	somatic	mt-Rnr2	-	ti	RNA	GGA	G>A	0	2	2
G132p5_Oo_pool	G129	G132	G132p5	pup	female	21	oocyte pool	CV	2264	G	A	1968	1	0.0005	germline	mt-Rnr2	-	ti	RNA	GGA	G>A	0	2	2
G134_Oo1	G129	G134	G134	mother	female	295	single oocyte	CV	2266	G	A	872	1	0.0012	germline	mt-Rnr2	-	ti	RNA	AGA	G>A	0	1	1
G140p5_Br	G126	G140	G140p5	pup	female	21	brain	CV	2327	T	C	2014	1	0.0005	somatic	mt-Rnr2	-	ti	RNA	ATC	T>C	1	0	1
G132p8_M	G129	G132	G132p8	pup	female	21	muscle	CV	2340	G	A	1657	1	0.0006	somatic	mt-Rnr2	-	ti	RNA	AGA	G>A	0	1	1
G137_Br	G126	G137	G137	mother	female	320	brain	CV	2342	T	C	1514	1	0.0007	somatic	mt-Rnr2	-	ti	RNA	ATA	T>C	1	0	1
G132p4_Br	G129	G132	G132p4	pup	female	19	brain	CV	2360	C	G	1800	1	0.0006	somatic	mt-Rnr2	-	tv	RNA	ACC	C>G	0	1	1
G132_M	G129	G132	G132	mother	female	312	muscle	CV	2364	G	A	2548	1	0.0004	somatic	mt-Rnr2	-	ti	RNA	AGT	G>A	0	3	3
G132p8_M	G129	G132	G132p8	pup	female	21	muscle	CV	2364	G	A	1653	1	0.0006	somatic	mt-Rnr2	-	ti	RNA	AGT	G>A	0	3	3
G132p5_Oo_pool	G129	G132	G132p5	pup	female	21	oocyte pool	CV	2364	G	A	2163	1	0.0005	germline	mt-Rnr2	-	ti	RNA	AGT	G>A	0	3	3
G140_M	G126	G140	G140	mother	female	316	muscle	CV	2365	T	C	3411	1	0.0003	somatic	mt-Rnr2	-	ti	RNA	GTT	T>C	1	0	1
G132_M	G129	G132	G132	mother	female	312	muscle	CV	2369	C	G	2547	1	0.0004	somatic	mt-Rnr2	-	tv	RNA	CCC	C>G	0	1	1
G133_M	G129	G133	G133	mother	female	308	muscle	CV	2373	G	A	2757	1	0.0004	somatic	mt-Rnr2	-	ti	RNA	AGG	G>A	0	1	1
G140p6_Br	G126	G140	G140p6	pup	female	21	brain	CV	2374	G	A	4366	1	0.0002	somatic	mt-Rnr2	-	ti	RNA	GGG	G>A	1	0	1
G140p1_Br	G126	G140	G140p1	pup	male	21	brain	CV	2396	A	T	4477	1	0.0002	somatic	mt-Rnr2	-	tv	RNA	TAA	A>T	1	0	1
G132p9_Br	G129	G132	G132p9	pup	female	21	brain	CV	2398	G	A	1009	1	0.001	somatic	mt-Rnr2	-	ti	RNA	AGA	G>A	0	1	1
G132p9_Br	G129	G132	G132p9	pup	female	21	brain	CV	2407	T	C	1006	1	0.001	somatic	mt-Rnr2	-	ti	RNA	ATC	T>C	0	1	1
G132p2_M	G129	G132	G132p2	pup	male	19	muscle	CV	2408	C	A	2707	1	0.0004	somatic	mt-Rnr2	-	tv	RNA	TCG	C>A	1	1	2
G140_Oo3	G126	G140	G140	mother	female	316	single oocyte	FS	2408	C	A	781	1	0.0013	germline	mt-Rnr2	-	tv	RNA	TCG	C>A	1	1	2
G140p6_Br	G126	G140	G140p6	pup	female	21	brain	CV	2409	G	A	4360	1	0.0002	somatic	mt-Rnr2	-	ti	RNA	CGA	CpG>CpA	1	0	1
G140p5_M	G126	G140	G140p5	pup	female	21	muscle	CV	2430	C	A	2368	1	0.0004	somatic	mt-Rnr2	-	tv	RNA	TCG	C>A	1	0	1
G140p1_Br	G126	G140	G140p1	pup	male	21	brain	CV	2438	G	T	4343	1	0.0002	somatic	mt-Rnr2	-	tv	RNA	GGA	G>T	2	0	2
G139p2_M	G126	G139	G139p2	pup	female	18	muscle	CV	2438	G	T	1382	1	0.0007	somatic	mt-Rnr2	-	tv	RNA	GGA	G>T	2	0	2
G140_Br	G126	G140	G140	mother	female	316	brain	CV	2456	G	A	3009	1	0.0003	somatic	mt-Rnr2	-	ti	RNA	GGT	G>A	1	0	1
G132p8_M	G129	G132	G132p8	pup	female	21	muscle	CV	2461	G	A	1581	1	0.0006	somatic	mt-Rnr2	-	ti	RNA	AGA	G>A	0	1	1
G140p7_Oo3	G126	G140	G140p7	pup	female	21	single oocyte	FS	2474	G	A	395	1	0.0025	germline	mt-Rnr2	-	ti	RNA	GGT	G>A	1	0	1
G137_Oo2	G126	G137	G137	mother	female	320	single oocyte	FS	2482	G	A	854	1	0.0012	germline	mt-Rnr2	-	ti	RNA	TGT	G>A	1	0	1
G140p6_Br	G126	G140	G140p6	pup	female	21	brain	CV	2483	T	C	4183	1	0.0002	somatic	mt-Rnr2	-	ti	RNA	GTT	T>C	1	0	1
G139_M	G126	G139	G139	mother	female	316	muscle	CV	2489	G	A	3978	1	0.0003	somatic	mt-Rnr2	-	ti	RNA	CGA	CpG>CpA	1	0	1
G139_Br	G126	G139	G139	mother	female	316	brain	CV	2503	G	A	2898	1	0.0004	somatic	mt-Rnr2	-	ti	RNA	CGT	CpG>CpA	1	1	2
G133_Oo1	G129	G133	G133	mother	female	308	single oocyte	FS	2503	G	A	930	1	0.0011	germline	mt-Rnr2	-	ti	RNA	CGT	CpG>CpA	1	1	2
G136_M	G126	G136	G136	mother	female	299	muscle	CV	2505	G	A	894	1	0.0011	somatic	mt-Rnr2	-	ti	RNA	TGA	G>A	1	0	1
G139p2_Br	G126	G139	G139p2	pup	female	18	brain	CV	2517	G	A	1350	1	0.0007	somatic	mt-Rnr2	-	ti	RNA	AGA	G>A	1	0	1
G133_M	G129	G133	G133	mother	female	308	muscle	CV	2553	G	A	2580	1	0.0004	somatic	mt-Rnr2	-	ti	RNA	CGA	CpG>CpA	0	1	1
G132p4_M	G129	G132	G132p4	pup	female	19	muscle	CV	2554	A	G	1238	1	0.0008	somatic	mt-Rnr2	-	ti	RNA	GAT	A>G	0	1	1
G133p2_M	G129	G133	G133p2	pup	male	19	muscle	CV	2559	T	C	794	1	0.0013	somatic	mt-Rnr2	-	ti	RNA	CTC	T>C	0	1	1
G137p4_Br	G126	G137	G137p4	pup	male	18	brain	CV	2564	G	A	2467	1	0.0004	somatic	mt-Rnr2	-	ti	RNA	AGT	G>A	1	0	1
G140p6_Br	G126	G140	G140p6	pup	female	21	brain	CV	2572	G	A	4152	1	0.0002	somatic	mt-Rnr2	-	ti	RNA	AGG	G>A	1	0	1
G140_M	G126	G140	G140	mother	female	316	muscle	CV	2580	G	A	3049	1	0.0003	somatic	mt-Rnr2	-	ti	RNA	AGA	G>A	1	0	1
G140_M	G126	G140	G140	mother	female	316	muscle	CV	2586	G	T	3037	1	0.0003	somatic	mt-Rnr2	-	tv	RNA	AGA	G>T	1	0	1
G140_M	G126	G140	G140	mother	female	316	muscle	CV	2588	G	A	3024	2	0.0007	somatic	mt-Rnr2	-	ti	RNA	AGC	G>A	1	0	1
G139_Br	G126	G139	G139	mother	female	316	brain	CV	2605	C	T	2903	1	0.0003	somatic	mt-Rnr2	-	ti	RNA	GCG	CpG>TpG	1	0	1
G132p7_Br	G129	G132	G132p7	pup	female	21	brain	CV	2611	C	A	4858	1	0.0002	somatic	mt-Rnr2	-	tv	RNA	TCA	C>A	0	1	1
G137_M	G126	G137	G137	mother	female	320	muscle	CV	2615	T	C	2479	1	0.0004	somatic	mt-Rnr2	-	ti	RNA	CTT	T>C	1	0	1
G133_Br	G129	G133	G133	mother	female	308	brain	CV	2624	G	A	1882	1	0.0005	somatic	mt-Rnr2	-	ti	RNA	TGA	G>A	0	1	1
G133p3_Oo_pool	G129	G133	G133p3	pup	female	19	oocyte pool	CV	2626	A	G	826	3	0.0036	germline	mt-Rnr2	-	ti	RNA	AAT	A>G	0	1	1
G137p2_Oo_pool	G126	G137	G137p2	pup	female	17	oocyte pool	CV	2653	C	A	661	1	0.0015	germline	mt-Rnr2	-	tv	RNA	ACA	C>A	1	0	1
G131p3_M	G129	G131	G131p3	pup	female	18	muscle	CV	2656	C	G	2551	1	0.0004	somatic	mt-Rnr2	-	tv	RNA	CCC	C>G	0	1	1
G140_Br	G126	G140	G140	mother	female	316	brain	CV	2664	C	G	2932	1	0.0003	somatic	mt-Rnr2	-	tv	RNA	CCT	C>G	1	0	1
G132p5_M	G129	G132	G132p5	pup	female	21	muscle	CV	2682	G	A	1951	1	0.0005	somatic	TrnL1	-	ti	RNA	GGT	G>A	0	1	1
G139_M	G126	G139	G139	mother	female	316	muscle	CV	2685	G	A	4293	1	0.0002	somatic	TrnL1	-	ti	RNA	GGC	G>A	1	0	1
G140_Br	G126	G140	G140	mother	female	316	brain	CV	2690	G	A	2932	1	0.0003	somatic	TrnL1	-	ti	RNA	AGC	G>A	1	2	3
G133_Oo3	G129	G133	G133	mother	female	308	single oocyte	FS	2690	G	A	215	1	0.0047	germline	TrnL1	-	ti	RNA	AGC	G>A	1	2	3
G133_Oo5	G129	G133	G133	mother	female	308	single oocyte	FS	2690	G	A	432	1	0.0023	germline	TrnL1	-	ti	RNA	AGC	G>A	1	2	3
G133p1_M	G129	G133	G133p1	pup	male	19	muscle	CV	2694	G	T	985	1	0.001	somatic	TrnL1	-	tv	RNA	AGG	G>T	0	1	1
G131_M	G129	G131	G131	mother	female	291	muscle	CV	2695	G	A	1442	1	0.0007	somatic	TrnL1	-	ti	RNA	GGA	G>A	0	1	1
G132p9_M	G129	G132	G132p9	pup	female	21	muscle	CV	2701	G	A	1200	2	0.0017	somatic	TrnL1	-	ti	RNA	TGC	G>A	0	1	1
G137_Br	G126	G137	G137	mother	female	320	brain	CV	2703	G	A	1464	1	0.0007	somatic	TrnL1	-	ti	RNA	CGT	CpG>CpA	1	0	1
G136_Oo_pool	G126	G136	G136	mother	female	299	oocyte pool	CV	2723	C	A	2533	1	0.0004	germline	TrnL1	-	tv	RNA	TCC	C>A	1	0	1
G139_Br	G126	G139	G139	mother	female	316	brain	CV	2727	G	A	3243	1	0.0003	somatic	TrnL1	-	ti	RNA	AGA	G>A	1	0	1
G132p8_M	G129	G132	G132p8	pup	female	21	muscle	CV	2758	T	C	1670	1	0.0006	somatic	ND1	nonsyn	ti	protein coding	TTT	T>C	0	1	1
G140p1_Br	G126	G140	G140p1	pup	male	21	brain	CV	2764	A	T	4394	1	0.0002	somatic	ND1	nonsyn	tv	protein coding	AAT	A>T	1	0	1
G137p5_M	G126	G137	G137p5	pup	female	18	muscle	CV	2768	C	T	3023	1	0.0003	somatic	ND1	syn	ti	protein coding	TCC	C>T	1	0	1
G137p5_Br	G126	G137	G137p5	pup	female	18	brain	CV	2788	T	C	3057	2	0.0007	somatic	ND1	nonsyn	ti	protein coding	ATT	T>C	1	0	1
G132p1_Br	G129	G132	G132p1	pup	male	19	brain	CV	2800	T	C	1410	1	0.0007	somatic	ND1	nonsyn	ti	protein coding	ATA	T>C	0	1	1
G133p3_M	G129	G133	G133p3	pup	female	19	muscle	CV	2811	A	G	4471	4	0.0009	somatic	ND1	nonsyn	ti	protein coding	AAC	A>G	0	1	1
G139_Br	G126	G139	G139	mother	female	316	brain	CV	2817	G	A	3506	2	0.0006	somatic	ND1	nonsyn	ti	protein coding	AGT	G>A	1	1	2
G132p6_Oo_pool	G129	G132	G132p6	pup	female	21	oocyte pool	CV	2817	G	T	1943	1	0.0005	germline	ND1	nonsyn	tv	protein coding	AGT	G>T	0	1	1
G134p7_M	G129	G134	G134p7	pup	female	18	muscle	CV	2817	G	A	2678	1	0.0004	somatic	ND1	nonsyn	ti	protein coding	AGT	G>A	1	1	2
G132p6_Br	G129	G132	G132p6	pup	female	21	brain	CV	2825	C	T	853	1	0.0012	somatic	ND1	syn	ti	protein coding	GCA	C>T	0	1	1
G132p7_Br	G129	G132	G132p7	pup	female	21	brain	CV	2836	G	A	5357	1	0.0002	somatic	ND1	nonsyn	ti	protein coding	GGG	G>A	1	2	3
G137p5_M	G126	G137	G137p5	pup	female	18	muscle	CV	2836	G	A	3097	1	0.0003	somatic	ND1	nonsyn	ti	protein coding	GGG	G>A	1	2	3
G133_Oo1	G129	G133	G133	mother	female	308	single oocyte	FS	2836	G	A	923	1	0.0011	germline	ND1	nonsyn	ti	protein coding	GGG	G>A	1	2	3
G140_Br	G126	G140	G140	mother	female	316	brain	CV	2837	G	A	2996	1	0.0003	somatic	ND1	syn	ti	protein coding	GGT	G>A	1	1	2
G131p3_M	G129	G131	G131p3	pup	female	18	muscle	CV	2837	G	A	2414	1	0.0004	somatic	ND1	syn	ti	protein coding	GGT	G>A	1	1	2
G140p5_M	G126	G140	G140p5	pup	female	21	muscle	CV	2839	A	T	2720	1	0.0004	somatic	ND1	nonsyn	tv	protein coding	TAC	A>T	1	0	1
G137_Oo2	G126	G137	G137	mother	female	320	single oocyte	FS	2856	G	A	804	1	0.0012	germline	ND1	nonsyn	ti	protein coding	AGG	G>A	1	0	1
G132p6_Br	G129	G132	G132p6	pup	female	21	brain	CV	2857	G	A	868	1	0.0012	somatic	ND1	nonsyn	ti	protein coding	GGC	G>A	0	1	1
G140_Br	G126	G140	G140	mother	female	316	brain	CV	2872	G	A	3016	1	0.0003	somatic	ND1	nonsyn	ti	protein coding	GGT	G>A	2	0	2
G140p7_Br	G126	G140	G140p7	pup	female	21	brain	CV	2872	G	A	1455	1	0.0007	somatic	ND1	nonsyn	ti	protein coding	GGT	G>A	2	0	2
G133p4_Br	G129	G133	G133p4	pup	female	19	brain	CV	2889	C	T	2810	1	0.0004	somatic	ND1	nonsyn	ti	protein coding	ACA	C>T	0	1	1
G132p5_M	G129	G132	G132p5	pup	female	21	muscle	CV	2895	T	C	2091	1	0.0005	somatic	ND1	nonsyn	ti	protein coding	ATT	T>C	0	1	1
G136_Br	G126	G136	G136	mother	female	299	brain	CV	2896	T	C	2427	1	0.0004	somatic	ND1	nonsyn	ti	protein coding	TTT	T>C	1	0	1
G133p4_Oo_pool	G129	G133	G133p4	pup	female	19	oocyte pool	CV	2904	G	T	1985	1	0.0005	germline	ND1	nonsyn	tv	protein coding	CGC	G>T	0	1	1
G137_Br	G126	G137	G137	mother	female	320	brain	CV	2904	G	A	1471	1	0.0007	somatic	ND1	nonsyn	ti	protein coding	CGC	CpG>CpA	2	1	3
G132p8_M	G129	G132	G132p8	pup	female	21	muscle	CV	2904	G	A	1769	1	0.0006	somatic	ND1	nonsyn	ti	protein coding	CGC	CpG>CpA	2	1	3
G139p2_M	G126	G139	G139p2	pup	female	18	muscle	CV	2904	G	A	1353	1	0.0007	somatic	ND1	nonsyn	ti	protein coding	CGC	CpG>CpA	2	1	3
G131p3_Br	G129	G131	G131p3	pup	female	18	brain	CV	2956	C	A	3099	1	0.0003	somatic	ND1	nonsyn	tv	protein coding	TCC	C>A	0	1	1
G140p1_Br	G126	G140	G140p1	pup	male	21	brain	CV	2958	T	C	4680	1	0.0002	somatic	ND1	syn	ti	protein coding	CTT	T>C	1	0	1
G139_M	G126	G139	G139	mother	female	316	muscle	CV	2970	G	A	4932	2	0.0004	somatic	ND1	nonsyn	ti	protein coding	TGC	G>A	2	0	2
G139_Oo_pool	G126	G139	G139	mother	female	316	oocyte pool	CV	2970	G	A	488	3	0.0062	germline	ND1	nonsyn	ti	protein coding	TGC	G>A	2	0	2
G133p3_M	G129	G133	G133p3	pup	female	19	muscle	CV	2989	C	A	4679	1	0.0002	somatic	ND1	nonsyn	tv	protein coding	ACA	C>A	0	1	1
G139p2_Br	G126	G139	G139p2	pup	female	18	brain	CV	2994	G	C	1277	1	0.0008	somatic	ND1	nonsyn	tv	protein coding	AGC	G>C	1	0	1
G133p2_M	G129	G133	G133p2	pup	male	19	muscle	CV	3001	G	A	960	1	0.001	somatic	ND1	nonsyn	ti	protein coding	AGT	G>A	2	1	3
G140p6_M	G126	G140	G140p6	pup	female	21	muscle	CV	3001	G	A	2188	1	0.0005	somatic	ND1	nonsyn	ti	protein coding	AGT	G>A	2	1	3
G137p3_Oo_pool	G126	G137	G137p3	pup	female	17	oocyte pool	CV	3001	G	A	1178	1	0.0009	germline	ND1	nonsyn	ti	protein coding	AGT	G>A	2	1	3
G136_Br	G126	G136	G136	mother	female	299	brain	CV	3001	G	C	2431	1	0.0004	somatic	ND1	nonsyn	tv	protein coding	AGT	G>C	3	0	3
G140p6_Br	G126	G140	G140p6	pup	female	21	brain	CV	3001	G	C	5098	1	0.0002	somatic	ND1	nonsyn	tv	protein coding	AGT	G>C	3	0	3
G137_M	G126	G137	G137	mother	female	320	muscle	CV	3001	G	C	3218	1	0.0003	somatic	ND1	nonsyn	tv	protein coding	AGT	G>C	3	0	3
G137p5_Br	G126	G137	G137p5	pup	female	18	brain	CV	3022	T	C	3161	1	0.0003	somatic	ND1	nonsyn	ti	protein coding	ATA	T>C	1	0	1
G137p5_M	G126	G137	G137p5	pup	female	18	muscle	CV	3043	T	C	3182	1	0.0003	somatic	ND1	nonsyn	ti	protein coding	TTA	T>C	1	0	1
G134_M	G129	G134	G134	mother	female	295	muscle	CV	3051	G	A	796	1	0.0013	somatic	ND1	nonsyn	ti	protein coding	AGG	G>A	0	1	1
G134_Oo1	G129	G134	G134	mother	female	295	single oocyte	CV	3051	G	T	813	1	0.0012	germline	ND1	nonsyn	tv	protein coding	AGG	G>T	0	1	1
G136_Br	G126	G136	G136	mother	female	299	brain	CV	3052	G	A	2373	1	0.0004	somatic	ND1	nonsyn	ti	protein coding	GGG	G>A	1	0	1
G133_Br	G129	G133	G133	mother	female	308	brain	CV	3053	G	A	1896	1	0.0005	somatic	ND1	syn	ti	protein coding	GGA	G>A	1	1	2
G139_Br	G126	G139	G139	mother	female	316	brain	CV	3053	G	A	3760	1	0.0003	somatic	ND1	syn	ti	protein coding	GGA	G>A	1	1	2
G133_Br	G129	G133	G133	mother	female	308	brain	CV	3069	G	A	1863	1	0.0005	somatic	ND1	nonsyn	ti	protein coding	AGC	G>A	0	1	1
G131p2_Br	G129	G131	G131p2	pup	male	18	brain	CV	3079	G	A	1784	1	0.0006	somatic	ND1	nonsyn	ti	protein coding	AGC	G>A	0	1	1
G132p8_M	G129	G132	G132p8	pup	female	21	muscle	CV	3080	C	A	1840	1	0.0005	somatic	ND1	nonsyn	tv	protein coding	GCC	C>A	0	1	1
G132p7_Br	G129	G132	G132p7	pup	female	21	brain	CV	3108	G	A	5379	1	0.0002	somatic	ND1	nonsyn	ti	protein coding	AGG	G>A	0	1	1
G132p2_M	G129	G132	G132p2	pup	male	19	muscle	CV	3112	G	T	3213	1	0.0003	somatic	ND1	nonsyn	tv	protein coding	TGA	G>T	0	1	1
G140p6_Oo2	G126	G140	G140p6	pup	female	21	single oocyte	FS	3116	C	A	269	1	0.0037	germline	ND1	syn	tv	protein coding	CCT	C>A	1	0	1
G132p2_Br	G129	G132	G132p2	pup	male	19	brain	CV	3136	T	C	2466	1	0.0004	somatic	ND1	nonsyn	ti	protein coding	CTA	T>C	0	1	1
G133_M	G129	G133	G133	mother	female	308	muscle	CV	3141	G	A	3250	1	0.0003	somatic	ND1	nonsyn	ti	protein coding	CGG	CpG>CpA	0	2	2
G134_Oo_pool	G129	G134	G134	mother	female	295	oocyte pool	CV	3141	G	A	264	1	0.0038	germline	ND1	nonsyn	ti	protein coding	CGG	CpG>CpA	0	2	2
G139_Br	G126	G139	G139	mother	female	316	brain	CV	3151	G	A	3710	1	0.0003	somatic	ND1	nonsyn	ti	protein coding	CGA	CpG>CpA	1	0	1
G133p4_M	G129	G133	G133p4	pup	female	19	muscle	CV	3161	C	A	4169	1	0.0002	somatic	ND1	syn	tv	protein coding	CCC	C>A	0	1	1
G140_Oo3	G126	G140	G140	mother	female	316	single oocyte	FS	3162	C	A	734	1	0.0014	germline	ND1	nonsyn	tv	protein coding	CCA	C>A	1	0	1
G132p7_Br	G129	G132	G132p7	pup	female	21	brain	CV	3180	G	C	5388	1	0.0002	somatic	ND1	nonsyn	tv	protein coding	AGT	G>C	0	1	1
G133_Oo_pool	G129	G133	G133	mother	female	308	oocyte pool	CV	3197	C	G	1627	1	0.0006	germline	ND1	nonsyn	tv	protein coding	TCC	C>G	0	1	1
G139_Oo4	G126	G139	G139	mother	female	316	single oocyte	FS	3198	C	A	1433	1	0.0007	germline	ND1	nonsyn	tv	protein coding	CCT	C>A	1	0	1
G140_M	G126	G140	G140	mother	female	316	muscle	CV	3208	T	C	3553	1	0.0003	somatic	ND1	nonsyn	ti	protein coding	GTT	T>C	1	0	1
G131_Oo5	G129	G131	G131	mother	female	291	single oocyte	FS	3217	T	C	179	2	0.0112	germline	ND1	nonsyn	ti	protein coding	ATA	T>C	0	1	1
G137p4_Br	G126	G137	G137p4	pup	male	18	brain	CV	3222	G	A	2960	1	0.0003	somatic	ND1	nonsyn	ti	protein coding	TGG	G>A	1	0	1
G140p7_Oo3	G126	G140	G140p7	pup	female	21	single oocyte	FS	3222	G	T	390	1	0.0026	germline	ND1	nonsyn	tv	protein coding	TGG	G>T	1	0	1
G140_Br	G126	G140	G140	mother	female	316	brain	CV	3223	G	T	2973	1	0.0003	somatic	ND1	nonsyn	tv	protein coding	GGA	G>T	1	0	1
G133_Oo_pool	G129	G133	G133	mother	female	308	oocyte pool	CV	3226	C	A	1649	1	0.0006	germline	ND1	nonsyn	tv	protein coding	TCC	C>A	0	1	1
G133p4_M	G129	G133	G133p4	pup	female	19	muscle	CV	3237	C	T	4149	2	0.0005	somatic	ND1	nonsyn	ti	protein coding	ACA	C>T	0	1	1
G132p5_M	G129	G132	G132p5	pup	female	21	muscle	CV	3247	T	C	2225	1	0.0005	somatic	ND1	nonsyn	ti	protein coding	ATT	T>C	0	1	1
G140p7_Oo_pool	G126	G140	G140p7	pup	female	21	oocyte pool	CV	3250	C	T	1231	2	0.0016	germline	ND1	nonsyn	ti	protein coding	ACA	C>T	1	0	1
G137p3_Br	G126	G137	G137p3	pup	female	17	brain	CV	3252	A	G	1052	1	0.001	somatic	ND1	nonsyn	ti	protein coding	AAC	A>G	1	0	1
G132_M	G129	G132	G132	mother	female	312	muscle	CV	3253	C	G	3032	1	0.0003	somatic	ND1	nonsyn	tv	protein coding	ACC	C>G	0	1	1
G132p6_M	G129	G132	G132p6	pup	female	21	muscle	CV	3253	C	T	1602	1	0.0006	somatic	ND1	nonsyn	ti	protein coding	ACC	C>T	0	1	1
G133p1_M	G129	G133	G133p1	pup	male	19	muscle	CV	3258	G	A	998	1	0.001	somatic	ND1	nonsyn	ti	protein coding	AGA	G>A	0	1	1
G139p1_Oo_pool	G126	G139	G139p1	pup	female	18	oocyte pool	CV	3258	G	T	595	1	0.0017	germline	ND1	nonsyn	tv	protein coding	AGA	G>T	1	0	1
G132p7_Oo_pool	G129	G132	G132p7	pup	female	21	oocyte pool	CV	3263	C	A	1371	1	0.0007	germline	ND1	nonsyn	tv	protein coding	ACA	C>A	0	1	1
G131p2_Br	G129	G131	G131p2	pup	male	18	brain	CV	3263	C	T	1839	1	0.0005	somatic	ND1	syn	ti	protein coding	ACA	C>T	0	1	1
G134_Oo_pool	G129	G134	G134	mother	female	295	oocyte pool	CV	3271	T	C	271	1	0.0037	germline	ND1	nonsyn	ti	protein coding	TTA	T>C	0	1	1
G137_Br	G126	G137	G137	mother	female	320	brain	CV	3276	C	A	1581	3	0.0019	somatic	ND1	nonsyn	tv	protein coding	TCT	C>A	1	0	1
G133p3_M	G129	G133	G133p3	pup	female	19	muscle	CV	3282	G	A	4170	1	0.0002	somatic	ND1	nonsyn	ti	protein coding	AGC	G>A	0	1	1
G140_M	G126	G140	G140	mother	female	316	muscle	CV	3294	G	A	3575	1	0.0003	somatic	ND1	nonsyn	ti	protein coding	AGC	G>A	1	0	1
G132p8_Br	G129	G132	G132p8	pup	female	21	brain	CV	3304	G	A	3300	1	0.0003	somatic	ND1	nonsyn	ti	protein coding	TGA	G>A	1	1	2
G137p2_Br	G126	G137	G137p2	pup	female	17	brain	CV	3304	G	A	3563	1	0.0003	somatic	ND1	nonsyn	ti	protein coding	TGA	G>A	1	1	2
G131p3_M	G129	G131	G131p3	pup	female	18	muscle	CV	3321	G	A	2577	1	0.0004	somatic	ND1	nonsyn	ti	protein coding	AGC	G>A	1	1	2
G137_M	G126	G137	G137	mother	female	320	muscle	CV	3321	G	A	2911	1	0.0003	somatic	ND1	nonsyn	ti	protein coding	AGC	G>A	1	1	2
G131p2_M	G129	G131	G131p2	pup	male	18	muscle	CV	3335	G	A	2402	2	0.0008	somatic	ND1	syn	ti	protein coding	GGG	G>A	0	1	1
G137_M	G126	G137	G137	mother	female	320	muscle	CV	3336	G	A	2947	1	0.0003	somatic	ND1	nonsyn	ti	protein coding	GGC	G>A	1	0	1
G133_Br	G129	G133	G133	mother	female	308	brain	CV	3338	C	T	1923	1	0.0005	somatic	ND1	syn	ti	protein coding	CCC	C>T	0	1	1
G137p2_M	G126	G137	G137p2	pup	female	17	muscle	CV	3350	G	A	2236	1	0.0005	somatic	ND1	syn	ti	protein coding	TGA	G>A	1	0	1
G132p7_Br	G129	G132	G132p7	pup	female	21	brain	CV	3357	G	A	5398	1	0.0002	somatic	ND1	nonsyn	ti	protein coding	AGG	G>A	2	1	3
G140p7_Br	G126	G140	G140p7	pup	female	21	brain	CV	3357	G	A	1386	1	0.0007	somatic	ND1	nonsyn	ti	protein coding	AGG	G>A	2	1	3
G137_Oo2	G126	G137	G137	mother	female	320	single oocyte	FS	3357	G	A	870	1	0.0012	germline	ND1	nonsyn	ti	protein coding	AGG	G>A	2	1	3
G132p5_Oo_pool	G129	G132	G132p5	pup	female	21	oocyte pool	CV	3372	G	A	2058	2	0.001	germline	ND1	nonsyn	ti	protein coding	AGT	G>A	0	1	1
G133p4_Oo_pool	G129	G133	G133p4	pup	female	19	oocyte pool	CV	3379	G	A	1966	3	0.0015	germline	ND1	nonsyn	ti	protein coding	GGG	G>A	0	1	1
G136_Br	G126	G136	G136	mother	female	299	brain	CV	3387	G	A	2408	1	0.0004	somatic	ND1	nonsyn	ti	protein coding	CGT	CpG>CpA	2	0	2
G139p2_Br	G126	G139	G139p2	pup	female	18	brain	CV	3387	G	A	1255	1	0.0008	somatic	ND1	nonsyn	ti	protein coding	CGT	CpG>CpA	2	0	2
G136_M	G126	G136	G136	mother	female	299	muscle	CV	3390	G	A	886	1	0.0011	somatic	ND1	nonsyn	ti	protein coding	AGA	G>A	2	0	2
G140_M	G126	G140	G140	mother	female	316	muscle	CV	3390	G	A	3568	1	0.0003	somatic	ND1	nonsyn	ti	protein coding	AGA	G>A	2	0	2
G131p2_Br	G129	G131	G131p2	pup	male	18	brain	CV	3395	C	G	1795	1	0.0006	somatic	ND1	nonsyn	tv	protein coding	ACG	C>G	0	1	1
G140p1_Br	G126	G140	G140p1	pup	male	21	brain	CV	3400	C	A	4735	1	0.0002	somatic	ND1	nonsyn	tv	protein coding	GCC	C>A	1	0	1
G131p3_M	G129	G131	G131p3	pup	female	18	muscle	CV	3401	C	A	2611	1	0.0004	somatic	ND1	syn	tv	protein coding	CCG	C>A	0	1	1
G132_M	G129	G132	G132	mother	female	312	muscle	CV	3403	G	A	2924	1	0.0003	somatic	ND1	nonsyn	ti	protein coding	GGC	G>A	0	1	1
G132p6_Oo1	G129	G132	G132p6	pup	female	21	single oocyte	FS	3404	C	T	187	1	0.0054	germline	ND1	syn	ti	protein coding	GCC	C>T	0	1	1
G131p3_M	G129	G131	G131p3	pup	female	18	muscle	CV	3412	C	A	2597	1	0.0004	somatic	ND1	nonsyn	tv	protein coding	GCG	C>A	0	1	1
G139_Oo_pool	G126	G139	G139	mother	female	316	oocyte pool	CV	3422	T	A	503	1	0.002	germline	ND1	nonsyn	tv	protein coding	TTA	T>A	1	0	1
G140p6_Br	G126	G140	G140p6	pup	female	21	brain	CV	3433	A	T	4548	1	0.0002	somatic	ND1	nonsyn	tv	protein coding	TAC	A>T	1	0	1
G132p3_M	G129	G132	G132p3	pup	female	19	muscle	CV	3446	T	C	1981	1	0.0005	somatic	ND1	syn	ti	protein coding	TTC	T>C	0	1	1
G131_Br	G129	G131	G131	mother	female	291	brain	CV	3481	G	A	1932	1	0.0005	somatic	ND1	nonsyn	ti	protein coding	GGA	G>A	0	3	3
G133_M	G129	G133	G133	mother	female	308	muscle	CV	3481	G	A	3048	1	0.0003	somatic	ND1	nonsyn	ti	protein coding	GGA	G>A	0	3	3
G132p5_Oo3	G129	G132	G132p5	pup	female	21	single oocyte	FS	3481	G	A	195	1	0.0051	germline	ND1	nonsyn	ti	protein coding	GGA	G>A	0	3	3
G133_Br	G129	G133	G133	mother	female	308	brain	CV	3482	A	G	1803	1	0.0006	somatic	ND1	syn	ti	protein coding	GAC	A>G	0	1	1
G140p7_M	G126	G140	G140p7	pup	female	21	muscle	CV	3493	A	G	2272	1	0.0004	somatic	ND1	nonsyn	ti	protein coding	TAT	A>G	1	0	1
G137p2_Br	G126	G137	G137p2	pup	female	17	brain	CV	3500	T	C	3449	1	0.0003	somatic	ND1	syn	ti	protein coding	ATT	T>C	1	0	1
G131p3_M	G129	G131	G131p3	pup	female	18	muscle	CV	3502	T	C	2465	2	0.0008	somatic	ND1	nonsyn	ti	protein coding	TTA	T>C	0	1	1
G131_Br	G129	G131	G131	mother	female	291	brain	CV	3512	C	A	2026	1	0.0005	somatic	ND1	syn	tv	protein coding	TCT	C>A	0	1	1
G133_M	G129	G133	G133	mother	female	308	muscle	CV	3515	C	A	3168	1	0.0003	somatic	ND1	nonsyn	tv	protein coding	ACT	C>A	0	1	1
G132p8_Br	G129	G132	G132p8	pup	female	21	brain	CV	3543	C	A	3197	1	0.0003	somatic	ND1	nonsyn	tv	protein coding	ACT	C>A	0	1	1
G136_Br	G126	G136	G136	mother	female	299	brain	CV	3550	C	G	2495	1	0.0004	somatic	ND1	nonsyn	tv	protein coding	TCA	C>G	1	0	1
G140p7_Br	G126	G140	G140p7	pup	female	21	brain	CV	3571	G	A	1427	1	0.0007	somatic	ND1	nonsyn	ti	protein coding	CGA	CpG>CpA	1	0	1
G139_Br	G126	G139	G139	mother	female	316	brain	CV	3573	G	A	3891	1	0.0003	somatic	ND1	nonsyn	ti	protein coding	AGC	G>A	2	1	3
G131_M	G129	G131	G131	mother	female	291	muscle	CV	3573	G	A	1561	1	0.0006	somatic	ND1	nonsyn	ti	protein coding	AGC	G>A	2	1	3
G139p1_M	G126	G139	G139p1	pup	female	18	muscle	CV	3573	G	A	1926	1	0.0005	somatic	ND1	nonsyn	ti	protein coding	AGC	G>A	2	1	3
G137_Oo2	G126	G137	G137	mother	female	320	single oocyte	FS	3585	C	T	856	1	0.0012	germline	ND1	nonsyn	ti	protein coding	ACG	CpG>TpG	1	0	1
G139_M	G126	G139	G139	mother	female	316	muscle	CV	3592	G	A	4839	1	0.0002	somatic	ND1	nonsyn	ti	protein coding	CGT	CpG>CpA	1	0	1
G132p1_M	G129	G132	G132p1	pup	male	19	muscle	CV	3596	C	A	1642	1	0.0006	somatic	ND1	nonsyn	tv	protein coding	ACG	C>A	0	1	1
G133_Oo4	G129	G133	G133	mother	female	308	single oocyte	FS	3597	G	A	201	1	0.005	germline	ND1	nonsyn	ti	protein coding	CGA	CpG>CpA	0	1	1
G132p5_Oo_pool	G129	G132	G132p5	pup	female	21	oocyte pool	CV	3635	C	A	2105	1	0.0005	germline	ND1	syn	tv	protein coding	CCC	C>A	0	1	1
G132p6_M	G129	G132	G132p6	pup	female	21	muscle	CV	3638	A	G	1507	1	0.0007	somatic	ND1	syn	ti	protein coding	TAA	A>G	0	1	1
G133_M	G129	G133	G133	mother	female	308	muscle	CV	3652	G	A	3230	1	0.0003	somatic	ND1	nonsyn	ti	protein coding	TGT	G>A	0	1	1
G132p7_Oo_pool	G129	G132	G132p7	pup	female	21	oocyte pool	CV	3656	G	A	1356	1	0.0007	germline	ND1	syn	ti	protein coding	TGT	G>A	0	1	1
G137p2_Br	G126	G137	G137p2	pup	female	17	brain	CV	3667	C	A	3553	1	0.0003	somatic	ND1	nonsyn	tv	protein coding	TCT	C>A	1	0	1
G132p1_M	G129	G132	G132p1	pup	male	19	muscle	CV	3667	C	G	1578	1	0.0006	somatic	ND1	nonsyn	tv	protein coding	TCT	C>G	0	1	1
G139_Br	G126	G139	G139	mother	female	316	brain	CV	3684	G	A	3709	1	0.0003	somatic	ND1	nonsyn	ti	protein coding	AGC	G>A	1	0	1
G133_M	G129	G133	G133	mother	female	308	muscle	CV	3686	G	A	3028	1	0.0003	somatic	ND1	syn	ti	protein coding	CGG	CpG>CpA	0	2	2
G134_M	G129	G134	G134	mother	female	295	muscle	CV	3686	G	A	778	1	0.0013	somatic	ND1	syn	ti	protein coding	CGG	CpG>CpA	0	2	2
G137p1_M	G126	G137	G137p1	pup	male	17	muscle	CV	3688	G	A	1053	1	0.001	somatic	ND1	nonsyn	ti	protein coding	GGA	G>A	1	0	1
G132_M	G129	G132	G132	mother	female	312	muscle	CV	3690	G	A	2778	1	0.0004	somatic	ND1	nonsyn	ti	protein coding	AGT	G>A	0	1	1
G132p3_Br	G129	G132	G132p3	pup	female	19	brain	CV	3701	C	T	1189	1	0.0008	somatic	ND1	syn	ti	protein coding	ACA	C>T	0	1	1
G132_Oo2	G129	G132	G132	mother	female	312	single oocyte	FS	3707	G	A	44	1	0.0227	germline	TrnI	-	ti	RNA	AGA	G>A	0	1	1
G139_M	G126	G139	G139	mother	female	316	muscle	CV	3714	G	A	4439	1	0.0002	somatic	TrnI	-	ti	RNA	TGT	G>A	1	0	1
G136_Br	G126	G136	G136	mother	female	299	brain	CV	3725	G	C	2306	1	0.0004	somatic	TrnI	-	tv	RNA	AGA	G>C	1	0	1
G132p9_M	G129	G132	G132p9	pup	female	21	muscle	CV	3727	A	G	1123	1	0.0009	somatic	TrnI	-	ti	RNA	AAT	A>G	0	1	1
G137_M	G126	G137	G137	mother	female	320	muscle	CV	3737	T	C	2840	1	0.0004	somatic	TrnI	-	ti	RNA	ATA	T>C	1	0	1
G133_Oo5	G129	G133	G133	mother	female	308	single oocyte	FS	3748	A	G	428	11	0.0257	germline	TrnI	-	ti	RNA	TAT	A>G	0	1	1
G132p2_Br	G129	G132	G132p2	pup	male	19	brain	CV	3775	G	A	2292	1	0.0004	somatic	TrnQ	-	ti	RNA	AGG	G>A	0	1	1
G132_Oo3	G129	G132	G132	mother	female	312	single oocyte	FS	3793	C	T	289	1	0.0035	germline	TrnQ	-	ti	RNA	CCT	C>T	0	1	1
G133p4_Br	G129	G133	G133p4	pup	female	19	brain	CV	3803	G	T	2611	1	0.0004	somatic	TrnQ	-	tv	RNA	AGA	G>T	0	1	1
G132p7_Br	G129	G132	G132p7	pup	female	21	brain	CV	3818	C	T	4683	1	0.0002	somatic	TrnQ	-	ti	RNA	CCG	CpG>TpG	0	1	1
G131_Br	G129	G131	G131	mother	female	291	brain	CV	3825	C	A	1912	1	0.0005	somatic	TrnQ	-	tv	RNA	ACC	C>A	0	1	1
G137p3_Oo6	G126	G137	G137p3	pup	female	17	single oocyte	FS	3825	C	T	111	1	0.009	germline	TrnQ	-	ti	RNA	ACC	C>T	1	0	1
G131p2_Br	G129	G131	G131p2	pup	male	18	brain	CV	3834	C	A	1631	1	0.0006	somatic	TrnQ	-	tv	RNA	CCT	C>A	0	1	1
G137p4_M	G126	G137	G137p4	pup	male	18	muscle	CV	3842	A	T	1181	2	0.0017	somatic	TrnQ	-	tv	RNA	TAA	A>T	1	0	1
G140p5_Br	G126	G140	G140p5	pup	female	21	brain	CV	3847	T	C	2224	1	0.0005	somatic	TrnM	-	ti	RNA	GTA	T>C	1	0	1
G139_Br	G126	G139	G139	mother	female	316	brain	CV	3855	G	A	3546	1	0.0003	somatic	TrnM	-	ti	RNA	AGC	G>A	1	1	2
G134_M	G129	G134	G134	mother	female	295	muscle	CV	3855	G	A	752	1	0.0013	somatic	TrnM	-	ti	RNA	AGC	G>A	1	1	2
G132p8_Br	G129	G132	G132p8	pup	female	21	brain	CV	3869	C	T	2765	1	0.0004	somatic	TrnM	-	ti	RNA	TCG	CpG>TpG	0	1	1
G131_M	G129	G131	G131	mother	female	291	muscle	CV	3871	G	A	1411	1	0.0007	somatic	TrnM	-	ti	RNA	GGG	G>A	0	1	1
G132_M	G129	G132	G132	mother	female	312	muscle	CV	3872	G	A	2516	1	0.0004	somatic	TrnM	-	ti	RNA	GGC	G>A	0	1	1
G140_M	G126	G140	G140	mother	female	316	muscle	CV	3882	C	A	3151	1	0.0003	somatic	TrnM	-	tv	RNA	CCG	C>A	1	0	1
G139_Br	G126	G139	G139	mother	female	316	brain	CV	3883	G	A	3549	1	0.0003	somatic	TrnM	-	ti	RNA	CGA	CpG>CpA	1	0	1
G136_Br	G126	G136	G136	mother	female	299	brain	CV	3888	C	A	2341	1	0.0004	somatic	TrnM	-	tv	RNA	ACG	C>A	1	0	1
G132p8_Br	G129	G132	G132p8	pup	female	21	brain	CV	3892	G	A	2757	1	0.0004	somatic	TrnM	-	ti	RNA	TGG	G>A	0	1	1
G132p7_Oo_pool	G129	G132	G132p7	pup	female	21	oocyte pool	CV	3905	C	A	1283	1	0.0008	germline	TrnM	-	tv	RNA	TCC	C>A	1	1	2
G137p3_Oo_pool	G126	G137	G137p3	pup	female	17	oocyte pool	CV	3905	C	A	1260	1	0.0008	germline	TrnM	-	tv	RNA	TCC	C>A	1	1	2
G132p5_M	G129	G132	G132p5	pup	female	21	muscle	CV	3908	G	C	1890	1	0.0005	somatic	TrnM	-	tv	RNA	CGT	G>C	0	1	1
G132p5_M	G129	G132	G132p5	pup	female	21	muscle	CV	3908	G	T	1890	1	0.0005	somatic	TrnM	-	tv	RNA	CGT	G>T	0	1	1
G139_Oo2	G126	G139	G139	mother	female	316	single oocyte	FS	3932	G	C	501	1	0.002	germline	ND2	nonsyn	tv	protein coding	TGC	G>C	1	0	1
G132p7_M	G129	G132	G132p7	pup	female	21	muscle	CV	3935	A	G	469	1	0.0021	somatic	ND2	nonsyn	ti	protein coding	CAT	A>G	0	1	1
G132p8_Oo_pool	G129	G132	G132p8	pup	female	21	oocyte pool	CV	3937	C	A	1095	1	0.0009	germline	ND2	nonsyn	tv	protein coding	TCA	C>A	0	1	1
G132p6_Br	G129	G132	G132p6	pup	female	21	brain	CV	3943	C	T	881	1	0.0011	somatic	ND2	syn	ti	protein coding	ACT	C>T	0	1	1
G132p9_Oo_pool	G129	G132	G132p9	pup	female	21	oocyte pool	CV	3948	C	A	2908	1	0.0003	germline	ND2	nonsyn	tv	protein coding	ACA	C>A	0	1	1
G132p6_M	G129	G132	G132p6	pup	female	21	muscle	CV	3948	C	T	1530	1	0.0007	somatic	ND2	nonsyn	ti	protein coding	ACA	C>T	0	1	1
G137p4_Br	G126	G137	G137p4	pup	male	18	brain	CV	3950	A	C	2638	1	0.0004	somatic	ND2	nonsyn	tv	protein coding	AAT	A>C	1	0	1
G132p4_Br	G129	G132	G132p4	pup	female	19	brain	CV	3952	C	A	1694	1	0.0006	somatic	ND2	nonsyn	tv	protein coding	TCT	C>A	0	1	1
G137_Br	G126	G137	G137	mother	female	320	brain	CV	3960	G	C	1505	1	0.0007	somatic	ND2	nonsyn	tv	protein coding	GGT	G>C	1	0	1
G131p2_M	G129	G131	G131p2	pup	male	18	muscle	CV	3977	T	C	2095	1	0.0005	somatic	ND2	nonsyn	ti	protein coding	ATC	T>C	0	1	1
G136_Oo6	G126	G136	G136	mother	female	299	single oocyte	FS	3985	C	T	799	1	0.0013	germline	ND2	syn	ti	protein coding	CCA	C>T	1	0	1
G132p7_Br	G129	G132	G132p7	pup	female	21	brain	CV	4001	T	G	4470	1	0.0002	somatic	ND2	nonsyn	tv	protein coding	ATG	T>G	0	1	1
G132p3_M	G129	G132	G132p3	pup	female	19	muscle	CV	4002	G	C	1834	1	0.0006	somatic	ND2	nonsyn	tv	protein coding	TGA	G>C	0	1	1
G133p3_Br	G129	G133	G133p3	pup	female	19	brain	CV	4007	G	A	3875	4	0.001	somatic	ND2	nonsyn	ti	protein coding	AGG	G>A	0	1	1
G132p1_Br	G129	G132	G132p1	pup	male	19	brain	CV	4018	C	G	1410	1	0.0007	somatic	ND2	nonsyn	tv	protein coding	TCA	C>G	0	1	1
G133_Br	G129	G133	G133	mother	female	308	brain	CV	4048	C	T	1839	1	0.0005	somatic	ND2	syn	ti	protein coding	TCA	C>T	0	1	1
G140p7_Oo3	G126	G140	G140p7	pup	female	21	single oocyte	FS	4064	C	A	446	1	0.0022	germline	ND2	nonsyn	tv	protein coding	ACG	C>A	1	0	1
G140_Br	G126	G140	G140	mother	female	316	brain	CV	4068	C	A	2283	1	0.0004	somatic	ND2	nonsyn	tv	protein coding	TCA	C>A	1	0	1
G131p3_M	G129	G131	G131p3	pup	female	18	muscle	CV	4079	G	A	2795	1	0.0004	somatic	ND2	nonsyn	ti	protein coding	AGC	G>A	0	1	1
G133_Oo1	G129	G133	G133	mother	female	308	single oocyte	FS	4094	G	A	947	1	0.0011	germline	ND2	nonsyn	ti	protein coding	CGT	CpG>CpA	1	1	2
G139_Oo4	G126	G139	G139	mother	female	316	single oocyte	FS	4094	G	A	1334	1	0.0008	germline	ND2	nonsyn	ti	protein coding	CGT	CpG>CpA	1	1	2
G136_Br	G126	G136	G136	mother	female	299	brain	CV	4109	G	A	2431	1	0.0004	somatic	ND2	nonsyn	ti	protein coding	AGC	G>A	1	0	1
G133p4_M	G129	G133	G133p4	pup	female	19	muscle	CV	4123	C	T	3513	1	0.0003	somatic	ND2	syn	ti	protein coding	TCC	C>T	0	1	1
G132p4_M	G129	G132	G132p4	pup	female	19	muscle	CV	4126	C	A	1341	1	0.0008	somatic	ND2	syn	tv	protein coding	TCC	C>A	0	1	1
G134p7_Br	G129	G134	G134p7	pup	female	18	brain	CV	4127	C	A	1051	1	0.001	somatic	ND2	nonsyn	tv	protein coding	CCT	C>A	0	1	1
G132p6_M	G129	G132	G132p6	pup	female	21	muscle	CV	4129	G	T	1568	1	0.0006	somatic	ND2	syn	tv	protein coding	TGG	G>T	0	1	1
G137p1_M	G126	G137	G137p1	pup	male	17	muscle	CV	4130	G	A	991	1	0.001	somatic	ND2	nonsyn	ti	protein coding	GGC	G>A	2	0	2
G137_Oo2	G126	G137	G137	mother	female	320	single oocyte	FS	4130	G	A	845	1	0.0012	germline	ND2	nonsyn	ti	protein coding	GGC	G>A	2	0	2
G131_Br	G129	G131	G131	mother	female	291	brain	CV	4135	C	A	2087	1	0.0005	somatic	ND2	nonsyn	tv	protein coding	TCG	C>A	0	1	1
G133p3_Br	G129	G133	G133p3	pup	female	19	brain	CV	4135	C	G	4134	1	0.0002	somatic	ND2	nonsyn	tv	protein coding	TCG	C>G	0	1	1
G132p9_Oo_pool	G129	G132	G132p9	pup	female	21	oocyte pool	CV	4182	C	G	3403	1	0.0003	germline	ND2	nonsyn	tv	protein coding	ACA	C>G	0	1	1
G133_Oo4	G129	G133	G133	mother	female	308	single oocyte	FS	4188	G	A	213	1	0.0047	germline	ND2	nonsyn	ti	protein coding	GGT	G>A	0	1	1
G134p7_M	G129	G134	G134p7	pup	female	18	muscle	CV	4208	T	C	2747	1	0.0004	somatic	ND2	syn	ti	protein coding	ATT	T>C	0	1	1
G132p9_Br	G129	G132	G132p9	pup	female	21	brain	CV	4214	G	A	1124	1	0.0009	somatic	ND2	nonsyn	ti	protein coding	AGC	G>A	0	2	2
G132p3_M	G129	G132	G132p3	pup	female	19	muscle	CV	4214	G	A	2032	1	0.0005	somatic	ND2	nonsyn	ti	protein coding	AGC	G>A	0	2	2
G133p3_Br	G129	G133	G133p3	pup	female	19	brain	CV	4217	C	A	4322	1	0.0002	somatic	ND2	nonsyn	tv	protein coding	CCT	C>A	0	1	1
G131p3_M	G129	G131	G131p3	pup	female	18	muscle	CV	4220	T	C	2784	1	0.0004	somatic	ND2	nonsyn	ti	protein coding	ATC	T>C	0	1	1
G133p3_Br	G129	G133	G133p3	pup	female	19	brain	CV	4230	T	C	4348	1	0.0002	somatic	ND2	nonsyn	ti	protein coding	CTA	T>C	0	1	1
G133p4_M	G129	G133	G133p4	pup	female	19	muscle	CV	4238	G	C	4122	5	0.0012	somatic	ND2	nonsyn	tv	protein coding	CGC	G>C	0	1	1
G137p2_Br	G126	G137	G137p2	pup	female	17	brain	CV	4238	G	A	3761	1	0.0003	somatic	ND2	nonsyn	ti	protein coding	CGC	CpG>CpA	1	2	3
G131_M	G129	G131	G131	mother	female	291	muscle	CV	4238	G	A	1554	1	0.0006	somatic	ND2	nonsyn	ti	protein coding	CGC	CpG>CpA	1	2	3
G132_M	G129	G132	G132	mother	female	312	muscle	CV	4238	G	A	3191	1	0.0003	somatic	ND2	nonsyn	ti	protein coding	CGC	CpG>CpA	1	2	3
G132_M	G129	G132	G132	mother	female	312	muscle	CV	4239	C	A	3199	1	0.0003	somatic	ND2	nonsyn	tv	protein coding	GCC	C>A	0	1	1
G139_Oo2	G126	G139	G139	mother	female	316	single oocyte	FS	4240	C	A	564	1	0.0018	germline	ND2	syn	tv	protein coding	CCC	C>A	1	0	1
G137p2_Oo_pool	G126	G137	G137p2	pup	female	17	oocyte pool	CV	4246	C	A	689	1	0.0015	germline	ND2	nonsyn	tv	protein coding	TCC	C>A	1	0	1
G132p7_Br	G129	G132	G132p7	pup	female	21	brain	CV	4252	C	A	5467	1	0.0002	somatic	ND2	nonsyn	tv	protein coding	TCT	C>A	0	1	1
G139p1_M	G126	G139	G139p1	pup	female	18	muscle	CV	4262	G	A	2023	1	0.0005	somatic	ND2	nonsyn	ti	protein coding	AGA	G>A	1	0	1
G132_Br	G129	G132	G132	mother	female	312	brain	CV	4265	G	A	845	1	0.0012	somatic	ND2	nonsyn	ti	protein coding	AGT	G>A	0	1	1
G132p2_M	G129	G132	G132p2	pup	male	19	muscle	CV	4274	G	A	3422	1	0.0003	somatic	ND2	nonsyn	ti	protein coding	AGG	G>A	0	2	2
G132_Oo3	G129	G132	G132	mother	female	312	single oocyte	FS	4274	G	A	306	1	0.0033	germline	ND2	nonsyn	ti	protein coding	AGG	G>A	0	2	2
G137_Br	G126	G137	G137	mother	female	320	brain	CV	4275	G	A	1546	1	0.0007	somatic	ND2	nonsyn	ti	protein coding	GGG	G>A	1	0	1
G140p6_Br	G126	G140	G140p6	pup	female	21	brain	CV	4276	G	A	4815	1	0.0002	somatic	ND2	syn	ti	protein coding	GGA	G>A	1	0	1
G133p1_Br	G129	G133	G133p1	pup	male	19	brain	CV	4281	C	T	753	1	0.0013	somatic	ND2	nonsyn	ti	protein coding	CCA	C>T	0	1	1
G137_Oo4	G126	G137	G137	mother	female	320	single oocyte	FS	4285	G	A	1485	1	0.0007	germline	ND2	syn	ti	protein coding	TGC	G>A	1	0	1
G131p2_M	G129	G131	G131p2	pup	male	18	muscle	CV	4292	G	C	2370	1	0.0004	somatic	ND2	nonsyn	tv	protein coding	AGG	G>C	0	1	1
G131p3_Br	G129	G131	G131p3	pup	female	18	brain	CV	4322	G	A	2994	1	0.0003	somatic	ND2	nonsyn	ti	protein coding	TGC	G>A	0	1	1
G140p7_Oo3	G126	G140	G140p7	pup	female	21	single oocyte	FS	4353	C	T	412	1	0.0024	germline	ND2	nonsyn	ti	protein coding	CCG	CpG>TpG	1	0	1
G134_Br	G129	G134	G134	mother	female	295	brain	CV	4368	C	T	145	1	0.0069	somatic	ND2	nonsyn	ti	protein coding	ACT	C>T	0	1	1
G137p2_Br	G126	G137	G137p2	pup	female	17	brain	CV	4382	C	T	3730	1	0.0003	somatic	ND2	syn	ti	protein coding	ACT	C>T	1	0	1
G136_Br	G126	G136	G136	mother	female	299	brain	CV	4385	G	A	2289	1	0.0004	somatic	ND2	nonsyn	ti	protein coding	AGC	G>A	2	1	3
G133_M	G129	G133	G133	mother	female	308	muscle	CV	4385	G	A	3239	1	0.0003	somatic	ND2	nonsyn	ti	protein coding	AGC	G>A	2	1	3
G139_Oo4	G126	G139	G139	mother	female	316	single oocyte	FS	4385	G	A	1203	1	0.0008	germline	ND2	nonsyn	ti	protein coding	AGC	G>A	2	1	3
G132p8_Oo_pool	G129	G132	G132p8	pup	female	21	oocyte pool	CV	4395	C	G	1032	1	0.001	germline	ND2	nonsyn	tv	protein coding	TCT	C>G	0	1	1
G140p5_Br	G126	G140	G140p5	pup	female	21	brain	CV	4398	T	C	2476	1	0.0004	somatic	ND2	nonsyn	ti	protein coding	ATT	T>C	1	0	1
G132p8_Br	G129	G132	G132p8	pup	female	21	brain	CV	4406	G	A	3501	3	0.0009	somatic	ND2	nonsyn	ti	protein coding	AGG	G>A	1	1	2
G136_Br	G126	G136	G136	mother	female	299	brain	CV	4406	G	A	2245	1	0.0005	somatic	ND2	nonsyn	ti	protein coding	AGG	G>A	1	1	2
G136_M	G126	G136	G136	mother	female	299	muscle	CV	4407	G	A	790	1	0.0013	somatic	ND2	nonsyn	ti	protein coding	GGG	G>A	1	0	1
G140p5_Br	G126	G140	G140p5	pup	female	21	brain	CV	4416	G	A	2442	2	0.0008	somatic	ND2	nonsyn	ti	protein coding	GGA	G>A	1	0	1
G136_M	G126	G136	G136	mother	female	299	muscle	CV	4419	G	A	776	1	0.0013	somatic	ND2	nonsyn	ti	protein coding	GGA	G>A	1	1	2
G134_Oo_pool	G129	G134	G134	mother	female	295	oocyte pool	CV	4419	G	A	244	1	0.0041	germline	ND2	nonsyn	ti	protein coding	GGA	G>A	1	1	2
G132p6_M	G129	G132	G132p6	pup	female	21	muscle	CV	4426	C	T	1621	1	0.0006	somatic	ND2	syn	ti	protein coding	ACC	C>T	0	1	1
G140_Oo2	G126	G140	G140	mother	female	316	single oocyte	FS	4446	T	C	984	1	0.001	germline	ND2	nonsyn	ti	protein coding	ATT	T>C	1	0	1
G137p2_Br	G126	G137	G137p2	pup	female	17	brain	CV	4451	G	A	3513	1	0.0003	somatic	ND2	nonsyn	ti	protein coding	AGC	G>A	1	1	2
G133_M	G129	G133	G133	mother	female	308	muscle	CV	4451	G	A	3090	1	0.0003	somatic	ND2	nonsyn	ti	protein coding	AGC	G>A	1	1	2
G137p5_Br	G126	G137	G137p5	pup	female	18	brain	CV	4456	T	C	3018	1	0.0003	somatic	ND2	syn	ti	protein coding	ATT	T>C	1	0	1
G139p2_Br	G126	G139	G139p2	pup	female	18	brain	CV	4466	G	A	1204	2	0.0017	somatic	ND2	nonsyn	ti	protein coding	TGC	G>A	1	0	1
G137_Br	G126	G137	G137	mother	female	320	brain	CV	4475	G	A	1443	1	0.0007	somatic	ND2	nonsyn	ti	protein coding	AGG	G>A	2	0	2
G140p1_Br	G126	G140	G140p1	pup	male	21	brain	CV	4475	G	A	4580	1	0.0002	somatic	ND2	nonsyn	ti	protein coding	AGG	G>A	2	0	2
G139_Br	G126	G139	G139	mother	female	316	brain	CV	4476	G	A	3942	1	0.0003	somatic	ND2	nonsyn	ti	protein coding	GGA	G>A	1	0	1
G136_Br	G126	G136	G136	mother	female	299	brain	CV	4482	T	C	2146	1	0.0005	somatic	ND2	nonsyn	ti	protein coding	ATA	T>C	1	0	1
G133_Br	G129	G133	G133	mother	female	308	brain	CV	4487	G	A	1668	1	0.0006	somatic	ND2	nonsyn	ti	protein coding	AGC	G>A	1	1	2
G137p4_M	G126	G137	G137p4	pup	male	18	muscle	CV	4487	G	A	1199	1	0.0008	somatic	ND2	nonsyn	ti	protein coding	AGC	G>A	1	1	2
G133_M	G129	G133	G133	mother	female	308	muscle	CV	4491	T	C	3079	1	0.0003	somatic	ND2	nonsyn	ti	protein coding	ATT	T>C	0	1	1
G139p2_M	G126	G139	G139p2	pup	female	18	muscle	CV	4493	C	A	1298	1	0.0008	somatic	ND2	nonsyn	tv	protein coding	TCT	C>A	1	0	1
G132_Oo3	G129	G132	G132	mother	female	312	single oocyte	FS	4509	C	A	260	1	0.0039	germline	ND2	nonsyn	tv	protein coding	TCC	C>A	0	1	1
G132p6_M	G129	G132	G132p6	pup	female	21	muscle	CV	4513	C	A	1568	1	0.0006	somatic	ND2	syn	tv	protein coding	TCA	C>A	0	1	1
G137_M	G126	G137	G137	mother	female	320	muscle	CV	4517	C	T	2853	2	0.0007	somatic	ND2	syn	ti	protein coding	TCT	C>T	1	0	1
G134_Oo_pool	G129	G134	G134	mother	female	295	oocyte pool	CV	4522	C	A	229	1	0.0044	germline	ND2	syn	tv	protein coding	TCA	C>A	0	1	1
G134p7_M	G129	G134	G134p7	pup	female	18	muscle	CV	4534	C	G	2462	1	0.0004	somatic	ND2	nonsyn	tv	protein coding	TCT	C>G	0	1	1
G140p1_M	G126	G140	G140p1	pup	male	21	muscle	CV	4540	T	C	4478	2	0.0005	somatic	ND2	syn	ti	protein coding	TTA	T>C	1	0	1
G132p9_Br	G129	G132	G132p9	pup	female	21	brain	CV	4544	C	A	1092	1	0.0009	somatic	ND2	nonsyn	tv	protein coding	TCT	C>A	0	1	1
G140_M	G126	G140	G140	mother	female	316	muscle	CV	4550	G	A	3513	1	0.0003	somatic	ND2	nonsyn	ti	protein coding	AGC	G>A	1	1	2
G134_Oo1	G129	G134	G134	mother	female	295	single oocyte	CV	4550	G	A	776	1	0.0013	germline	ND2	nonsyn	ti	protein coding	AGC	G>A	1	1	2
G134p7_M	G129	G134	G134p7	pup	female	18	muscle	CV	4598	T	C	2530	1	0.0004	somatic	ND2	nonsyn	ti	protein coding	CTC	T>C	0	1	1
G139_M	G126	G139	G139	mother	female	316	muscle	CV	4599	C	A	5160	1	0.0002	somatic	ND2	nonsyn	tv	protein coding	TCA	C>A	1	0	1
G139p1_M	G126	G139	G139p1	pup	female	18	muscle	CV	4639	T	C	1998	1	0.0005	somatic	ND2	syn	ti	protein coding	CTA	T>C	1	0	1
G137p3_Oo7	G126	G137	G137p3	pup	female	17	single oocyte	FS	4645	C	A	119	1	0.0084	germline	ND2	nonsyn	tv	protein coding	TCT	C>A	1	0	1
G132p7_Br	G129	G132	G132p7	pup	female	21	brain	CV	4670	G	A	5243	1	0.0002	somatic	ND2	nonsyn	ti	protein coding	AGG	G>A	0	1	1
G136_Br	G126	G136	G136	mother	female	299	brain	CV	4675	T	C	2345	1	0.0004	somatic	ND2	syn	ti	protein coding	TTC	T>C	1	0	1
G137p5_M	G126	G137	G137p5	pup	female	18	muscle	CV	4680	C	T	3189	1	0.0003	somatic	ND2	nonsyn	ti	protein coding	CCA	C>T	1	0	1
G137p3_M	G126	G137	G137p3	pup	female	17	muscle	CV	4688	G	T	1266	1	0.0008	somatic	ND2	nonsyn	tv	protein coding	AGG	G>T	1	0	1
G140_Br	G126	G140	G140	mother	female	316	brain	CV	4748	G	A	3154	1	0.0003	somatic	ND2	nonsyn	ti	protein coding	AGC	G>A	1	0	1
G140p1_Br	G126	G140	G140p1	pup	male	21	brain	CV	4769	G	A	4671	1	0.0002	somatic	ND2	nonsyn	ti	protein coding	AGC	G>A	1	0	1
G134_Oo1	G129	G134	G134	mother	female	295	single oocyte	CV	4786	C	A	824	1	0.0012	germline	ND2	nonsyn	tv	protein coding	TCT	C>A	0	1	1
G140_Oo2	G126	G140	G140	mother	female	316	single oocyte	FS	4788	T	C	1084	4	0.0037	germline	ND2	nonsyn	ti	protein coding	TTT	T>C	1	0	1
G132_M	G129	G132	G132	mother	female	312	muscle	CV	4797	G	A	2680	1	0.0004	somatic	ND2	nonsyn	ti	protein coding	CGC	CpG>CpA	0	2	2
G133p4_M	G129	G133	G133p4	pup	female	19	muscle	CV	4797	G	A	3941	1	0.0003	somatic	ND2	nonsyn	ti	protein coding	CGC	CpG>CpA	0	2	2
G134_M	G129	G134	G134	mother	female	295	muscle	CV	4810	C	G	798	1	0.0013	somatic	ND2	syn	tv	protein coding	CCA	C>G	0	1	1
G133p4_Br	G129	G133	G133p4	pup	female	19	brain	CV	4810	C	T	2582	1	0.0004	somatic	ND2	syn	ti	protein coding	CCA	C>T	0	1	1
G132p3_M	G129	G132	G132p3	pup	female	19	muscle	CV	4829	C	A	1918	1	0.0005	somatic	ND2	nonsyn	tv	protein coding	TCC	C>A	0	1	1
G140p6_Br	G126	G140	G140p6	pup	female	21	brain	CV	4846	A	T	4847	1	0.0002	somatic	ND2	syn	tv	protein coding	CAA	A>T	1	0	1
G132p2_Br	G129	G132	G132p2	pup	male	19	brain	CV	4857	C	A	2437	1	0.0004	somatic	ND2	nonsyn	tv	protein coding	ACT	C>A	0	1	1
G133p1_M	G129	G133	G133p1	pup	male	19	muscle	CV	4857	C	T	1003	1	0.001	somatic	ND2	nonsyn	ti	protein coding	ACT	C>T	0	1	1
G137p2_Oo4	G126	G137	G137p2	pup	female	17	single oocyte	FS	4883	C	T	397	1	0.0025	germline	ND2	syn	ti	protein coding	CCT	C>T	1	0	1
G131p2_Br	G129	G131	G131p2	pup	male	18	brain	CV	4899	T	C	1818	1	0.0006	somatic	ND2	nonsyn	ti	protein coding	CTA	T>C	0	1	1
G134_M	G129	G134	G134	mother	female	295	muscle	CV	4912	C	A	795	1	0.0013	somatic	ND2	nonsyn	tv	protein coding	GCA	C>A	0	1	1
G140p6_M	G126	G140	G140p6	pup	female	21	muscle	CV	4914	C	T	2252	1	0.0004	somatic	ND2	nonsyn	ti	protein coding	ACA	C>T	1	0	1
G132p1_Br	G129	G132	G132p1	pup	male	19	brain	CV	4931	G	A	1503	1	0.0007	somatic	ND2	nonsyn	ti	protein coding	AGC	G>A	0	1	1
G137_Br	G126	G137	G137	mother	female	320	brain	CV	4936	C	G	1707	1	0.0006	somatic	ND2	syn	tv	protein coding	CCC	C>G	1	0	1
G132p9_Oo_pool	G129	G132	G132p9	pup	female	21	oocyte pool	CV	4944	T	C	3369	1	0.0003	germline	ND2	nonsyn	ti	protein coding	ATT	T>C	0	1	1
G136_M	G126	G136	G136	mother	female	299	muscle	CV	4951	G	A	922	1	0.0011	somatic	TrnW	-	ti	RNA	AGA	G>A	1	0	1
G132p4_Br	G129	G132	G132p4	pup	female	19	brain	CV	4951	G	C	1977	1	0.0005	somatic	TrnW	-	tv	RNA	AGA	G>C	0	1	1
G140p7_Oo3	G126	G140	G140p7	pup	female	21	single oocyte	FS	4951	G	T	396	1	0.0025	germline	TrnW	-	tv	RNA	AGA	G>T	1	0	1
G137p2_M	G126	G137	G137p2	pup	female	17	muscle	CV	4955	T	C	2303	1	0.0004	somatic	TrnW	-	ti	RNA	GTT	T>C	1	0	1
G136_Br	G126	G136	G136	mother	female	299	brain	CV	4960	G	A	2494	1	0.0004	somatic	TrnW	-	ti	RNA	GGA	G>A	1	0	1
G136_M	G126	G136	G136	mother	female	299	muscle	CV	4964	T	C	916	1	0.0011	somatic	TrnW	-	ti	RNA	ATA	T>C	1	0	1
G137_Br	G126	G137	G137	mother	female	320	brain	CV	4969	G	A	1689	1	0.0006	somatic	TrnW	-	ti	RNA	AGT	G>A	1	0	1
G133_Br	G129	G133	G133	mother	female	308	brain	CV	4986	G	A	2014	1	0.0005	somatic	TrnW	-	ti	RNA	AGC	G>A	0	1	1
G134p7_M	G129	G134	G134p7	pup	female	18	muscle	CV	5005	G	T	2848	1	0.0004	somatic	TrnW	-	tv	RNA	AGT	G>T	0	1	1
G136_Br	G126	G136	G136	mother	female	299	brain	CV	5016	G	A	2492	1	0.0004	somatic	TrnW	-	ti	RNA	TGA	G>A	1	0	1
G140p5_Br	G126	G140	G140p5	pup	female	21	brain	CV	5021	G	A	2336	1	0.0004	somatic	TrnA	-	ti	RNA	AGG	G>A	1	0	1
G133_M	G129	G133	G133	mother	female	308	muscle	CV	5030	G	T	2758	1	0.0004	somatic	TrnA	-	tv	RNA	AGA	G>T	0	1	1
G132p2_M	G129	G132	G132p2	pup	male	19	muscle	CV	5060	C	A	2785	2	0.0007	somatic	TrnA	-	tv	RNA	TCA	C>A	0	1	1
G132p5_M	G129	G132	G132p5	pup	female	21	muscle	CV	5066	C	G	2017	1	0.0005	somatic	TrnA	-	tv	RNA	GCT	C>G	0	1	1
G132_M	G129	G132	G132	mother	female	312	muscle	CV	5076	G	T	2504	1	0.0004	somatic	TrnA	-	tv	RNA	AGC	G>T	0	1	1
G133_Oo1	G129	G133	G133	mother	female	308	single oocyte	FS	5081	G	T	838	1	0.0012	germline	TrnA	-	tv	RNA	AGA	G>T	0	1	1
G137p2_Br	G126	G137	G137p2	pup	female	17	brain	CV	5090	T	C	3348	1	0.0003	somatic	TrnN	-	ti	RNA	CTA	T>C	1	0	1
G133p3_M	G129	G133	G133p3	pup	female	19	muscle	CV	5100	G	A	3861	1	0.0003	somatic	TrnN	-	ti	RNA	AGG	G>A	0	1	1
G136_M	G126	G136	G136	mother	female	299	muscle	CV	5114	G	A	910	1	0.0011	somatic	TrnN	-	ti	RNA	CGA	CpG>CpA	1	0	1
G136_Br	G126	G136	G136	mother	female	299	brain	CV	5123	G	A	2516	1	0.0004	somatic	TrnN	-	ti	RNA	AGT	G>A	2	0	2
G137p2_Br	G126	G137	G137p2	pup	female	17	brain	CV	5123	G	A	3258	1	0.0003	somatic	TrnN	-	ti	RNA	AGT	G>A	2	0	2
G132_M	G129	G132	G132	mother	female	312	muscle	CV	5142	A	G	2454	1	0.0004	somatic	TrnN	-	ti	RNA	TAT	A>G	0	1	1
G137p2_M	G126	G137	G137p2	pup	female	17	muscle	CV	5149	G	A	2029	1	0.0005	somatic	TrnN	-	ti	RNA	GGC	G>A	2	0	2
G140_M	G126	G140	G140	mother	female	316	muscle	CV	5149	G	A	3220	1	0.0003	somatic	TrnN	-	ti	RNA	GGC	G>A	2	0	2
G134_Oo1	G129	G134	G134	mother	female	295	single oocyte	CV	5169	C	A	816	1	0.0012	germline	-	-	tv	-	GCC	C>A	0	1	1
G137p2_Oo6	G126	G137	G137p2	pup	female	17	single oocyte	FS	5185	G	A	137	1	0.0073	germline	-	-	ti	-	GGC	G>A	1	0	1
G131p3_M	G129	G131	G131p3	pup	female	18	muscle	CV	5189	T	C	2636	1	0.0004	somatic	-	-	ti	-	GTA	T>C	0	1	1
G131_Br	G129	G131	G131	mother	female	291	brain	CV	5205	G	A	1963	1	0.0005	somatic	TrnC	-	ti	RNA	AGA	G>A	0	1	1
G140_Br	G126	G140	G140	mother	female	316	brain	CV	5210	C	A	3164	1	0.0003	somatic	TrnC	-	tv	RNA	TCT	C>A	1	0	1
G132_M	G129	G132	G132	mother	female	312	muscle	CV	5216	A	G	2472	1	0.0004	somatic	TrnC	-	ti	RNA	CAC	A>G	0	1	1
G140p7_M	G126	G140	G140p7	pup	female	21	muscle	CV	5228	G	A	2232	7	0.0031	somatic	TrnC	-	ti	RNA	TGC	G>A	1	1	2
G133_M	G129	G133	G133	mother	female	308	muscle	CV	5228	G	A	2629	1	0.0004	somatic	TrnC	-	ti	RNA	TGC	G>A	1	1	2
G139_Oo4	G126	G139	G139	mother	female	316	single oocyte	FS	5234	C	T	1343	1	0.0007	germline	TrnC	-	ti	RNA	TCG	CpG>TpG	1	0	1
G132_M	G129	G132	G132	mother	female	312	muscle	CV	5245	T	C	2456	1	0.0004	somatic	TrnC	-	ti	RNA	ATC	T>C	0	1	1
G137_Oo2	G126	G137	G137	mother	female	320	single oocyte	FS	5252	A	G	843	1	0.0012	germline	TrnC	-	ti	RNA	TAA	A>G	1	0	1
G132p7_Oo_pool	G129	G132	G132p7	pup	female	21	oocyte pool	CV	5254	G	T	1520	2	0.0013	germline	TrnC	-	tv	RNA	AGA	G>T	0	2	2
G132p7_Oo3	G129	G132	G132p7	pup	female	21	single oocyte	FS	5254	G	T	168	1	0.006	germline	TrnC	-	tv	RNA	AGA	G>T	0	2	2
G133p3_Oo3	G129	G133	G133p3	pup	female	19	single oocyte	FS	5260	T	A	141	4	0.0284	germline	TrnY	-	tv	RNA	CTG	T>A	0	1	1
G137p4_Br	G126	G137	G137p4	pup	male	18	brain	CV	5260	T	C	2654	1	0.0004	somatic	TrnY	-	ti	RNA	CTG	T>C	1	0	1
G139_M	G126	G139	G139	mother	female	316	muscle	CV	5261	G	A	4370	1	0.0002	somatic	TrnY	-	ti	RNA	TGG	G>A	1	1	2
G133_Oo5	G129	G133	G133	mother	female	308	single oocyte	FS	5261	G	A	413	1	0.0024	germline	TrnY	-	ti	RNA	TGG	G>A	1	1	2
G139_M	G126	G139	G139	mother	female	316	muscle	CV	5262	G	A	4351	1	0.0002	somatic	TrnY	-	ti	RNA	GGT	G>A	1	0	1
G133_M	G129	G133	G133	mother	female	308	muscle	CV	5266	A	G	2738	1	0.0004	somatic	TrnY	-	ti	RNA	AAA	A>G	0	1	1
G131_M	G129	G131	G131	mother	female	291	muscle	CV	5272	G	A	1514	1	0.0007	somatic	TrnY	-	ti	RNA	GGA	G>A	0	1	1
G133_Oo5	G129	G133	G133	mother	female	308	single oocyte	FS	5316	G	A	426	2	0.0047	germline	TrnY	-	ti	RNA	AGC	G>A	0	1	1
G136_Br	G126	G136	G136	mother	female	299	brain	CV	5330	G	A	2490	1	0.0004	somatic	COX1	syn	ti	protein coding	TGT	G>A	1	0	1
G132p8_Oo_pool	G129	G132	G132p8	pup	female	21	oocyte pool	CV	5353	C	T	1101	1	0.0009	germline	COX1	nonsyn	ti	protein coding	TCA	C>T	0	1	1
G132p2_M	G129	G132	G132p2	pup	male	19	muscle	CV	5357	C	T	2908	1	0.0003	somatic	COX1	syn	ti	protein coding	CCA	C>T	0	1	1
G133p4_M	G129	G133	G133p4	pup	female	19	muscle	CV	5359	A	G	3853	1	0.0003	somatic	COX1	nonsyn	ti	protein coding	AAT	A>G	0	1	1
G132p1_Br	G129	G132	G132p1	pup	male	19	brain	CV	5374	G	A	1358	1	0.0007	somatic	COX1	nonsyn	ti	protein coding	GGA	G>A	0	1	1
G137p3_Br	G126	G137	G137p3	pup	female	17	brain	CV	5385	C	A	1009	1	0.001	somatic	COX1	nonsyn	tv	protein coding	TCT	C>A	1	1	2
G131p3_M	G129	G131	G131p3	pup	female	18	muscle	CV	5385	C	A	2710	1	0.0004	somatic	COX1	nonsyn	tv	protein coding	TCT	C>A	1	1	2
G137_M	G126	G137	G137	mother	female	320	muscle	CV	5397	G	A	2691	1	0.0004	somatic	COX1	nonsyn	ti	protein coding	AGC	G>A	1	0	1
G131_Br	G129	G131	G131	mother	female	291	brain	CV	5412	G	A	2212	1	0.0005	somatic	COX1	nonsyn	ti	protein coding	AGT	G>A	1	1	2
G139_Oo_pool	G126	G139	G139	mother	female	316	oocyte pool	CV	5412	G	A	553	1	0.0018	germline	COX1	nonsyn	ti	protein coding	AGT	G>A	1	1	2
G132p7_Oo1	G129	G132	G132p7	pup	female	21	single oocyte	FS	5414	G	T	281	1	0.0036	germline	COX1	syn	tv	protein coding	TGG	G>T	0	1	1
G133p3_M	G129	G133	G133p3	pup	female	19	muscle	CV	5442	G	A	3818	1	0.0003	somatic	COX1	nonsyn	ti	protein coding	AGC	G>A	0	1	1
G133_Br	G129	G133	G133	mother	female	308	brain	CV	5490	A	G	2062	1	0.0005	somatic	COX1	nonsyn	ti	protein coding	CAA	A>G	0	1	1
G131_M	G129	G131	G131	mother	female	291	muscle	CV	5493	G	A	1518	1	0.0007	somatic	COX1	nonsyn	ti	protein coding	TGT	G>A	0	1	1
G132_M	G129	G132	G132	mother	female	312	muscle	CV	5498	C	A	2474	1	0.0004	somatic	COX1	nonsyn	tv	protein coding	TCG	C>A	0	1	1
G134p7_M	G129	G134	G134p7	pup	female	18	muscle	CV	5498	C	T	2816	1	0.0004	somatic	COX1	syn	ti	protein coding	TCG	CpG>TpG	0	1	1
G140p7_Oo3	G126	G140	G140p7	pup	female	21	single oocyte	FS	5521	T	C	439	1	0.0023	germline	COX1	nonsyn	ti	protein coding	ATA	T>C	1	0	1
G140p5_M	G126	G140	G140p5	pup	female	21	muscle	CV	5536	T	A	2534	1	0.0004	somatic	COX1	nonsyn	tv	protein coding	GTA	T>A	1	0	1
G139p1_M	G126	G139	G139p1	pup	female	18	muscle	CV	5537	T	A	1812	4	0.0022	somatic	COX1	syn	tv	protein coding	TAA	T>A	1	0	1
G140p1_M	G126	G140	G140p1	pup	male	21	muscle	CV	5537	T	C	4168	1	0.0002	somatic	COX1	syn	ti	protein coding	TAA	T>C	1	0	1
G136_Oo3	G126	G136	G136	mother	female	299	single oocyte	FS	5554	G	T	735	1	0.0014	germline	COX1	nonsyn	tv	protein coding	GGA	G>T	1	0	1
G140p6_Oo_pool	G126	G140	G140p6	pup	female	21	oocyte pool	CV	5558	C	G	1085	1	0.0009	germline	COX1	syn	tv	protein coding	GCT	C>G	1	0	1
G140_Br	G126	G140	G140	mother	female	316	brain	CV	5562	G	A	3017	1	0.0003	somatic	COX1	nonsyn	ti	protein coding	TGG	G>A	1	0	1
G140p7_M	G126	G140	G140p7	pup	female	21	muscle	CV	5574	G	A	2205	4	0.0018	somatic	COX1	nonsyn	ti	protein coding	TGT	G>A	1	0	1
G132p5_Oo3	G129	G132	G132p5	pup	female	21	single oocyte	FS	5576	C	T	216	1	0.0046	germline	COX1	syn	ti	protein coding	TCC	C>T	0	1	1
G140_Oo4	G126	G140	G140	mother	female	316	single oocyte	FS	5591	A	G	394	1	0.0025	germline	COX1	syn	ti	protein coding	GAG	A>G	1	0	1
G131_M	G129	G131	G131	mother	female	291	muscle	CV	5592	G	A	1551	4	0.0026	somatic	COX1	nonsyn	ti	protein coding	AGC	G>A	1	2	3
G132p8_Br	G129	G132	G132p8	pup	female	21	brain	CV	5592	G	A	2612	1	0.0004	somatic	COX1	nonsyn	ti	protein coding	AGC	G>A	1	2	3
G140p1_Br	G126	G140	G140p1	pup	male	21	brain	CV	5592	G	A	4307	1	0.0002	somatic	COX1	nonsyn	ti	protein coding	AGC	G>A	1	2	3
G137p3_Oo5	G126	G137	G137p3	pup	female	17	single oocyte	FS	5598	G	A	525	1	0.0019	germline	COX1	nonsyn	ti	protein coding	AGA	G>A	1	0	1
G140_Br	G126	G140	G140	mother	female	316	brain	CV	5598	G	T	3009	1	0.0003	somatic	COX1	nonsyn	tv	protein coding	AGA	G>T	1	0	1
G140_M	G126	G140	G140	mother	female	316	muscle	CV	5604	G	A	3358	1	0.0003	somatic	COX1	nonsyn	ti	protein coding	AGC	G>A	1	0	1
G134_M	G129	G134	G134	mother	female	295	muscle	CV	5611	C	A	857	1	0.0012	somatic	COX1	nonsyn	tv	protein coding	CCA	C>A	0	1	1
G137p2_Br	G126	G137	G137p2	pup	female	17	brain	CV	5635	G	A	3257	1	0.0003	somatic	COX1	nonsyn	ti	protein coding	TGA	G>A	1	0	1
G133_Br	G129	G133	G133	mother	female	308	brain	CV	5650	C	T	1924	1	0.0005	somatic	COX1	nonsyn	ti	protein coding	TCA	C>T	0	1	1
G140p1_Br	G126	G140	G140p1	pup	male	21	brain	CV	5663	C	A	4574	1	0.0002	somatic	COX1	syn	tv	protein coding	TCC	C>A	1	0	1
G134_M	G129	G134	G134	mother	female	295	muscle	CV	5691	G	A	885	1	0.0011	somatic	COX1	nonsyn	ti	protein coding	AGC	G>A	1	1	2
G139_M	G126	G139	G139	mother	female	316	muscle	CV	5691	G	A	4675	1	0.0002	somatic	COX1	nonsyn	ti	protein coding	AGC	G>A	1	1	2
G137p4_M	G126	G137	G137p4	pup	male	18	muscle	CV	5710	T	C	1165	1	0.0009	somatic	COX1	nonsyn	ti	protein coding	GTC	T>C	1	0	1
G132p7_Br	G129	G132	G132p7	pup	female	21	brain	CV	5721	C	A	5491	1	0.0002	somatic	COX1	nonsyn	tv	protein coding	TCT	C>A	0	2	2
G131p2_M	G129	G131	G131p2	pup	male	18	muscle	CV	5721	C	A	2514	1	0.0004	somatic	COX1	nonsyn	tv	protein coding	TCT	C>A	0	2	2
G132_M	G129	G132	G132	mother	female	312	muscle	CV	5735	A	G	2520	1	0.0004	somatic	COX1	syn	ti	protein coding	TAG	A>G	0	1	1
G137_M	G126	G137	G137	mother	female	320	muscle	CV	5736	G	A	2781	1	0.0004	somatic	COX1	nonsyn	ti	protein coding	AGC	G>A	2	0	2
G137_Oo2	G126	G137	G137	mother	female	320	single oocyte	FS	5736	G	A	996	1	0.001	germline	COX1	nonsyn	ti	protein coding	AGC	G>A	2	0	2
G131p1_M	G129	G131	G131p1	pup	male	18	muscle	CV	5742	G	A	1450	1	0.0007	somatic	COX1	nonsyn	ti	protein coding	TGC	G>A	0	1	1
G132p7_Br	G129	G132	G132p7	pup	female	21	brain	CV	5748	G	A	5452	2	0.0004	somatic	COX1	nonsyn	ti	protein coding	AGC	G>A	0	1	1
G132p1_Br	G129	G132	G132p1	pup	male	19	brain	CV	5757	G	A	1481	1	0.0007	somatic	COX1	nonsyn	ti	protein coding	AGA	G>A	0	1	1
G132p6_M	G129	G132	G132p6	pup	female	21	muscle	CV	5757	G	T	1382	1	0.0007	somatic	COX1	nonsyn	tv	protein coding	AGA	G>T	0	1	1
G134_Oo_pool	G129	G134	G134	mother	female	295	oocyte pool	CV	5758	A	G	277	1	0.0036	germline	COX1	nonsyn	ti	protein coding	GAC	A>G	0	1	1
G139_Oo3	G126	G139	G139	mother	female	316	single oocyte	FS	5764	C	T	1250	1	0.0008	germline	COX1	nonsyn	ti	protein coding	ACA	C>T	1	0	1
G139_Br	G126	G139	G139	mother	female	316	brain	CV	5778	C	A	3834	1	0.0003	somatic	COX1	nonsyn	tv	protein coding	TCA	C>A	1	0	1
G136_Oo3	G126	G136	G136	mother	female	299	single oocyte	FS	5787	G	A	744	1	0.0013	germline	COX1	nonsyn	ti	protein coding	TGG	G>A	1	0	1
G136_Oo5	G126	G136	G136	mother	female	299	single oocyte	FS	5790	G	A	974	1	0.001	germline	COX1	nonsyn	ti	protein coding	AGT	G>A	1	0	1
G131_Oo5	G129	G131	G131	mother	female	291	single oocyte	FS	5796	T	C	219	1	0.0046	germline	COX1	nonsyn	ti	protein coding	ATC	T>C	0	1	1
G136_Oo_pool	G126	G136	G136	mother	female	299	oocyte pool	CV	5831	T	C	2729	1	0.0004	germline	COX1	syn	ti	protein coding	TTA	T>C	1	0	1
G139_M	G126	G139	G139	mother	female	316	muscle	CV	5848	C	A	5050	1	0.0002	somatic	COX1	nonsyn	tv	protein coding	CCA	C>A	1	0	1
G140_Br	G126	G140	G140	mother	female	316	brain	CV	5848	C	T	3394	1	0.0003	somatic	COX1	nonsyn	ti	protein coding	CCA	C>T	1	0	1
G132_M	G129	G132	G132	mother	female	312	muscle	CV	5861	G	A	2722	1	0.0004	somatic	COX1	syn	ti	protein coding	AGT	G>A	0	1	1
G136_Br	G126	G136	G136	mother	female	299	brain	CV	5861	G	C	2738	1	0.0004	somatic	COX1	nonsyn	tv	protein coding	AGT	G>C	1	0	1
G139_M	G126	G139	G139	mother	female	316	muscle	CV	5861	G	T	5119	1	0.0002	somatic	COX1	nonsyn	tv	protein coding	AGT	G>T	1	0	1
G132p1_Br	G129	G132	G132p1	pup	male	19	brain	CV	5879	T	C	1495	1	0.0007	somatic	COX1	syn	ti	protein coding	TTG	T>C	0	1	1
G136_Oo_pool	G126	G136	G136	mother	female	299	oocyte pool	CV	5880	G	A	2882	1	0.0004	germline	COX1	nonsyn	ti	protein coding	TGT	G>A	1	0	1
G140_Oo2	G126	G140	G140	mother	female	316	single oocyte	FS	5886	T	C	1287	1	0.0008	germline	COX1	nonsyn	ti	protein coding	ATC	T>C	1	0	1
G140p1_M	G126	G140	G140p1	pup	male	21	muscle	CV	5888	C	T	5131	1	0.0002	somatic	COX1	syn	ti	protein coding	CCG	CpG>TpG	1	0	1
G133p2_Br	G129	G133	G133p2	pup	male	19	brain	CV	5899	C	T	2399	1	0.0004	somatic	COX1	nonsyn	ti	protein coding	ACA	C>T	0	1	1
G133p1_M	G129	G133	G133p1	pup	male	19	muscle	CV	5901	G	T	1080	1	0.0009	somatic	COX1	nonsyn	tv	protein coding	AGC	G>T	1	1	2
G140p1_M	G126	G140	G140p1	pup	male	21	muscle	CV	5901	G	T	5114	1	0.0002	somatic	COX1	nonsyn	tv	protein coding	AGC	G>T	1	1	2
G137p1_M	G126	G137	G137p1	pup	male	17	muscle	CV	5905	T	C	1010	1	0.001	somatic	COX1	nonsyn	ti	protein coding	GTA	T>C	1	0	1
G131p2_Br	G129	G131	G131p2	pup	male	18	brain	CV	5909	G	A	1887	1	0.0005	somatic	COX1	syn	ti	protein coding	TGC	G>A	0	1	1
G133p4_M	G129	G133	G133p4	pup	female	19	muscle	CV	5919	T	G	4012	1	0.0003	somatic	COX1	nonsyn	tv	protein coding	ATC	T>G	0	1	1
G136_Oo3	G126	G136	G136	mother	female	299	single oocyte	FS	5926	C	T	806	1	0.0012	germline	COX1	nonsyn	ti	protein coding	CCA	C>T	1	0	1
G137p1_Br	G126	G137	G137p1	pup	male	17	brain	CV	5935	C	A	3041	1	0.0003	somatic	COX1	nonsyn	tv	protein coding	GCC	C>A	1	0	1
G140p7_Oo3	G126	G140	G140p7	pup	female	21	single oocyte	FS	5937	G	A	480	1	0.0021	germline	COX1	nonsyn	ti	protein coding	CGC	CpG>CpA	1	0	1
G136_Br	G126	G136	G136	mother	female	299	brain	CV	5938	C	T	2793	1	0.0004	somatic	COX1	nonsyn	ti	protein coding	GCA	C>T	1	0	1
G132p2_M	G129	G132	G132p2	pup	male	19	muscle	CV	5975	C	A	3063	1	0.0003	somatic	COX1	nonsyn	tv	protein coding	ACA	C>A	0	1	1
G137p4_Br	G126	G137	G137p4	pup	male	18	brain	CV	5988	G	T	2937	1	0.0003	somatic	COX1	nonsyn	tv	protein coding	TGA	G>T	1	0	1
G136_Br	G126	G136	G136	mother	female	299	brain	CV	5994	G	A	2822	1	0.0004	somatic	COX1	nonsyn	ti	protein coding	CGC	CpG>CpA	1	0	1
G132p7_Oo2	G129	G132	G132p7	pup	female	21	single oocyte	FS	5998	G	A	218	1	0.0046	germline	COX1	nonsyn	ti	protein coding	GGA	G>A	0	1	1
G139_M	G126	G139	G139	mother	female	316	muscle	CV	6000	G	A	5368	1	0.0002	somatic	COX1	nonsyn	ti	protein coding	AGG	G>A	1	0	1
G133_Oo1	G129	G133	G133	mother	female	308	single oocyte	FS	6003	G	A	1020	1	0.001	germline	COX1	nonsyn	ti	protein coding	AGG	G>A	0	1	1
G133_Oo1	G129	G133	G133	mother	female	308	single oocyte	FS	6007	A	G	992	1	0.001	germline	COX1	nonsyn	ti	protein coding	GAC	A>G	0	1	1
G137_M	G126	G137	G137	mother	female	320	muscle	CV	6015	C	A	2968	1	0.0003	somatic	COX1	nonsyn	tv	protein coding	TCT	C>A	1	1	2
G134_Oo1	G129	G134	G134	mother	female	295	single oocyte	CV	6015	C	A	1008	1	0.001	germline	COX1	nonsyn	tv	protein coding	TCT	C>A	1	1	2
G139_M	G126	G139	G139	mother	female	316	muscle	CV	6023	G	A	5307	1	0.0002	somatic	COX1	syn	ti	protein coding	AGC	G>A	1	0	1
G131_M	G129	G131	G131	mother	female	291	muscle	CV	6030	T	C	1634	1	0.0006	somatic	COX1	nonsyn	ti	protein coding	GTT	T>C	0	1	1
G137_M	G126	G137	G137	mother	female	320	muscle	CV	6034	G	A	2962	1	0.0003	somatic	COX1	nonsyn	ti	protein coding	TGA	G>A	1	0	1
G132p6_M	G129	G132	G132p6	pup	female	21	muscle	CV	6043	G	A	1575	1	0.0006	somatic	COX1	nonsyn	ti	protein coding	GGG	G>A	0	1	1
G132p2_Br	G129	G132	G132p2	pup	male	19	brain	CV	6044	G	A	2457	1	0.0004	somatic	COX1	syn	ti	protein coding	GGC	G>A	0	2	2
G132p8_Br	G129	G132	G132p8	pup	female	21	brain	CV	6044	G	A	3004	1	0.0003	somatic	COX1	syn	ti	protein coding	GGC	G>A	0	2	2
G132p7_Oo_pool	G129	G132	G132p7	pup	female	21	oocyte pool	CV	6054	G	C	1567	1	0.0006	germline	COX1	nonsyn	tv	protein coding	AGT	G>C	0	1	1
G133_M	G129	G133	G133	mother	female	308	muscle	CV	6071	C	A	3011	1	0.0003	somatic	COX1	syn	tv	protein coding	TCC	C>A	0	1	1
G132p7_Br	G129	G132	G132p7	pup	female	21	brain	CV	6099	G	A	5374	1	0.0002	somatic	COX1	nonsyn	ti	protein coding	AGT	G>A	0	1	1
G139p1_Oo_pool	G126	G139	G139p1	pup	female	18	oocyte pool	CV	6123	G	A	666	3	0.0045	germline	COX1	nonsyn	ti	protein coding	AGA	G>A	1	0	1
G140_Oo3	G126	G140	G140	mother	female	316	single oocyte	FS	6123	G	T	843	1	0.0012	germline	COX1	nonsyn	tv	protein coding	AGA	G>T	1	0	1
G133_Br	G129	G133	G133	mother	female	308	brain	CV	6132	G	A	2178	1	0.0005	somatic	COX1	nonsyn	ti	protein coding	CGG	CpG>CpA	0	1	1
G137p5_M	G126	G137	G137p5	pup	female	18	muscle	CV	6147	G	C	3335	1	0.0003	somatic	COX1	nonsyn	tv	protein coding	AGT	G>C	1	0	1
G131p2_M	G129	G131	G131p2	pup	male	18	muscle	CV	6151	G	A	2504	1	0.0004	somatic	COX1	nonsyn	ti	protein coding	TGA	G>A	0	1	1
G140p5_M	G126	G140	G140p5	pup	female	21	muscle	CV	6179	C	A	3183	1	0.0003	somatic	COX1	syn	tv	protein coding	GCT	C>A	1	0	1
G133p4_M	G129	G133	G133p4	pup	female	19	muscle	CV	6207	A	T	4163	1	0.0002	somatic	COX1	nonsyn	tv	protein coding	CAC	A>T	0	1	1
G140_M	G126	G140	G140	mother	female	316	muscle	CV	6214	G	T	3795	1	0.0003	somatic	COX1	nonsyn	tv	protein coding	GGA	G>T	1	0	1
G137p2_M	G126	G137	G137p2	pup	female	17	muscle	CV	6222	G	A	2343	1	0.0004	somatic	COX1	nonsyn	ti	protein coding	TGT	G>A	1	0	1
G132p3_Br	G129	G132	G132p3	pup	female	19	brain	CV	6225	G	C	1216	1	0.0008	somatic	COX1	nonsyn	tv	protein coding	AGA	G>C	0	1	1
G139p1_Br	G126	G139	G139p1	pup	female	18	brain	CV	6231	C	A	1345	1	0.0007	somatic	COX1	nonsyn	tv	protein coding	ACG	C>A	1	0	1
G132p3_Br	G129	G132	G132p3	pup	female	19	brain	CV	6244	C	A	1216	1	0.0008	somatic	COX1	nonsyn	tv	protein coding	ACA	C>A	0	1	1
G133p3_Br	G129	G133	G133p3	pup	female	19	brain	CV	6250	C	A	4580	1	0.0002	somatic	COX1	nonsyn	tv	protein coding	GCC	C>A	0	1	1
G132p7_Br	G129	G132	G132p7	pup	female	21	brain	CV	6263	C	A	5598	1	0.0002	somatic	COX1	nonsyn	tv	protein coding	TCG	C>A	0	1	1
G134p7_M	G129	G134	G134p7	pup	female	18	muscle	CV	6265	C	T	2948	1	0.0003	somatic	COX1	nonsyn	ti	protein coding	GCA	C>T	0	1	1
G133p2_M	G129	G133	G133p2	pup	male	19	muscle	CV	6275	C	G	913	1	0.0011	somatic	COX1	syn	tv	protein coding	CCG	C>G	0	1	1
G139_Br	G126	G139	G139	mother	female	316	brain	CV	6300	G	A	4220	1	0.0002	somatic	COX1	nonsyn	ti	protein coding	TGC	G>A	1	0	1
G139p1_M	G126	G139	G139p1	pup	female	18	muscle	CV	6309	C	A	2122	1	0.0005	somatic	COX1	nonsyn	tv	protein coding	ACA	C>A	1	0	1
G131_Br	G129	G131	G131	mother	female	291	brain	CV	6312	G	T	2318	1	0.0004	somatic	COX1	nonsyn	tv	protein coding	CGG	G>T	0	1	1
G139_Br	G126	G139	G139	mother	female	316	brain	CV	6315	G	A	4223	1	0.0002	somatic	COX1	nonsyn	ti	protein coding	AGG	G>A	1	0	1
G137_Br	G126	G137	G137	mother	female	320	brain	CV	6336	G	A	1749	1	0.0006	somatic	COX1	nonsyn	ti	protein coding	AGC	G>A	1	1	2
G132_M	G129	G132	G132	mother	female	312	muscle	CV	6336	G	A	2766	1	0.0004	somatic	COX1	nonsyn	ti	protein coding	AGC	G>A	1	1	2
G139p2_Br	G126	G139	G139p2	pup	female	18	brain	CV	6356	C	G	1438	1	0.0007	somatic	COX1	syn	tv	protein coding	GCT	C>G	1	0	1
G140p6_Br	G126	G140	G140p6	pup	female	21	brain	CV	6388	C	A	5018	1	0.0002	somatic	COX1	nonsyn	tv	protein coding	ACC	C>A	1	0	1
G133p2_M	G129	G133	G133p2	pup	male	19	muscle	CV	6388	C	G	909	1	0.0011	somatic	COX1	nonsyn	tv	protein coding	ACC	C>G	0	1	1
G139_Br	G126	G139	G139	mother	female	316	brain	CV	6404	C	T	4053	1	0.0003	somatic	COX1	syn	ti	protein coding	CCA	C>T	1	0	1
G134p7_M	G129	G134	G134p7	pup	female	18	muscle	CV	6417	G	T	2965	1	0.0003	somatic	COX1	nonsyn	tv	protein coding	TGA	G>T	0	1	1
G139_Br	G126	G139	G139	mother	female	316	brain	CV	6423	G	A	4087	1	0.0002	somatic	COX1	nonsyn	ti	protein coding	CGT	CpG>CpA	1	0	1
G136_M	G126	G136	G136	mother	female	299	muscle	CV	6432	G	A	859	1	0.0012	somatic	COX1	nonsyn	ti	protein coding	CGA	CpG>CpA	1	0	1
G136_Br	G126	G136	G136	mother	female	299	brain	CV	6443	T	C	2645	1	0.0004	somatic	COX1	syn	ti	protein coding	ATG	T>C	1	0	1
G140_Br	G126	G140	G140	mother	female	316	brain	CV	6459	C	A	3783	1	0.0003	somatic	COX1	nonsyn	tv	protein coding	CCA	C>A	1	0	1
G136_Br	G126	G136	G136	mother	female	299	brain	CV	6464	T	C	2640	1	0.0004	somatic	COX1	syn	ti	protein coding	ATG	T>C	1	0	1
G133_Oo1	G129	G133	G133	mother	female	308	single oocyte	FS	6465	G	A	1040	1	0.001	germline	COX1	nonsyn	ti	protein coding	TGT	G>A	0	1	1
G133p4_Br	G129	G133	G133p4	pup	female	19	brain	CV	6465	G	C	2826	1	0.0004	somatic	COX1	nonsyn	tv	protein coding	TGT	G>C	0	1	1
G132p7_Br	G129	G132	G132p7	pup	female	21	brain	CV	6468	C	A	5281	2	0.0004	somatic	COX1	nonsyn	tv	protein coding	TCT	C>A	0	1	1
G136_Br	G126	G136	G136	mother	female	299	brain	CV	6478	G	A	2630	1	0.0004	somatic	COX1	nonsyn	ti	protein coding	GGA	G>A	1	0	1
G132_M	G129	G132	G132	mother	female	312	muscle	CV	6480	G	A	2739	1	0.0004	somatic	COX1	nonsyn	ti	protein coding	AGC	G>A	0	1	1
G137_Oo4	G126	G137	G137	mother	female	320	single oocyte	FS	6481	C	T	1578	1	0.0006	germline	COX1	nonsyn	ti	protein coding	GCA	C>T	1	0	1
G132p5_M	G129	G132	G132p5	pup	female	21	muscle	CV	6485	G	A	1922	1	0.0005	somatic	COX1	syn	ti	protein coding	TGT	G>A	0	1	1
G137p3_Oo5	G126	G137	G137p3	pup	female	17	single oocyte	FS	6510	C	A	600	1	0.0017	germline	COX1	nonsyn	tv	protein coding	TCA	C>A	1	0	1
G140p6_M	G126	G140	G140p6	pup	female	21	muscle	CV	6531	G	A	2064	1	0.0005	somatic	COX1	nonsyn	ti	protein coding	AGG	G>A	1	0	1
G132p8_M	G129	G132	G132p8	pup	female	21	muscle	CV	6543	G	A	1668	1	0.0006	somatic	COX1	nonsyn	ti	protein coding	AGA	G>A	0	1	1
G131p1_Br	G129	G131	G131p1	pup	male	18	brain	CV	6556	C	A	940	1	0.0011	somatic	COX1	nonsyn	tv	protein coding	GCA	C>A	0	1	1
G134p7_Br	G129	G134	G134p7	pup	female	18	brain	CV	6556	C	G	1136	1	0.0009	somatic	COX1	nonsyn	tv	protein coding	GCA	C>G	0	1	1
G139_M	G126	G139	G139	mother	female	316	muscle	CV	6560	A	G	4999	1	0.0002	somatic	COX1	syn	ti	protein coding	AAG	A>G	1	0	1
G131p3_Br	G129	G131	G131p3	pup	female	18	brain	CV	6575	C	A	2787	1	0.0004	somatic	COX1	nonsyn	tv	protein coding	TCA	C>A	0	1	1
G140_M	G126	G140	G140	mother	female	316	muscle	CV	6582	G	A	3433	1	0.0003	somatic	COX1	nonsyn	ti	protein coding	CGT	CpG>CpA	1	0	1
G132_Br	G129	G132	G132	mother	female	312	brain	CV	6588	G	A	830	1	0.0012	somatic	COX1	nonsyn	ti	protein coding	AGT	G>A	0	1	1
G134p7_M	G129	G134	G134p7	pup	female	18	muscle	CV	6598	C	G	2701	1	0.0004	somatic	COX1	nonsyn	tv	protein coding	ACA	C>G	0	1	1
G134p7_Br	G129	G134	G134p7	pup	female	18	brain	CV	6616	T	C	1118	1	0.0009	somatic	COX1	nonsyn	ti	protein coding	TTC	T>C	0	1	1
G140p5_Br	G126	G140	G140p5	pup	female	21	brain	CV	6620	G	A	2484	1	0.0004	somatic	COX1	syn	ti	protein coding	TGG	G>A	1	0	1
G132p3_M	G129	G132	G132p3	pup	female	19	muscle	CV	6622	G	A	2006	1	0.0005	somatic	COX1	nonsyn	ti	protein coding	GGC	G>A	0	1	1
G132p7_Br	G129	G132	G132p7	pup	female	21	brain	CV	6623	C	A	5363	1	0.0002	somatic	COX1	syn	tv	protein coding	GCC	C>A	0	1	1
G133p2_M	G129	G133	G133p2	pup	male	19	muscle	CV	6630	G	A	932	1	0.0011	somatic	COX1	nonsyn	ti	protein coding	AGG	G>A	0	1	1
G133_Oo2	G129	G133	G133	mother	female	308	single oocyte	FS	6631	G	A	404	1	0.0025	germline	COX1	nonsyn	ti	protein coding	GGA	G>A	0	1	1
G134p7_Oo4	G129	G134	G134p7	pup	female	18	single oocyte	CV	6651	G	T	266	1	0.0038	germline	COX1	nonsyn	tv	protein coding	AGA	G>T	0	1	1
G133_Br	G129	G133	G133	mother	female	308	brain	CV	6660	G	A	1949	1	0.0005	somatic	COX1	nonsyn	ti	protein coding	AGA	G>A	1	1	2
G137p3_Br	G126	G137	G137p3	pup	female	17	brain	CV	6660	G	A	1102	1	0.0009	somatic	COX1	nonsyn	ti	protein coding	AGA	G>A	1	1	2
G139p1_Br	G126	G139	G139p1	pup	female	18	brain	CV	6667	A	T	1310	1	0.0008	somatic	COX1	nonsyn	tv	protein coding	TAC	A>T	1	0	1
G132p7_Br	G129	G132	G132p7	pup	female	21	brain	CV	6676	G	A	5376	4	0.0007	somatic	COX1	nonsyn	ti	protein coding	TGA	G>A	0	1	1
G132p8_Oo_pool	G129	G132	G132p8	pup	female	21	oocyte pool	CV	6684	G	A	1155	1	0.0009	germline	COX1	nonsyn	ti	protein coding	TGT	G>A	0	1	1
G137p1_Br	G126	G137	G137p1	pup	male	17	brain	CV	6688	C	A	3107	1	0.0003	somatic	COX1	nonsyn	tv	protein coding	TCT	C>A	1	0	1
G131_Br	G129	G131	G131	mother	female	291	brain	CV	6691	C	A	2102	1	0.0005	somatic	COX1	nonsyn	tv	protein coding	TCT	C>A	0	1	1
G133p3_Br	G129	G133	G133p3	pup	female	19	brain	CV	6696	G	T	4392	1	0.0002	somatic	COX1	nonsyn	tv	protein coding	AGG	G>T	0	1	1
G140p1_M	G126	G140	G140p1	pup	male	21	muscle	CV	6717	G	T	5109	1	0.0002	somatic	COX1	nonsyn	tv	protein coding	AGC	G>T	1	0	1
G131p1_Br	G129	G131	G131p1	pup	male	18	brain	CV	6734	C	A	941	1	0.0011	somatic	COX1	nonsyn	tv	protein coding	TCT	C>A	0	2	2
G133_Br	G129	G133	G133	mother	female	308	brain	CV	6734	C	A	1896	1	0.0005	somatic	COX1	nonsyn	tv	protein coding	TCT	C>A	0	2	2
G134_M	G129	G134	G134	mother	female	295	muscle	CV	6750	G	T	870	1	0.0012	somatic	COX1	nonsyn	tv	protein coding	GGC	G>T	0	1	1
G137p3_Oo5	G126	G137	G137p3	pup	female	17	single oocyte	FS	6784	C	T	539	1	0.0019	germline	COX1	nonsyn	ti	protein coding	TCG	CpG>TpG	1	0	1
G132_M	G129	G132	G132	mother	female	312	muscle	CV	6816	G	A	3006	1	0.0003	somatic	COX1	nonsyn	ti	protein coding	TGG	G>A	0	1	1
G133_Oo4	G129	G133	G133	mother	female	308	single oocyte	FS	6824	T	C	203	1	0.0049	germline	COX1	syn	ti	protein coding	CTC	T>C	0	1	1
G134_M	G129	G134	G134	mother	female	295	muscle	CV	6837	A	G	819	1	0.0012	somatic	COX1	nonsyn	ti	protein coding	CAC	A>G	0	1	1
G133_Oo2	G129	G133	G133	mother	female	308	single oocyte	FS	6848	A	G	345	1	0.0029	germline	COX1	syn	ti	protein coding	AAC	A>G	0	1	1
G132p8_Oo_pool	G129	G132	G132p8	pup	female	21	oocyte pool	CV	6849	C	T	1045	1	0.001	germline	COX1	nonsyn	ti	protein coding	ACC	C>T	0	1	1
G139p2_M	G126	G139	G139p2	pup	female	18	muscle	CV	6858	G	T	1308	1	0.0008	somatic	COX1	nonsyn	tv	protein coding	TGT	G>T	1	0	1
G139_M	G126	G139	G139	mother	female	316	muscle	CV	6862	A	G	4891	1	0.0002	somatic	COX1	nonsyn	ti	protein coding	AAA	A>G	1	0	1
G140_M	G126	G140	G140	mother	female	316	muscle	CV	6878	G	A	3536	1	0.0003	somatic	TrnS1	-	ti	RNA	GGA	G>A	1	0	1
G139_Br	G126	G139	G139	mother	female	316	brain	CV	6887	G	A	4084	1	0.0002	somatic	TrnS1	-	ti	RNA	CGA	CpG>CpA	1	0	1
G132p6_M	G129	G132	G132p6	pup	female	21	muscle	CV	6887	G	T	1538	1	0.0007	somatic	TrnS1	-	tv	RNA	CGA	G>T	0	1	1
G139p2_Br	G126	G139	G139p2	pup	female	18	brain	CV	6907	C	A	1274	1	0.0008	somatic	TrnS1	-	tv	RNA	TCA	C>A	1	0	1
G140_Oo4	G126	G140	G140	mother	female	316	single oocyte	FS	6912	C	A	409	1	0.0024	germline	TrnS1	-	tv	RNA	CCA	C>A	1	0	1
G133p2_M	G129	G133	G133p2	pup	male	19	muscle	CV	6923	C	A	933	1	0.0011	somatic	TrnS1	-	tv	RNA	TCC	C>A	0	1	1
G132_M	G129	G132	G132	mother	female	312	muscle	CV	6936	C	A	3105	1	0.0003	somatic	TrnS1	-	tv	RNA	TCT	C>A	0	1	1
G137_Br	G126	G137	G137	mother	female	320	brain	CV	6944	G	A	1524	1	0.0007	somatic	TrnD	-	ti	RNA	AGA	G>A	1	0	1
G133p3_M	G129	G133	G133p3	pup	female	19	muscle	CV	6944	G	C	4812	1	0.0002	somatic	TrnD	-	tv	RNA	AGA	G>C	0	1	1
G139_Br	G126	G139	G139	mother	female	316	brain	CV	6944	G	T	4108	1	0.0002	somatic	TrnD	-	tv	RNA	AGA	G>T	1	0	1
G133_M	G129	G133	G133	mother	female	308	muscle	CV	6948	T	A	3295	1	0.0003	somatic	TrnD	-	tv	RNA	ATT	T>A	0	1	1
G140_Br	G126	G140	G140	mother	female	316	brain	CV	6973	G	A	3502	1	0.0003	somatic	TrnD	-	ti	RNA	TGT	G>A	1	0	1
G132p1_M	G129	G132	G132p1	pup	male	19	muscle	CV	6975	C	A	1648	1	0.0006	somatic	TrnD	-	tv	RNA	TCA	C>A	0	1	1
G140p1_Br	G126	G140	G140p1	pup	male	21	brain	CV	7000	C	G	4767	1	0.0002	somatic	TrnD	-	tv	RNA	TCT	C>G	1	1	2
G132p5_Oo_pool	G129	G132	G132p5	pup	female	21	oocyte pool	CV	7000	C	G	1867	1	0.0005	germline	TrnD	-	tv	RNA	TCT	C>G	1	1	2
G132p1_Br	G129	G132	G132p1	pup	male	19	brain	CV	7021	C	A	1424	1	0.0007	somatic	COX2	nonsyn	tv	protein coding	ACC	C>A	0	1	1
G133_Br	G129	G133	G133	mother	female	308	brain	CV	7021	C	T	1766	1	0.0006	somatic	COX2	syn	ti	protein coding	ACC	C>T	0	1	1
G139_M	G126	G139	G139	mother	female	316	muscle	CV	7046	G	A	4974	1	0.0002	somatic	COX2	nonsyn	ti	protein coding	CGC	CpG>CpA	1	0	1
G140p5_Br	G126	G140	G140p5	pup	female	21	brain	CV	7054	C	T	2458	1	0.0004	somatic	COX2	syn	ti	protein coding	CCC	C>T	1	0	1
G140p5_M	G126	G140	G140p5	pup	female	21	muscle	CV	7057	T	C	2888	1	0.0004	somatic	COX2	syn	ti	protein coding	CTA	T>C	1	0	1
G140_Br	G126	G140	G140	mother	female	316	brain	CV	7067	G	A	3566	1	0.0003	somatic	COX2	nonsyn	ti	protein coding	AGA	G>A	1	0	1
G140p6_M	G126	G140	G140p6	pup	female	21	muscle	CV	7067	G	T	2243	1	0.0005	somatic	COX2	nonsyn	tv	protein coding	AGA	G>T	1	0	1
G132_Oo2	G129	G132	G132	mother	female	312	single oocyte	FS	7111	A	G	46	1	0.0217	germline	COX2	syn	ti	protein coding	TAA	A>G	0	1	1
G132p9_Br	G129	G132	G132p9	pup	female	21	brain	CV	7116	G	A	1110	1	0.0009	somatic	COX2	nonsyn	ti	protein coding	AGC	G>A	1	2	3
G137p2_Br	G126	G137	G137p2	pup	female	17	brain	CV	7116	G	A	3631	1	0.0003	somatic	COX2	nonsyn	ti	protein coding	AGC	G>A	1	2	3
G131_M	G129	G131	G131	mother	female	291	muscle	CV	7116	G	A	1526	1	0.0007	somatic	COX2	nonsyn	ti	protein coding	AGC	G>A	1	2	3
G139_Oo2	G126	G139	G139	mother	female	316	single oocyte	FS	7148	T	C	559	1	0.0018	germline	COX2	syn	ti	protein coding	ATT	T>C	1	0	1
G133p4_M	G129	G133	G133p4	pup	female	19	muscle	CV	7151	A	G	4557	1	0.0002	somatic	COX2	nonsyn	ti	protein coding	AAC	A>G	0	1	1
G137p1_M	G126	G137	G137p1	pup	male	17	muscle	CV	7171	A	G	1047	1	0.001	somatic	COX2	syn	ti	protein coding	CAA	A>G	1	0	1
G133_Oo1	G129	G133	G133	mother	female	308	single oocyte	FS	7173	G	A	894	1	0.0011	germline	COX2	nonsyn	ti	protein coding	AGC	G>A	0	1	1
G136_Oo5	G126	G136	G136	mother	female	299	single oocyte	FS	7206	G	T	876	1	0.0011	germline	COX2	nonsyn	tv	protein coding	TGA	G>T	1	0	1
G134p7_Oo4	G129	G134	G134p7	pup	female	18	single oocyte	CV	7227	T	C	226	1	0.0044	germline	COX2	nonsyn	ti	protein coding	ATC	T>C	0	1	1
G133p4_Br	G129	G133	G133p4	pup	female	19	brain	CV	7240	T	C	2851	1	0.0004	somatic	COX2	syn	ti	protein coding	TTG	T>C	0	1	1
G140p6_Oo_pool	G126	G140	G140p6	pup	female	21	oocyte pool	CV	7242	C	A	1084	1	0.0009	germline	COX2	nonsyn	tv	protein coding	GCT	C>A	1	0	1
G137p2_Br	G126	G137	G137p2	pup	female	17	brain	CV	7247	C	A	3726	1	0.0003	somatic	COX2	nonsyn	tv	protein coding	CCC	C>A	1	0	1
G140p5_Br	G126	G140	G140p5	pup	female	21	brain	CV	7274	G	A	2509	1	0.0004	somatic	COX2	nonsyn	ti	protein coding	AGA	G>A	1	0	1
G131p3_Br	G129	G131	G131p3	pup	female	18	brain	CV	7292	G	A	2796	1	0.0004	somatic	COX2	nonsyn	ti	protein coding	CGT	CpG>CpA	0	1	1
G140p6_Br	G126	G140	G140p6	pup	female	21	brain	CV	7301	G	A	5005	2	0.0004	somatic	COX2	nonsyn	ti	protein coding	CGT	CpG>CpA	1	0	1
G134p7_M	G129	G134	G134p7	pup	female	18	muscle	CV	7316	C	A	2611	1	0.0004	somatic	COX2	nonsyn	tv	protein coding	GCA	C>A	0	1	1
G137p3_M	G126	G137	G137p3	pup	female	17	muscle	CV	7362	G	A	1222	1	0.0008	somatic	COX2	nonsyn	ti	protein coding	TGC	G>A	1	0	1
G132p1_M	G129	G132	G132p1	pup	male	19	muscle	CV	7367	G	T	1596	1	0.0006	somatic	COX2	nonsyn	tv	protein coding	TGA	G>T	0	1	1
G137p2_Oo4	G126	G137	G137p2	pup	female	17	single oocyte	FS	7371	C	T	391	1	0.0026	germline	COX2	nonsyn	ti	protein coding	TCA	C>T	1	0	1
G132p2_M	G129	G132	G132p2	pup	male	19	muscle	CV	7375	T	C	3182	1	0.0003	somatic	COX2	syn	ti	protein coding	ATA	T>C	0	1	1
G139_Br	G126	G139	G139	mother	female	316	brain	CV	7391	G	A	3691	1	0.0003	somatic	COX2	nonsyn	ti	protein coding	CGA	CpG>CpA	1	0	1
G139_Oo3	G126	G139	G139	mother	female	316	single oocyte	FS	7391	G	T	1281	1	0.0008	germline	COX2	nonsyn	tv	protein coding	CGA	G>T	1	0	1
G140_M	G126	G140	G140	mother	female	316	muscle	CV	7392	A	G	3585	1	0.0003	somatic	COX2	nonsyn	ti	protein coding	GAC	A>G	1	0	1
G133p2_Br	G129	G133	G133p2	pup	male	19	brain	CV	7401	C	T	2594	1	0.0004	somatic	COX2	nonsyn	ti	protein coding	CCT	C>T	1	1	2
G140p6_Oo3	G126	G140	G140p6	pup	female	21	single oocyte	FS	7401	C	T	629	1	0.0016	germline	COX2	nonsyn	ti	protein coding	CCT	C>T	1	1	2
G137p1_Br	G126	G137	G137p1	pup	male	17	brain	CV	7404	G	A	3209	1	0.0003	somatic	COX2	nonsyn	ti	protein coding	GGT	G>A	1	0	1
G137p2_Br	G126	G137	G137p2	pup	female	17	brain	CV	7421	G	T	3460	1	0.0003	somatic	COX2	nonsyn	tv	protein coding	AGA	G>T	1	0	1
G134p7_M	G129	G134	G134p7	pup	female	18	muscle	CV	7444	G	T	2614	1	0.0004	somatic	COX2	syn	tv	protein coding	TGC	G>T	0	1	1
G140p6_Br	G126	G140	G140p6	pup	female	21	brain	CV	7446	C	T	4668	1	0.0002	somatic	COX2	nonsyn	ti	protein coding	CCA	C>T	1	0	1
G140_Br	G126	G140	G140	mother	female	316	brain	CV	7451	G	T	3513	1	0.0003	somatic	COX2	nonsyn	tv	protein coding	AGA	G>T	1	0	1
G137p3_M	G126	G137	G137p3	pup	female	17	muscle	CV	7457	C	G	1133	1	0.0009	somatic	COX2	nonsyn	tv	protein coding	TCC	C>G	1	0	1
G132p9_M	G129	G132	G132p9	pup	female	21	muscle	CV	7461	T	C	1254	1	0.0008	somatic	COX2	nonsyn	ti	protein coding	ATC	T>C	0	1	1
G137_M	G126	G137	G137	mother	female	320	muscle	CV	7484	G	A	2576	1	0.0004	somatic	COX2	nonsyn	ti	protein coding	AGA	G>A	1	0	1
G131p3_Br	G129	G131	G131p3	pup	female	18	brain	CV	7487	G	A	2482	1	0.0004	somatic	COX2	nonsyn	ti	protein coding	CGT	CpG>CpA	0	1	1
G131_Oo6	G129	G131	G131	mother	female	291	single oocyte	FS	7500	G	T	107	1	0.0094	germline	COX2	nonsyn	tv	protein coding	TGA	G>T	0	1	1
G137_Oo4	G126	G137	G137	mother	female	320	single oocyte	FS	7502	G	A	1585	1	0.0006	germline	COX2	nonsyn	ti	protein coding	AGC	G>A	1	0	1
G132p7_Oo_pool	G129	G132	G132p7	pup	female	21	oocyte pool	CV	7502	G	T	1669	1	0.0006	germline	COX2	nonsyn	tv	protein coding	AGC	G>T	0	1	1
G132p5_Oo2	G129	G132	G132p5	pup	female	21	single oocyte	FS	7514	C	A	174	1	0.0058	germline	COX2	nonsyn	tv	protein coding	CCT	C>A	0	1	1
G132_M	G129	G132	G132	mother	female	312	muscle	CV	7517	G	A	2637	1	0.0004	somatic	COX2	nonsyn	ti	protein coding	AGG	G>A	0	1	1
G133p3_M	G129	G133	G133p3	pup	female	19	muscle	CV	7542	G	A	3932	1	0.0003	somatic	COX2	nonsyn	ti	protein coding	GGC	G>A	2	1	3
G139p1_M	G126	G139	G139p1	pup	female	18	muscle	CV	7542	G	A	1903	1	0.0005	somatic	COX2	nonsyn	ti	protein coding	GGC	G>A	2	1	3
G140p6_Oo_pool	G126	G140	G140p6	pup	female	21	oocyte pool	CV	7542	G	A	1190	1	0.0008	germline	COX2	nonsyn	ti	protein coding	GGC	G>A	2	1	3
G132p2_M	G129	G132	G132p2	pup	male	19	muscle	CV	7545	G	A	3049	1	0.0003	somatic	COX2	nonsyn	ti	protein coding	CGA	CpG>CpA	1	1	2
G139_M	G126	G139	G139	mother	female	316	muscle	CV	7545	G	A	4632	1	0.0002	somatic	COX2	nonsyn	ti	protein coding	CGA	CpG>CpA	1	1	2
G134_M	G129	G134	G134	mother	female	295	muscle	CV	7545	G	T	927	1	0.0011	somatic	COX2	nonsyn	tv	protein coding	CGA	G>T	1	1	2
G137p2_M	G126	G137	G137p2	pup	female	17	muscle	CV	7545	G	T	2149	1	0.0005	somatic	COX2	nonsyn	tv	protein coding	CGA	G>T	1	1	2
G139_Br	G126	G139	G139	mother	female	316	brain	CV	7556	G	A	3617	1	0.0003	somatic	COX2	nonsyn	ti	protein coding	AGC	G>A	1	0	1
G131_Br	G129	G131	G131	mother	female	291	brain	CV	7582	G	A	2109	1	0.0005	somatic	COX2	syn	ti	protein coding	GGT	G>A	0	1	1
G132p7_Br	G129	G132	G132p7	pup	female	21	brain	CV	7593	G	C	5132	1	0.0002	somatic	COX2	nonsyn	tv	protein coding	GGC	G>C	0	1	1
G134p7_M	G129	G134	G134p7	pup	female	18	muscle	CV	7602	C	G	2583	1	0.0004	somatic	COX2	nonsyn	tv	protein coding	TCT	C>G	0	1	1
G139p1_M	G126	G139	G139p1	pup	female	18	muscle	CV	7611	G	C	1925	1	0.0005	somatic	COX2	nonsyn	tv	protein coding	TGT	G>C	1	0	1
G132p5_M	G129	G132	G132p5	pup	female	21	muscle	CV	7633	G	A	1880	3	0.0016	somatic	COX2	syn	ti	protein coding	TGC	G>A	0	1	1
G132p3_M	G129	G132	G132p3	pup	female	19	muscle	CV	7642	C	T	1880	2	0.0011	somatic	COX2	syn	ti	protein coding	TCC	C>T	0	1	1
G134_Oo1	G129	G134	G134	mother	female	295	single oocyte	CV	7652	G	A	864	1	0.0012	germline	COX2	nonsyn	ti	protein coding	GGT	G>A	0	1	1
G132p8_Br	G129	G132	G132p8	pup	female	21	brain	CV	7670	G	A	2724	1	0.0004	somatic	COX2	nonsyn	ti	protein coding	CGA	CpG>CpA	2	1	3
G136_Br	G126	G136	G136	mother	female	299	brain	CV	7670	G	A	2484	1	0.0004	somatic	COX2	nonsyn	ti	protein coding	CGA	CpG>CpA	2	1	3
G137_Oo4	G126	G137	G137	mother	female	320	single oocyte	FS	7670	G	A	1541	1	0.0007	germline	COX2	nonsyn	ti	protein coding	CGA	CpG>CpA	2	1	3
G132_Br	G129	G132	G132	mother	female	312	brain	CV	7677	G	A	812	1	0.0012	somatic	COX2	nonsyn	ti	protein coding	TGA	G>A	0	1	1
G131_Br	G129	G131	G131	mother	female	291	brain	CV	7716	G	A	2015	1	0.0005	somatic	TrnK	-	ti	RNA	AGC	G>A	0	1	1
G133_M	G129	G133	G133	mother	female	308	muscle	CV	7731	G	A	2666	1	0.0004	somatic	TrnK	-	ti	RNA	AGT	G>A	0	1	1
G132p9_Br	G129	G132	G132p9	pup	female	21	brain	CV	7731	G	T	1027	1	0.001	somatic	TrnK	-	tv	RNA	AGT	G>T	0	1	1
G132_Br	G129	G132	G132	mother	female	312	brain	CV	7759	T	C	743	1	0.0014	somatic	TrnK	-	ti	RNA	ATA	T>C	0	1	1
G140p1_Br	G126	G140	G140p1	pup	male	21	brain	CV	7763	G	T	4322	1	0.0002	somatic	TrnK	-	tv	RNA	TGA	G>T	1	0	1
G140p1_Br	G126	G140	G140p1	pup	male	21	brain	CV	7766	A	T	4331	1	0.0002	somatic	ATP8	nonsyn	tv	protein coding	TAT	A>T	1	0	1
G131_M	G129	G131	G131	mother	female	291	muscle	CV	7768	G	A	1376	1	0.0007	somatic	ATP8	syn	ti	protein coding	TGC	G>A	0	1	1
G131_Br	G129	G131	G131	mother	female	291	brain	CV	7769	C	A	1977	1	0.0005	somatic	ATP8	nonsyn	tv	protein coding	GCC	C>A	0	1	1
G133p4_M	G129	G133	G133p4	pup	female	19	muscle	CV	7769	C	G	3721	1	0.0003	somatic	ATP8	nonsyn	tv	protein coding	GCC	C>G	0	1	1
G137p5_M	G126	G137	G137p5	pup	female	18	muscle	CV	7770	C	A	2844	1	0.0004	somatic	ATP8	nonsyn	tv	protein coding	CCA	C>A	1	0	1
G133_Br	G129	G133	G133	mother	female	308	brain	CV	7772	C	T	1932	1	0.0005	somatic	ATP8	nonsyn	ti	protein coding	ACA	C>T	0	1	1
G137p5_Br	G126	G137	G137p5	pup	female	18	brain	CV	7800	C	A	2642	1	0.0004	somatic	ATP8	nonsyn	tv	protein coding	ACA	C>A	1	0	1
G140_M	G126	G140	G140	mother	female	316	muscle	CV	7822	C	A	3334	1	0.0003	somatic	ATP8	syn	tv	protein coding	CCC	C>A	1	0	1
G139_Oo2	G126	G139	G139	mother	female	316	single oocyte	FS	7847	G	A	479	3	0.0063	germline	ATP8	nonsyn	ti	protein coding	AGT	G>A	2	1	3
G133p4_Br	G129	G133	G133p4	pup	female	19	brain	CV	7847	G	A	2596	1	0.0004	somatic	ATP8	nonsyn	ti	protein coding	AGT	G>A	2	1	3
G139_Br	G126	G139	G139	mother	female	316	brain	CV	7847	G	A	3790	1	0.0003	somatic	ATP8	nonsyn	ti	protein coding	AGT	G>A	2	1	3
G140p1_Br	G126	G140	G140p1	pup	male	21	brain	CV	7856	C	A	4372	1	0.0002	somatic	ATP8	nonsyn	tv	protein coding	ACA	C>A	1	0	1
G133_Br	G129	G133	G133	mother	female	308	brain	CV	7868	C	T	1904	1	0.0005	somatic	ATP8	syn	ti	protein coding	ACT	C>T	0	1	1
G137p1_M	G126	G137	G137p1	pup	male	17	muscle	CV	7893	C	T	991	1	0.001	somatic	ATP8	nonsyn	ti	protein coding	ACA	C>T	1	0	1
G140p5_M	G126	G140	G140p5	pup	female	21	muscle	CV	7895	A	G	2724	1	0.0004	somatic	ATP8	nonsyn	ti	protein coding	AAC	A>G	1	0	1
G133_Oo_pool	G129	G133	G133	mother	female	308	oocyte pool	CV	7919	G	T	1621	2	0.0012	germline	ATP8	nonsyn	tv	protein coding	AGA	G>T	0	1	1
G131_Oo5	G129	G131	G131	mother	female	291	single oocyte	FS	7923	T	C	185	1	0.0054	germline	ATP8	nonsyn	ti	protein coding	TTA	T>C	0	1	1
G132_Oo3	G129	G132	G132	mother	female	312	single oocyte	FS	7928	T	C	260	1	0.0039	germline	ATP8	nonsyn	ti	protein coding	ATG	T>C	0	1	1
G139_Br	G126	G139	G139	mother	female	316	brain	CV	7929	G	A	4118	1	0.0002	somatic	ATP8	nonsyn	ti	protein coding	TGA	G>A	1	0	1
G140p7_Br	G126	G140	G140p7	pup	female	21	brain	CV	7935	A	G	1586	1	0.0006	somatic	ATP8	nonsyn	ti	protein coding	AAA	A>G	1	0	1
G136_Br	G126	G136	G136	mother	female	299	brain	CV	7938	T	C	2351	1	0.0004	somatic	ATP8	nonsyn	ti	protein coding	ATC	T>C	1	0	1
G139_M	G126	G139	G139	mother	female	316	muscle	CV	7945	G	T	5285	1	0.0002	somatic	ATP8	nonsyn	tv	protein coding	TGC	G>T	1	0	1
G139_M	G126	G139	G139	mother	female	316	muscle	CV	7945	G	A	5285	1	0.0002	somatic	ATP8	syn	ti	protein coding	TGC	G>A	2	0	2
G137_Oo2	G126	G137	G137	mother	female	320	single oocyte	FS	7945	G	A	784	1	0.0013	germline	ATP8	syn	ti	protein coding	TGC	G>A	2	0	2
G132p1_M	G129	G132	G132p1	pup	male	19	muscle	CV	7970	T	C	1526	1	0.0007	somatic	ATP6	nonsyn	ti	protein coding	ATA	T>C	0	1	1
G131_M	G129	G131	G131	mother	female	291	muscle	CV	7973	G	T	1492	1	0.0007	somatic	ATP6	nonsyn	tv	protein coding	GGA	G>T	0	1	1
G132p8_Oo_pool	G129	G132	G132p8	pup	female	21	oocyte pool	CV	7978	C	T	1046	1	0.001	germline	ATP6	nonsyn	ti	protein coding	CCC	C>T	0	1	1
G137p5_Br	G126	G137	G137p5	pup	female	18	brain	CV	7983	C	A	3098	1	0.0003	somatic	ATP6	nonsyn	tv	protein coding	TCG	C>A	1	0	1
G132p7_Oo_pool	G129	G132	G132p7	pup	female	21	oocyte pool	CV	7995	C	T	1361	1	0.0007	germline	ATP6	syn	ti	protein coding	TCA	C>T	0	1	1
G133p4_Oo4	G129	G133	G133p4	pup	female	19	single oocyte	FS	8005	C	A	144	1	0.0069	germline	ATP6	nonsyn	tv	protein coding	TCC	C>A	0	1	1
G137_Oo3	G126	G137	G137	mother	female	320	single oocyte	FS	8017	T	C	55	2	0.0364	germline	ATP6	nonsyn	ti	protein coding	ATT	T>C	1	0	1
G133_Br	G129	G133	G133	mother	female	308	brain	CV	8033	G	A	1820	1	0.0006	somatic	ATP6	nonsyn	ti	protein coding	CGC	CpG>CpA	0	1	1
G134p7_M	G129	G134	G134p7	pup	female	18	muscle	CV	8047	C	A	2788	1	0.0004	somatic	ATP6	nonsyn	tv	protein coding	CCG	C>A	0	1	1
G140_M	G126	G140	G140	mother	female	316	muscle	CV	8048	G	A	3815	1	0.0003	somatic	ATP6	nonsyn	ti	protein coding	CGT	CpG>CpA	1	0	1
G137p3_M	G126	G137	G137p3	pup	female	17	muscle	CV	8084	T	C	1190	1	0.0008	somatic	ATP6	nonsyn	ti	protein coding	ATT	T>C	1	0	1
G140p6_Br	G126	G140	G140p6	pup	female	21	brain	CV	8086	A	G	4971	1	0.0002	somatic	ATP6	nonsyn	ti	protein coding	TAT	A>G	1	0	1
G137p5_M	G126	G137	G137p5	pup	female	18	muscle	CV	8092	C	A	3252	1	0.0003	somatic	ATP6	nonsyn	tv	protein coding	ACA	C>A	1	0	1
G137p5_M	G126	G137	G137p5	pup	female	18	muscle	CV	8092	C	T	3252	1	0.0003	somatic	ATP6	nonsyn	ti	protein coding	ACA	C>T	1	0	1
G140_Br	G126	G140	G140	mother	female	316	brain	CV	8119	G	A	3799	1	0.0003	somatic	ATP6	nonsyn	ti	protein coding	AGG	G>A	1	0	1
G133p4_Br	G129	G133	G133p4	pup	female	19	brain	CV	8121	A	G	2985	1	0.0003	somatic	ATP6	syn	ti	protein coding	GAC	A>G	0	1	1
G131_Oo6	G129	G131	G131	mother	female	291	single oocyte	FS	8127	A	G	96	1	0.0104	germline	ATP6	syn	ti	protein coding	CAT	A>G	0	1	1
G133_Oo1	G129	G133	G133	mother	female	308	single oocyte	FS	8131	A	G	911	10	0.011	germline	ATP6	nonsyn	ti	protein coding	AAC	A>G	0	1	1
G136_Oo_pool	G126	G136	G136	mother	female	299	oocyte pool	CV	8145	T	C	2434	1	0.0004	germline	ATP6	syn	ti	protein coding	TTT	T>C	1	0	1
G139p1_M	G126	G139	G139p1	pup	female	18	muscle	CV	8165	G	A	2084	1	0.0005	somatic	ATP6	nonsyn	ti	protein coding	GGA	G>A	1	0	1
G140p1_Br	G126	G140	G140p1	pup	male	21	brain	CV	8168	C	A	4729	1	0.0002	somatic	ATP6	nonsyn	tv	protein coding	TCA	C>A	1	0	1
G133p4_Br	G129	G133	G133p4	pup	female	19	brain	CV	8194	C	A	2916	1	0.0003	somatic	ATP6	nonsyn	tv	protein coding	ACA	C>A	0	1	1
G132p8_M	G129	G132	G132p8	pup	female	21	muscle	CV	8203	A	T	1835	1	0.0005	somatic	ATP6	nonsyn	tv	protein coding	TAC	A>T	0	1	1
G132p3_M	G129	G132	G132p3	pup	female	19	muscle	CV	8221	T	C	2152	2	0.0009	somatic	ATP6	nonsyn	ti	protein coding	ATC	T>C	1	1	2
G136_Br	G126	G136	G136	mother	female	299	brain	CV	8221	T	A	2542	1	0.0004	somatic	ATP6	nonsyn	tv	protein coding	ATC	T>A	1	0	1
G140p7_Br	G126	G140	G140p7	pup	female	21	brain	CV	8221	T	C	1590	1	0.0006	somatic	ATP6	nonsyn	ti	protein coding	ATC	T>C	1	1	2
G133p2_M	G129	G133	G133p2	pup	male	19	muscle	CV	8234	G	A	982	1	0.001	somatic	ATP6	nonsyn	ti	protein coding	AGT	G>A	0	1	1
G140p7_Oo2	G126	G140	G140p7	pup	female	21	single oocyte	FS	8256	T	C	461	1	0.0022	germline	ATP6	syn	ti	protein coding	CTG	T>C	1	0	1
G133p4_Br	G129	G133	G133p4	pup	female	19	brain	CV	8273	G	A	2960	1	0.0003	somatic	ATP6	nonsyn	ti	protein coding	GGC	G>A	0	1	1
G137_M	G126	G137	G137	mother	female	320	muscle	CV	8279	G	A	3041	1	0.0003	somatic	ATP6	nonsyn	ti	protein coding	CGA	CpG>CpA	1	0	1
G132p1_M	G129	G132	G132p1	pup	male	19	muscle	CV	8298	A	G	1609	1	0.0006	somatic	ATP6	syn	ti	protein coding	CAC	A>G	0	1	1
G133p2_Br	G129	G133	G133p2	pup	male	19	brain	CV	8304	C	A	2651	1	0.0004	somatic	ATP6	syn	tv	protein coding	CCC	C>A	0	1	1
G140p7_Oo_pool	G126	G140	G140p7	pup	female	21	oocyte pool	CV	8333	C	A	1321	1	0.0008	germline	ATP6	nonsyn	tv	protein coding	TCA	C>A	1	0	1
G133_Oo1	G129	G133	G133	mother	female	308	single oocyte	FS	8375	T	C	996	1	0.001	germline	ATP6	nonsyn	ti	protein coding	TTT	T>C	0	1	1
G140p6_Oo_pool	G126	G140	G140p6	pup	female	21	oocyte pool	CV	8383	C	A	1120	1	0.0009	germline	ATP6	nonsyn	tv	protein coding	ACC	C>A	1	0	1
G136_M	G126	G136	G136	mother	female	299	muscle	CV	8389	G	A	924	1	0.0011	somatic	ATP6	nonsyn	ti	protein coding	GGC	G>A	1	0	1
G139_Br	G126	G139	G139	mother	female	316	brain	CV	8390	C	T	4300	1	0.0002	somatic	ATP6	nonsyn	ti	protein coding	GCA	C>T	1	0	1
G140p6_Br	G126	G140	G140p6	pup	female	21	brain	CV	8394	A	G	5266	1	0.0002	somatic	ATP6	syn	ti	protein coding	TAG	A>G	1	0	1
G139_M	G126	G139	G139	mother	female	316	muscle	CV	8395	G	A	5467	1	0.0002	somatic	ATP6	nonsyn	ti	protein coding	AGC	G>A	1	0	1
G133p3_Oo2	G129	G133	G133p3	pup	female	19	single oocyte	FS	8402	G	A	36	1	0.0278	germline	ATP6	nonsyn	ti	protein coding	CGG	CpG>CpA	0	1	1
G139p2_M	G126	G139	G139p2	pup	female	18	muscle	CV	8420	C	T	1460	1	0.0007	somatic	ATP6	nonsyn	ti	protein coding	ACT	C>T	1	0	1
G136_M	G126	G136	G136	mother	female	299	muscle	CV	8423	C	A	901	1	0.0011	somatic	ATP6	nonsyn	tv	protein coding	GCA	C>A	1	0	1
G140p6_Oo2	G126	G140	G140p6	pup	female	21	single oocyte	FS	8425	G	A	297	22	0.0741	germline	ATP6	nonsyn	ti	protein coding	AGG	G>A	2	0	2
G137_M	G126	G137	G137	mother	female	320	muscle	CV	8425	G	A	3282	1	0.0003	somatic	ATP6	nonsyn	ti	protein coding	AGG	G>A	2	0	2
G132p2_Br	G129	G132	G132p2	pup	male	19	brain	CV	8442	C	G	2560	1	0.0004	somatic	ATP6	nonsyn	tv	protein coding	ACC	C>G	0	1	1
G140p5_Br	G126	G140	G140p5	pup	female	21	brain	CV	8449	G	A	2638	1	0.0004	somatic	ATP6	nonsyn	ti	protein coding	CGG	CpG>CpA	1	0	1
G132p2_M	G129	G132	G132p2	pup	male	19	muscle	CV	8450	G	A	3506	1	0.0003	somatic	ATP6	nonsyn	ti	protein coding	GGA	G>A	1	1	2
G136_M	G126	G136	G136	mother	female	299	muscle	CV	8450	G	A	861	1	0.0012	somatic	ATP6	nonsyn	ti	protein coding	GGA	G>A	1	1	2
G132_M	G129	G132	G132	mother	female	312	muscle	CV	8455	G	A	3261	1	0.0003	somatic	ATP6	nonsyn	ti	protein coding	AGC	G>A	0	2	2
G132_Oo3	G129	G132	G132	mother	female	312	single oocyte	FS	8455	G	A	292	1	0.0034	germline	ATP6	nonsyn	ti	protein coding	AGC	G>A	0	2	2
G139p2_Br	G126	G139	G139p2	pup	female	18	brain	CV	8456	C	A	1281	1	0.0008	somatic	ATP6	nonsyn	tv	protein coding	GCT	C>A	1	0	1
G140p7_Br	G126	G140	G140p7	pup	female	21	brain	CV	8483	C	A	1515	1	0.0007	somatic	ATP6	nonsyn	tv	protein coding	CCA	C>A	1	0	1
G133_M	G129	G133	G133	mother	female	308	muscle	CV	8486	C	A	3625	1	0.0003	somatic	ATP6	nonsyn	tv	protein coding	CCA	C>A	0	1	1
G139_Br	G126	G139	G139	mother	female	316	brain	CV	8488	A	T	4377	1	0.0002	somatic	ATP6	nonsyn	tv	protein coding	AAC	A>T	1	0	1
G137p5_Br	G126	G137	G137p5	pup	female	18	brain	CV	8498	T	A	3373	1	0.0003	somatic	ATP6	nonsyn	tv	protein coding	ATT	T>A	1	0	1
G137p2_Br	G126	G137	G137p2	pup	female	17	brain	CV	8518	C	A	4033	1	0.0003	somatic	ATP6	nonsyn	tv	protein coding	TCT	C>A	1	1	2
G134p7_M	G129	G134	G134p7	pup	female	18	muscle	CV	8518	C	A	2779	1	0.0004	somatic	ATP6	nonsyn	tv	protein coding	TCT	C>A	1	1	2
G132p7_Br	G129	G132	G132p7	pup	female	21	brain	CV	8533	G	T	5873	1	0.0002	somatic	ATP6	nonsyn	tv	protein coding	AGA	G>T	1	1	2
G140p1_M	G126	G140	G140p1	pup	male	21	muscle	CV	8533	G	T	5375	1	0.0002	somatic	ATP6	nonsyn	tv	protein coding	AGA	G>T	1	1	2
G132_Oo3	G129	G132	G132	mother	female	312	single oocyte	FS	8536	T	C	289	1	0.0035	germline	ATP6	nonsyn	ti	protein coding	ATT	T>C	0	1	1
G132p1_Br	G129	G132	G132p1	pup	male	19	brain	CV	8563	G	A	1677	1	0.0006	somatic	ATP6	nonsyn	ti	protein coding	CGT	CpG>CpA	0	1	1
G133p4_M	G129	G133	G133p4	pup	female	19	muscle	CV	8564	T	C	4668	1	0.0002	somatic	ATP6	nonsyn	ti	protein coding	GTA	T>C	0	1	1
G134p7_Br	G129	G134	G134p7	pup	female	18	brain	CV	8568	C	T	1086	1	0.0009	somatic	ATP6	syn	ti	protein coding	TCA	C>T	0	1	1
G133_M	G129	G133	G133	mother	female	308	muscle	CV	8578	G	A	3614	1	0.0003	somatic	ATP6	nonsyn	ti	protein coding	AGT	G>A	0	1	1
G133_Br	G129	G133	G133	mother	female	308	brain	CV	8583	C	T	1832	1	0.0006	somatic	ATP6	syn	ti	protein coding	GCC	C>T	0	1	1
G133_M	G129	G133	G133	mother	female	308	muscle	CV	8631	C	A	3513	1	0.0003	somatic	COX3	nonsyn	tv	protein coding	TCA	C>A	0	1	1
G140p1_Br	G126	G140	G140p1	pup	male	21	brain	CV	8632	A	C	5148	1	0.0002	somatic	COX3	nonsyn	tv	protein coding	CAC	A>C	1	0	1
G132_Br	G129	G132	G132	mother	female	312	brain	CV	8642	T	C	810	1	0.0012	somatic	COX3	syn	ti	protein coding	ATC	T>C	0	1	1
G136_Br	G126	G136	G136	mother	female	299	brain	CV	8647	G	A	2510	1	0.0004	somatic	COX3	nonsyn	ti	protein coding	AGT	G>A	1	0	1
G133p2_Br	G129	G133	G133p2	pup	male	19	brain	CV	8663	T	C	2935	1	0.0003	somatic	COX3	syn	ti	protein coding	CTG	T>C	0	1	1
G132p7_Br	G129	G132	G132p7	pup	female	21	brain	CV	8674	C	A	5935	1	0.0002	somatic	COX3	nonsyn	tv	protein coding	TCA	C>A	0	1	1
G137p5_M	G126	G137	G137p5	pup	female	18	muscle	CV	8676	G	T	3604	1	0.0003	somatic	COX3	nonsyn	tv	protein coding	AGC	G>T	1	0	1
G137p2_Br	G126	G137	G137p2	pup	female	17	brain	CV	8676	G	A	4035	1	0.0003	somatic	COX3	nonsyn	ti	protein coding	AGC	G>A	3	0	3
G139_Br	G126	G139	G139	mother	female	316	brain	CV	8676	G	A	4537	1	0.0002	somatic	COX3	nonsyn	ti	protein coding	AGC	G>A	3	0	3
G140p7_Oo3	G126	G140	G140p7	pup	female	21	single oocyte	FS	8676	G	A	455	1	0.0022	germline	COX3	nonsyn	ti	protein coding	AGC	G>A	3	0	3
G133_M	G129	G133	G133	mother	female	308	muscle	CV	8685	C	A	3482	1	0.0003	somatic	COX3	nonsyn	tv	protein coding	TCT	C>A	0	1	1
G132p9_Oo_pool	G129	G132	G132p9	pup	female	21	oocyte pool	CV	8695	G	T	3354	1	0.0003	germline	COX3	nonsyn	tv	protein coding	GGT	G>T	0	1	1
G134_M	G129	G134	G134	mother	female	295	muscle	CV	8700	G	A	826	1	0.0012	somatic	COX3	nonsyn	ti	protein coding	AGT	G>A	0	1	1
G133p3_Br	G129	G133	G133p3	pup	female	19	brain	CV	8703	A	G	4839	1	0.0002	somatic	COX3	nonsyn	ti	protein coding	AAT	A>G	0	1	1
G139_Br	G126	G139	G139	mother	female	316	brain	CV	8711	T	C	4456	1	0.0002	somatic	COX3	syn	ti	protein coding	TTC	T>C	1	0	1
G131p2_M	G129	G131	G131p2	pup	male	18	muscle	CV	8722	C	A	2467	1	0.0004	somatic	COX3	nonsyn	tv	protein coding	TCA	C>A	0	1	1
G131_Br	G129	G131	G131	mother	female	291	brain	CV	8727	A	G	2337	1	0.0004	somatic	COX3	nonsyn	ti	protein coding	TAC	A>G	0	1	1
G132p1_Br	G129	G132	G132p1	pup	male	19	brain	CV	8730	C	G	1588	1	0.0006	somatic	COX3	nonsyn	tv	protein coding	ACT	C>G	0	1	1
G139_Br	G126	G139	G139	mother	female	316	brain	CV	8743	G	A	4432	1	0.0002	somatic	COX3	nonsyn	ti	protein coding	GGC	G>A	1	0	1
G137_M	G126	G137	G137	mother	female	320	muscle	CV	8776	G	A	3385	1	0.0003	somatic	COX3	nonsyn	ti	protein coding	TGA	G>A	1	0	1
G140_M	G126	G140	G140	mother	female	316	muscle	CV	8779	G	A	4090	1	0.0002	somatic	COX3	nonsyn	ti	protein coding	TGA	G>A	1	0	1
G131_Br	G129	G131	G131	mother	female	291	brain	CV	8782	G	A	2344	1	0.0004	somatic	COX3	nonsyn	ti	protein coding	CGA	CpG>CpA	0	1	1
G137p5_Br	G126	G137	G137p5	pup	female	18	brain	CV	8782	G	T	3462	1	0.0003	somatic	COX3	nonsyn	tv	protein coding	CGA	G>T	1	0	1
G139_M	G126	G139	G139	mother	female	316	muscle	CV	8784	G	A	5864	1	0.0002	somatic	COX3	nonsyn	ti	protein coding	AGA	G>A	1	0	1
G139_M	G126	G139	G139	mother	female	316	muscle	CV	8787	G	A	5843	1	0.0002	somatic	COX3	nonsyn	ti	protein coding	CGT	CpG>CpA	1	1	2
G132_Oo3	G129	G132	G132	mother	female	312	single oocyte	FS	8787	G	A	371	1	0.0027	germline	COX3	nonsyn	ti	protein coding	CGT	CpG>CpA	1	1	2
G131_Br	G129	G131	G131	mother	female	291	brain	CV	8791	T	C	2323	1	0.0004	somatic	COX3	nonsyn	ti	protein coding	ATT	T>C	0	1	1
G140p6_M	G126	G140	G140p6	pup	female	21	muscle	CV	8799	G	A	2404	1	0.0004	somatic	COX3	nonsyn	ti	protein coding	AGG	G>A	1	0	1
G136_Br	G126	G136	G136	mother	female	299	brain	CV	8802	A	T	2649	1	0.0004	somatic	COX3	nonsyn	tv	protein coding	AAC	A>T	1	0	1
G133_Br	G129	G133	G133	mother	female	308	brain	CV	8812	G	A	2086	1	0.0005	somatic	COX3	nonsyn	ti	protein coding	GGC	G>A	0	2	2
G133p3_Br	G129	G133	G133p3	pup	female	19	brain	CV	8812	G	A	4866	1	0.0002	somatic	COX3	nonsyn	ti	protein coding	GGC	G>A	0	2	2
G134_Oo1	G129	G134	G134	mother	female	295	single oocyte	CV	8819	C	A	952	1	0.0011	germline	COX3	nonsyn	tv	protein coding	ACA	C>A	0	1	1
G132_M	G129	G132	G132	mother	female	312	muscle	CV	8838	G	A	3015	1	0.0003	somatic	COX3	nonsyn	ti	protein coding	AGG	G>A	0	1	1
G132_Br	G129	G132	G132	mother	female	312	brain	CV	8847	T	C	877	1	0.0011	somatic	COX3	nonsyn	ti	protein coding	ATA	T>C	0	1	1
G137p2_Br	G126	G137	G137p2	pup	female	17	brain	CV	8866	T	C	3948	2	0.0005	somatic	COX3	nonsyn	ti	protein coding	ATC	T>C	1	0	1
G139_M	G126	G139	G139	mother	female	316	muscle	CV	8868	G	A	5630	1	0.0002	somatic	COX3	nonsyn	ti	protein coding	CGT	CpG>CpA	1	0	1
G132p1_Br	G129	G132	G132p1	pup	male	19	brain	CV	8876	A	G	1508	2	0.0013	somatic	COX3	syn	ti	protein coding	AAG	A>G	0	1	1
G132_M	G129	G132	G132	mother	female	312	muscle	CV	8904	G	A	2727	1	0.0004	somatic	COX3	nonsyn	ti	protein coding	AGC	G>A	0	1	1
G133_Oo_pool	G129	G133	G133	mother	female	308	oocyte pool	CV	8905	C	A	1960	1	0.0005	germline	COX3	nonsyn	tv	protein coding	GCG	C>A	0	1	1
G137p5_Br	G126	G137	G137p5	pup	female	18	brain	CV	8906	G	A	3092	1	0.0003	somatic	COX3	syn	ti	protein coding	CGT	CpG>CpA	1	0	1
G139_Br	G126	G139	G139	mother	female	316	brain	CV	8920	G	A	4117	1	0.0002	somatic	COX3	nonsyn	ti	protein coding	AGC	G>A	1	1	2
G133_M	G129	G133	G133	mother	female	308	muscle	CV	8920	G	A	3200	1	0.0003	somatic	COX3	nonsyn	ti	protein coding	AGC	G>A	1	1	2
G132p2_M	G129	G132	G132p2	pup	male	19	muscle	CV	8921	C	G	2998	1	0.0003	somatic	COX3	nonsyn	tv	protein coding	GCC	C>G	0	1	1
G140_Oo2	G126	G140	G140	mother	female	316	single oocyte	FS	8921	C	T	1261	1	0.0008	germline	COX3	syn	ti	protein coding	GCC	C>T	1	0	1
G133_Br	G129	G133	G133	mother	female	308	brain	CV	8946	G	A	2135	1	0.0005	somatic	COX3	nonsyn	ti	protein coding	AGG	G>A	0	1	1
G132p1_M	G129	G132	G132p1	pup	male	19	muscle	CV	8953	G	A	1466	1	0.0007	somatic	COX3	nonsyn	ti	protein coding	TGA	G>A	0	1	1
G132_Oo3	G129	G132	G132	mother	female	312	single oocyte	FS	8958	C	A	351	1	0.0029	germline	COX3	nonsyn	tv	protein coding	TCC	C>A	0	1	1
G131_M	G129	G131	G131	mother	female	291	muscle	CV	8964	G	A	1565	1	0.0006	somatic	COX3	nonsyn	ti	protein coding	AGG	G>A	0	1	1
G131p3_Br	G129	G131	G131p3	pup	female	18	brain	CV	8988	G	T	2787	1	0.0004	somatic	COX3	nonsyn	tv	protein coding	AGA	G>T	0	1	1
G137_M	G126	G137	G137	mother	female	320	muscle	CV	8993	C	T	3009	1	0.0003	somatic	COX3	syn	ti	protein coding	TCC	C>T	1	0	1
G132p3_M	G129	G132	G132p3	pup	female	19	muscle	CV	8994	C	A	2052	1	0.0005	somatic	COX3	nonsyn	tv	protein coding	CCC	C>A	0	1	1
G132_Br	G129	G132	G132	mother	female	312	brain	CV	9021	G	A	823	1	0.0012	somatic	COX3	nonsyn	ti	protein coding	AGC	G>A	2	1	3
G140_Br	G126	G140	G140	mother	female	316	brain	CV	9021	G	A	3832	1	0.0003	somatic	COX3	nonsyn	ti	protein coding	AGC	G>A	2	1	3
G136_Oo6	G126	G136	G136	mother	female	299	single oocyte	FS	9021	G	A	933	1	0.0011	germline	COX3	nonsyn	ti	protein coding	AGC	G>A	2	1	3
G132p6_M	G129	G132	G132p6	pup	female	21	muscle	CV	9045	G	A	1513	1	0.0007	somatic	COX3	nonsyn	ti	protein coding	AGC	G>A	0	1	1
G139_M	G126	G139	G139	mother	female	316	muscle	CV	9046	C	A	5360	1	0.0002	somatic	COX3	nonsyn	tv	protein coding	GCT	C>A	1	0	1
G131_Br	G129	G131	G131	mother	female	291	brain	CV	9057	C	T	2227	1	0.0005	somatic	COX3	nonsyn	ti	protein coding	CCT	C>T	0	1	1
G137_Oo2	G126	G137	G137	mother	female	320	single oocyte	FS	9063	G	A	873	1	0.0012	germline	COX3	nonsyn	ti	protein coding	AGA	G>A	1	0	1
G134_Br	G129	G134	G134	mother	female	295	brain	CV	9064	A	G	160	1	0.0063	somatic	COX3	nonsyn	ti	protein coding	GAA	A>G	0	1	1
G133p4_M	G129	G133	G133p4	pup	female	19	muscle	CV	9073	G	A	4097	1	0.0002	somatic	COX3	nonsyn	ti	protein coding	CGA	CpG>CpA	0	1	1
G133p4_M	G129	G133	G133p4	pup	female	19	muscle	CV	9073	G	C	4097	1	0.0002	somatic	COX3	nonsyn	tv	protein coding	CGA	G>C	0	1	1
G134_Oo1	G129	G134	G134	mother	female	295	single oocyte	CV	9085	A	G	923	1	0.0011	germline	COX3	nonsyn	ti	protein coding	AAT	A>G	0	1	1
G133_M	G129	G133	G133	mother	female	308	muscle	CV	9086	T	G	3187	1	0.0003	somatic	COX3	nonsyn	tv	protein coding	ATC	T>G	0	1	1
G139_M	G126	G139	G139	mother	female	316	muscle	CV	9090	G	A	5324	1	0.0002	somatic	COX3	nonsyn	ti	protein coding	AGC	G>A	1	0	1
G137p2_Br	G126	G137	G137p2	pup	female	17	brain	CV	9103	C	G	3767	1	0.0003	somatic	COX3	nonsyn	tv	protein coding	ACC	C>G	1	0	1
G137p4_Br	G126	G137	G137p4	pup	male	18	brain	CV	9115	G	A	2922	1	0.0003	somatic	COX3	nonsyn	ti	protein coding	GGA	G>A	1	0	1
G132p5_Oo_pool	G129	G132	G132p5	pup	female	21	oocyte pool	CV	9131	C	A	2161	3	0.0014	germline	COX3	nonsyn	tv	protein coding	TCC	C>A	0	2	2
G132p5_M	G129	G132	G132p5	pup	female	21	muscle	CV	9131	C	A	1946	1	0.0005	somatic	COX3	nonsyn	tv	protein coding	TCC	C>A	0	2	2
G137p3_Oo5	G126	G137	G137p3	pup	female	17	single oocyte	FS	9132	C	A	609	1	0.0016	germline	COX3	nonsyn	tv	protein coding	CCT	C>A	1	0	1
G136_M	G126	G136	G136	mother	female	299	muscle	CV	9142	C	T	904	1	0.0011	somatic	COX3	nonsyn	ti	protein coding	TCA	C>T	1	0	1
G140p7_M	G126	G140	G140p7	pup	female	21	muscle	CV	9144	G	A	2573	1	0.0004	somatic	COX3	nonsyn	ti	protein coding	AGA	G>A	1	0	1
G137p5_M	G126	G137	G137p5	pup	female	18	muscle	CV	9144	G	T	3378	1	0.0003	somatic	COX3	nonsyn	tv	protein coding	AGA	G>T	1	0	1
G137_Br	G126	G137	G137	mother	female	320	brain	CV	9153	G	A	1665	1	0.0006	somatic	COX3	nonsyn	ti	protein coding	TGA	G>A	1	1	2
G134p7_M	G129	G134	G134p7	pup	female	18	muscle	CV	9153	G	A	3000	1	0.0003	somatic	COX3	nonsyn	ti	protein coding	TGA	G>A	1	1	2
G140_Br	G126	G140	G140	mother	female	316	brain	CV	9174	G	A	3873	1	0.0003	somatic	COX3	nonsyn	ti	protein coding	AGA	G>A	1	0	1
G140_M	G126	G140	G140	mother	female	316	muscle	CV	9178	G	A	3868	2	0.0005	somatic	COX3	nonsyn	ti	protein coding	GGT	G>A	1	0	1
G133_M	G129	G133	G133	mother	female	308	muscle	CV	9186	G	A	3159	1	0.0003	somatic	COX3	nonsyn	ti	protein coding	TGG	G>A	0	1	1
G132_Oo_pool	G129	G132	G132	mother	female	312	oocyte pool	CV	9187	G	A	67	1	0.0149	germline	COX3	nonsyn	ti	protein coding	GGT	G>A	0	1	1
G133p1_M	G129	G133	G133p1	pup	male	19	muscle	CV	9188	T	C	985	1	0.001	somatic	COX3	syn	ti	protein coding	GTT	T>C	0	1	1
G140_M	G126	G140	G140	mother	female	316	muscle	CV	9190	C	A	3830	1	0.0003	somatic	COX3	nonsyn	tv	protein coding	TCT	C>A	1	0	1
G131p1_M	G129	G131	G131p1	pup	male	18	muscle	CV	9203	G	C	1572	1	0.0006	somatic	COX3	nonsyn	tv	protein coding	TGG	G>C	0	1	1
G133_Br	G129	G133	G133	mother	female	308	brain	CV	9209	T	C	2134	1	0.0005	somatic	COX3	syn	ti	protein coding	CTG	T>C	0	1	1
G133_Br	G129	G133	G133	mother	female	308	brain	CV	9220	G	A	2124	1	0.0005	somatic	COX3	nonsyn	ti	protein coding	GGA	G>A	0	2	2
G133p2_M	G129	G133	G133p2	pup	male	19	muscle	CV	9220	G	A	782	1	0.0013	somatic	COX3	nonsyn	ti	protein coding	GGA	G>A	0	2	2
G133_M	G129	G133	G133	mother	female	308	muscle	CV	9237	G	T	2992	1	0.0003	somatic	COX3	nonsyn	tv	protein coding	TGG	G>T	0	1	1
G139p1_Br	G126	G139	G139p1	pup	female	18	brain	CV	9240	T	A	1310	1	0.0008	somatic	COX3	nonsyn	tv	protein coding	ATC	T>A	1	0	1
G140p6_Br	G126	G140	G140p6	pup	female	21	brain	CV	9253	T	C	5025	1	0.0002	somatic	COX3	nonsyn	ti	protein coding	ATT	T>C	1	0	1
G140p5_Br	G126	G140	G140p5	pup	female	21	brain	CV	9259	G	A	2514	1	0.0004	somatic	COX3	nonsyn	ti	protein coding	TGC	G>A	1	0	1
G137p3_Br	G126	G137	G137p3	pup	female	17	brain	CV	9268	G	A	1055	1	0.001	somatic	COX3	nonsyn	ti	protein coding	CGA	CpG>CpA	1	0	1
G139_M	G126	G139	G139	mother	female	316	muscle	CV	9280	T	C	4969	1	0.0002	somatic	COX3	nonsyn	ti	protein coding	TTT	T>C	1	0	1
G140p5_M	G126	G140	G140p5	pup	female	21	muscle	CV	9286	T	C	2857	1	0.0004	somatic	COX3	nonsyn	ti	protein coding	TTC	T>C	1	0	1
G133p3_Br	G129	G133	G133p3	pup	female	19	brain	CV	9297	C	T	4633	1	0.0002	somatic	COX3	nonsyn	ti	protein coding	ACA	C>T	0	1	1
G133p4_M	G129	G133	G133p4	pup	female	19	muscle	CV	9321	G	A	4140	1	0.0002	somatic	COX3	nonsyn	ti	protein coding	AGC	G>A	0	1	1
G131p3_Br	G129	G131	G131p3	pup	female	18	brain	CV	9345	G	A	2685	1	0.0004	somatic	COX3	nonsyn	ti	protein coding	CGT	CpG>CpA	0	2	2
G134p7_M	G129	G134	G134p7	pup	female	18	muscle	CV	9345	G	A	2698	1	0.0004	somatic	COX3	nonsyn	ti	protein coding	CGT	CpG>CpA	0	2	2
G132p7_Br	G129	G132	G132p7	pup	female	21	brain	CV	9346	T	C	5135	5	0.001	somatic	COX3	nonsyn	ti	protein coding	GTA	T>C	0	1	1
G139p1_M	G126	G139	G139p1	pup	female	18	muscle	CV	9348	G	A	1945	1	0.0005	somatic	COX3	nonsyn	ti	protein coding	AGT	G>A	1	0	1
G131p1_Br	G129	G131	G131p1	pup	male	18	brain	CV	9348	A	G	850	1	0.0012	somatic	COX3	nonsyn	ti	protein coding	AGT	A>G	0	2	2
G133p4_Br	G129	G133	G133p4	pup	female	19	brain	CV	9348	A	G	2668	1	0.0004	somatic	COX3	nonsyn	ti	protein coding	AGT	A>G	0	2	2
G132p8_Oo_pool	G129	G132	G132p8	pup	female	21	oocyte pool	CV	9354	C	A	1059	1	0.0009	germline	COX3	nonsyn	tv	protein coding	ACT	C>A	0	1	1
G139_Oo2	G126	G139	G139	mother	female	316	single oocyte	FS	9354	C	T	533	1	0.0019	germline	COX3	nonsyn	ti	protein coding	ACT	C>T	1	0	1
G140_M	G126	G140	G140	mother	female	316	muscle	CV	9356	T	C	3541	1	0.0003	somatic	COX3	syn	ti	protein coding	TTT	T>C	1	0	1
G139_Br	G126	G139	G139	mother	female	316	brain	CV	9379	G	A	3903	1	0.0003	somatic	COX3	nonsyn	ti	protein coding	TGA	G>A	1	0	1
G132_Br	G129	G132	G132	mother	female	312	brain	CV	9382	G	T	763	1	0.0013	somatic	COX3	nonsyn	tv	protein coding	TGA	G>T	0	1	1
G133p4_M	G129	G133	G133p4	pup	female	19	muscle	CV	9390	T	C	4100	4	0.001	somatic	COX3	nonsyn	ti	protein coding	TTA	T>C	0	1	1
G137p3_Br	G126	G137	G137p3	pup	female	17	brain	CV	9409	A	G	997	1	0.001	somatic	TrnG	-	ti	RNA	AAT	A>G	1	0	1
G131p3_Br	G129	G131	G131p3	pup	female	18	brain	CV	9449	G	A	2678	1	0.0004	somatic	TrnG	-	ti	RNA	AGA	G>A	0	1	1
G136_Br	G126	G136	G136	mother	female	299	brain	CV	9461	C	T	2158	1	0.0005	somatic	ND3	syn	ti	protein coding	TTA	C>T	1	0	1
G140p1_Br	G126	G140	G140p1	pup	male	21	brain	CV	9470	C	T	4350	1	0.0002	somatic	ND3	syn	ti	protein coding	ACA	C>T	1	0	1
G132p4_Br	G129	G132	G132p4	pup	female	19	brain	CV	9479	C	A	1703	1	0.0006	somatic	ND3	nonsyn	tv	protein coding	TCT	C>A	0	1	1
G132p2_Br	G129	G132	G132p2	pup	male	19	brain	CV	9501	C	A	2171	1	0.0005	somatic	ND3	nonsyn	tv	protein coding	CCT	C>A	0	1	1
G140_Br	G126	G140	G140	mother	female	316	brain	CV	9522	T	C	3085	1	0.0003	somatic	ND3	nonsyn	ti	protein coding	ATT	T>C	1	0	1
G139p1_M	G126	G139	G139p1	pup	female	18	muscle	CV	9524	C	A	1844	1	0.0005	somatic	ND3	nonsyn	tv	protein coding	TCT	C>A	1	0	1
G134_Oo1	G129	G134	G134	mother	female	295	single oocyte	CV	9526	G	A	772	1	0.0013	germline	ND3	nonsyn	ti	protein coding	TGA	G>A	0	1	1
G133_M	G129	G133	G133	mother	female	308	muscle	CV	9529	T	C	2692	1	0.0004	somatic	ND3	nonsyn	ti	protein coding	CTC	T>C	0	1	1
G137_Oo4	G126	G137	G137	mother	female	320	single oocyte	FS	9534	C	A	1399	1	0.0007	germline	ND3	nonsyn	tv	protein coding	CCA	C>A	1	0	1
G133_Br	G129	G133	G133	mother	female	308	brain	CV	9552	G	A	1737	1	0.0006	somatic	ND3	nonsyn	ti	protein coding	AGA	G>A	0	1	1
G131_Oo6	G129	G131	G131	mother	female	291	single oocyte	FS	9575	C	T	86	1	0.0116	germline	ND3	syn	ti	protein coding	GCG	CpG>TpG	0	1	1
G133p3_Br	G129	G133	G133p3	pup	female	19	brain	CV	9576	G	A	4152	1	0.0002	somatic	ND3	nonsyn	ti	protein coding	CGG	CpG>CpA	0	1	1
G134p7_M	G129	G134	G134p7	pup	female	18	muscle	CV	9581	C	T	2509	1	0.0004	somatic	ND3	syn	ti	protein coding	TCG	CpG>TpG	0	1	1
G140p6_M	G126	G140	G140p6	pup	female	21	muscle	CV	9597	G	A	1993	2	0.001	somatic	ND3	nonsyn	ti	protein coding	TGC	G>A	1	0	1
G131p2_M	G129	G131	G131p2	pup	male	18	muscle	CV	9609	T	G	2327	1	0.0004	somatic	ND3	nonsyn	tv	protein coding	ATT	T>G	0	1	1
G139_M	G126	G139	G139	mother	female	316	muscle	CV	9612	T	C	4528	1	0.0002	somatic	ND3	nonsyn	ti	protein coding	CTC	T>C	1	0	1
G140p1_M	G126	G140	G140p1	pup	male	21	muscle	CV	9613	C	T	4355	1	0.0002	somatic	ND3	nonsyn	ti	protein coding	TCA	C>T	1	0	1
G140_M	G126	G140	G140	mother	female	316	muscle	CV	9629	G	A	3339	1	0.0003	somatic	ND3	syn	ti	protein coding	TGG	G>A	1	0	1
G134_M	G129	G134	G134	mother	female	295	muscle	CV	9634	C	A	741	1	0.0014	somatic	ND3	nonsyn	tv	protein coding	GCA	C>A	0	1	1
G132_M	G129	G132	G132	mother	female	312	muscle	CV	9654	G	A	2697	1	0.0004	somatic	ND3	nonsyn	ti	protein coding	TGA	G>A	0	1	1
G137p1_Br	G126	G137	G137p1	pup	male	17	brain	CV	9660	G	T	2833	1	0.0004	somatic	ND3	nonsyn	tv	protein coding	AGA	G>T	1	0	1
G140p5_M	G126	G140	G140p5	pup	female	21	muscle	CV	9669	C	A	2573	1	0.0004	somatic	ND3	nonsyn	tv	protein coding	TCT	C>A	1	0	1
G137p2_M	G126	G137	G137p2	pup	female	17	muscle	CV	9672	C	G	2002	1	0.0005	somatic	ND3	nonsyn	tv	protein coding	TCT	C>G	1	0	1
G139_M	G126	G139	G139	mother	female	316	muscle	CV	9690	G	A	4263	1	0.0002	somatic	ND3	nonsyn	ti	protein coding	AGC	G>A	1	0	1
G137_Br	G126	G137	G137	mother	female	320	brain	CV	9729	G	A	1414	1	0.0007	somatic	ND3	nonsyn	ti	protein coding	AGC	G>A	1	0	1
G132p8_M	G129	G132	G132p8	pup	female	21	muscle	CV	9733	T	C	1672	1	0.0006	somatic	ND3	nonsyn	ti	protein coding	TTT	T>C	0	1	1
G133p3_M	G129	G133	G133p3	pup	female	19	muscle	CV	9733	T	G	4065	1	0.0003	somatic	ND3	nonsyn	tv	protein coding	TTT	T>G	0	1	1
G133p4_M	G129	G133	G133p4	pup	female	19	muscle	CV	9735	A	C	4251	1	0.0002	somatic	ND3	nonsyn	tv	protein coding	TAT	A>C	0	1	1
G139p2_M	G126	G139	G139p2	pup	female	18	muscle	CV	9743	C	A	1288	1	0.0008	somatic	ND3	syn	tv	protein coding	TCA	C>A	1	0	1
G137_M	G126	G137	G137	mother	female	320	muscle	CV	9760	G	A	2614	1	0.0004	somatic	ND3	nonsyn	ti	protein coding	GGC	G>A	1	0	1
G132p7_Oo_pool	G129	G132	G132p7	pup	female	21	oocyte pool	CV	9762	C	A	1158	1	0.0009	germline	ND3	nonsyn	tv	protein coding	CCT	C>A	0	1	1
G136_Oo_pool	G126	G136	G136	mother	female	299	oocyte pool	CV	9765	G	A	2067	2	0.001	germline	ND3	nonsyn	ti	protein coding	AGC	G>A	2	0	2
G137p2_Br	G126	G137	G137p2	pup	female	17	brain	CV	9765	G	A	3270	1	0.0003	somatic	ND3	nonsyn	ti	protein coding	AGC	G>A	2	0	2
G134p7_M	G129	G134	G134p7	pup	female	18	muscle	CV	9766	C	G	2453	1	0.0004	somatic	ND3	nonsyn	tv	protein coding	GCA	C>G	0	1	1
G137_M	G126	G137	G137	mother	female	320	muscle	CV	9771	G	A	2628	1	0.0004	somatic	ND3	nonsyn	ti	protein coding	TGA	G>A	1	0	1
G133_Oo2	G129	G133	G133	mother	female	308	single oocyte	FS	9793	A	G	272	1	0.0037	germline	ND3	nonsyn	ti	protein coding	GAA	A>G	0	1	1
G133p4_M	G129	G133	G133p4	pup	female	19	muscle	CV	9801	G	A	4363	1	0.0002	somatic	ND3	nonsyn	ti	protein coding	AGA	G>A	0	1	1
G132_M	G129	G132	G132	mother	female	312	muscle	CV	9804	T	C	2736	1	0.0004	somatic	ND3	nonsyn	ti	protein coding	GTA	T>C	0	1	1
G139_M	G126	G139	G139	mother	female	316	muscle	CV	9809	G	A	4398	1	0.0002	somatic	TrnR	-	ti	RNA	TGG	G>A	1	0	1
G134_Oo1	G129	G134	G134	mother	female	295	single oocyte	CV	9830	T	G	807	1	0.0012	germline	TrnR	-	tv	RNA	TTA	T>G	0	1	1
G139_M	G126	G139	G139	mother	female	316	muscle	CV	9840	G	A	4315	1	0.0002	somatic	TrnR	-	ti	RNA	CGA	CpG>CpA	1	0	1
G132p6_Oo4	G129	G132	G132p6	pup	female	21	single oocyte	FS	9858	G	A	152	1	0.0066	germline	TrnR	-	ti	RNA	TGA	G>A	0	1	1
G132p8_M	G129	G132	G132p8	pup	female	21	muscle	CV	9869	T	C	1612	1	0.0006	somatic	TrnR	-	ti	RNA	ATT	T>C	0	1	1
G137p3_Br	G126	G137	G137p3	pup	female	17	brain	CV	9875	A	G	957	1	0.001	somatic	TrnR	-	ti	RNA	AAT	A>G	1	0	1
G139p2_M	G126	G139	G139p2	pup	female	18	muscle	CV	9891	C	A	1244	1	0.0008	somatic	ND4L	nonsyn	tv	protein coding	TCT	C>A	1	0	1
G140p7_M	G126	G140	G140p7	pup	female	21	muscle	CV	9912	C	A	2194	1	0.0005	somatic	ND4L	nonsyn	tv	protein coding	TCT	C>A	2	0	2
G140p6_Oo3	G126	G140	G140p6	pup	female	21	single oocyte	FS	9912	C	A	468	1	0.0021	germline	ND4L	nonsyn	tv	protein coding	TCT	C>A	2	0	2
G132p1_M	G129	G132	G132p1	pup	male	19	muscle	CV	9926	T	C	1351	1	0.0007	somatic	ND4L	nonsyn	ti	protein coding	CTA	T>C	0	1	1
G133p4_M	G129	G133	G133p4	pup	female	19	muscle	CV	9947	C	A	4052	1	0.0003	somatic	ND4L	nonsyn	tv	protein coding	TCT	C>A	0	1	1
G140_Br	G126	G140	G140	mother	female	316	brain	CV	9976	G	A	2865	1	0.0004	somatic	ND4L	nonsyn	ti	protein coding	GGA	G>A	2	0	2
G139_M	G126	G139	G139	mother	female	316	muscle	CV	9976	G	A	4172	1	0.0002	somatic	ND4L	nonsyn	ti	protein coding	GGA	G>A	2	0	2
G140p7_M	G126	G140	G140p7	pup	female	21	muscle	CV	9979	G	A	2135	1	0.0005	somatic	ND4L	nonsyn	ti	protein coding	AGG	G>A	1	0	1
G134_Oo_pool	G129	G134	G134	mother	female	295	oocyte pool	CV	9985	G	T	262	1	0.0038	germline	ND4L	nonsyn	tv	protein coding	AGT	G>T	0	1	1
G132p9_M	G129	G132	G132p9	pup	female	21	muscle	CV	9985	G	A	976	1	0.001	somatic	ND4L	nonsyn	ti	protein coding	AGT	G>A	1	2	3
G139_M	G126	G139	G139	mother	female	316	muscle	CV	9985	G	A	4128	1	0.0002	somatic	ND4L	nonsyn	ti	protein coding	AGT	G>A	1	2	3
G134_Oo1	G129	G134	G134	mother	female	295	single oocyte	CV	9985	G	A	849	1	0.0012	germline	ND4L	nonsyn	ti	protein coding	AGT	G>A	1	2	3
G133_Oo4	G129	G133	G133	mother	female	308	single oocyte	FS	10020	C	A	203	1	0.0049	germline	ND4L	syn	tv	protein coding	CCC	C>A	0	1	1
G132p8_Br	G129	G132	G132p8	pup	female	21	brain	CV	10028	C	T	2477	1	0.0004	somatic	ND4L	nonsyn	ti	protein coding	TCC	C>T	0	1	1
G140p6_M	G126	G140	G140p6	pup	female	21	muscle	CV	10033	T	C	1747	1	0.0006	somatic	ND4L	nonsyn	ti	protein coding	CTC	T>C	1	0	1
G131_Br	G129	G131	G131	mother	female	291	brain	CV	10080	C	G	1836	1	0.0005	somatic	ND4L	syn	tv	protein coding	CCT	C>G	0	1	1
G140_M	G126	G140	G140	mother	female	316	muscle	CV	10084	G	A	3139	1	0.0003	somatic	ND4L	nonsyn	ti	protein coding	CGA	CpG>CpA	1	0	1
G136_Oo_pool	G126	G136	G136	mother	female	299	oocyte pool	CV	10087	G	T	2463	1	0.0004	germline	ND4L	nonsyn	tv	protein coding	AGC	G>T	1	0	1
G133p4_Br	G129	G133	G133p4	pup	female	19	brain	CV	10096	G	A	2490	1	0.0004	somatic	ND4L	nonsyn	ti	protein coding	AGG	G>A	0	1	1
G132p5_M	G129	G132	G132p5	pup	female	21	muscle	CV	10097	G	A	1763	1	0.0006	somatic	ND4L	nonsyn	ti	protein coding	GGA	G>A	0	1	1
G132p7_Br	G129	G132	G132p7	pup	female	21	brain	CV	10097	G	T	4898	1	0.0002	somatic	ND4L	nonsyn	tv	protein coding	GGA	G>T	0	1	1
G137_Oo2	G126	G137	G137	mother	female	320	single oocyte	FS	10104	C	A	818	1	0.0012	germline	ND4L	syn	tv	protein coding	CCC	C>A	1	0	1
G131p3_M	G129	G131	G131p3	pup	female	18	muscle	CV	10105	C	A	2484	1	0.0004	somatic	ND4L	nonsyn	tv	protein coding	CCT	C>A	0	1	1
G133_Oo5	G129	G133	G133	mother	female	308	single oocyte	FS	10109	T	C	368	1	0.0027	germline	ND4L	nonsyn	ti	protein coding	CTA	T>C	0	1	1
G137p4_M	G126	G137	G137p4	pup	male	18	muscle	CV	10117	G	A	1063	1	0.0009	somatic	ND4L	nonsyn	ti	protein coding	AGT	G>A	1	0	1
G136_Br	G126	G136	G136	mother	female	299	brain	CV	10128	G	A	2295	1	0.0004	somatic	ND4L	syn	ti	protein coding	CGT	CpG>CpA	1	0	1
G131p3_M	G129	G131	G131p3	pup	female	18	muscle	CV	10128	G	C	2503	1	0.0004	somatic	ND4L	syn	tv	protein coding	CGT	G>C	0	1	1
G137_Oo4	G126	G137	G137	mother	female	320	single oocyte	FS	10138	G	A	1410	1	0.0007	germline	ND4L	nonsyn	ti	protein coding	AGA	G>A	2	0	2
G140_Oo3	G126	G140	G140	mother	female	316	single oocyte	FS	10138	G	A	681	1	0.0015	germline	ND4L	nonsyn	ti	protein coding	AGA	G>A	2	0	2
G132p4_M	G129	G132	G132p4	pup	female	19	muscle	CV	10144	G	A	1122	1	0.0009	somatic	ND4L	nonsyn	ti	protein coding	CGT	CpG>CpA	0	2	2
G134_Oo1	G129	G134	G134	mother	female	295	single oocyte	CV	10144	G	A	914	1	0.0011	germline	ND4L	nonsyn	ti	protein coding	CGT	CpG>CpA	0	2	2
G140_Oo2	G126	G140	G140	mother	female	316	single oocyte	FS	10159	C	T	1128	1	0.0009	germline	ND4L	syn	ti	protein coding	CCT	C>T	1	0	1
G137p2_Br	G126	G137	G137p2	pup	female	17	brain	CV	10169	G	A	3019	1	0.0003	somatic	ND4	syn	ti	protein coding	TGC	G>A	1	0	1
G132p6_M	G129	G132	G132p6	pup	female	21	muscle	CV	10199	A	G	1399	2	0.0014	somatic	ND4	syn	ti	protein coding	TAC	A>G	0	1	1
G140p6_M	G126	G140	G140p6	pup	female	21	muscle	CV	10204	C	A	1659	1	0.0006	somatic	ND4	nonsyn	tv	protein coding	CCA	C>A	1	0	1
G132_Br	G129	G132	G132	mother	female	312	brain	CV	10204	C	G	777	1	0.0013	somatic	ND4	nonsyn	tv	protein coding	CCA	C>G	0	1	1
G132p4_Br	G129	G132	G132p4	pup	female	19	brain	CV	10222	G	A	1680	1	0.0006	somatic	ND4	nonsyn	ti	protein coding	AGC	G>A	0	2	2
G133_Br	G129	G133	G133	mother	female	308	brain	CV	10222	G	A	1888	1	0.0005	somatic	ND4	nonsyn	ti	protein coding	AGC	G>A	0	2	2
G133_M	G129	G133	G133	mother	female	308	muscle	CV	10227	A	T	2634	1	0.0004	somatic	ND4	nonsyn	tv	protein coding	TAA	A>T	0	1	1
G132_M	G129	G132	G132	mother	female	312	muscle	CV	10235	C	T	2510	1	0.0004	somatic	ND4	syn	ti	protein coding	CCT	C>T	0	1	1
G140p7_Br	G126	G140	G140p7	pup	female	21	brain	CV	10237	G	T	1402	1	0.0007	somatic	ND4	nonsyn	tv	protein coding	TGA	G>T	1	0	1
G139_Br	G126	G139	G139	mother	female	316	brain	CV	10245	G	A	3676	1	0.0003	somatic	ND4	nonsyn	ti	protein coding	CGT	CpG>CpA	2	0	2
G140_Br	G126	G140	G140	mother	female	316	brain	CV	10245	G	A	3313	1	0.0003	somatic	ND4	nonsyn	ti	protein coding	CGT	CpG>CpA	2	0	2
G137p5_Br	G126	G137	G137p5	pup	female	18	brain	CV	10258	G	A	2490	1	0.0004	somatic	ND4	nonsyn	ti	protein coding	AGT	G>A	1	0	1
G137p5_M	G126	G137	G137p5	pup	female	18	muscle	CV	10266	A	G	2767	1	0.0004	somatic	ND4	nonsyn	ti	protein coding	AAT	A>G	1	0	1
G131p2_M	G129	G131	G131p2	pup	male	18	muscle	CV	10270	G	C	2296	1	0.0004	somatic	ND4	nonsyn	tv	protein coding	AGT	G>C	0	1	1
G134_Oo1	G129	G134	G134	mother	female	295	single oocyte	CV	10279	G	A	876	1	0.0011	germline	ND4	nonsyn	ti	protein coding	AGC	G>A	0	1	1
G140p5_M	G126	G140	G140p5	pup	female	21	muscle	CV	10301	C	T	2377	1	0.0004	somatic	ND4	syn	ti	protein coding	CCG	CpG>TpG	1	0	1
G131_M	G129	G131	G131	mother	female	291	muscle	CV	10305	G	A	1496	1	0.0007	somatic	ND4	nonsyn	ti	protein coding	CGA	CpG>CpA	0	1	1
G132p1_M	G129	G132	G132p1	pup	male	19	muscle	CV	10354	C	G	1422	1	0.0007	somatic	ND4	nonsyn	tv	protein coding	ACA	C>G	0	1	1
G131p2_Br	G129	G131	G131p2	pup	male	18	brain	CV	10374	G	A	1747	1	0.0006	somatic	ND4	nonsyn	ti	protein coding	AGC	G>A	0	1	1
G137p5_M	G126	G137	G137p5	pup	female	18	muscle	CV	10378	G	C	2914	1	0.0003	somatic	ND4	nonsyn	tv	protein coding	TGA	G>C	1	0	1
G131p3_M	G129	G131	G131p3	pup	female	18	muscle	CV	10385	G	T	2690	1	0.0004	somatic	ND4	syn	tv	protein coding	TGC	G>T	0	1	1
G132p8_Br	G129	G132	G132p8	pup	female	21	brain	CV	10401	G	A	2786	1	0.0004	somatic	ND4	nonsyn	ti	protein coding	AGC	G>A	0	1	1
G140p1_Br	G126	G140	G140p1	pup	male	21	brain	CV	10401	G	C	4554	1	0.0002	somatic	ND4	nonsyn	tv	protein coding	AGC	G>C	1	0	1
G131p3_M	G129	G131	G131p3	pup	female	18	muscle	CV	10413	C	A	2723	1	0.0004	somatic	ND4	nonsyn	tv	protein coding	CCA	C>A	0	1	1
G132p8_Br	G129	G132	G132p8	pup	female	21	brain	CV	10425	G	C	2815	1	0.0004	somatic	ND4	nonsyn	tv	protein coding	AGA	G>C	0	1	1
G139_Br	G126	G139	G139	mother	female	316	brain	CV	10433	C	A	3885	1	0.0003	somatic	ND4	nonsyn	tv	protein coding	ACG	C>A	1	0	1
G131p3_Br	G129	G131	G131p3	pup	female	18	brain	CV	10440	C	A	2815	1	0.0004	somatic	ND4	nonsyn	tv	protein coding	ACA	C>A	0	1	1
G139p2_M	G126	G139	G139p2	pup	female	18	muscle	CV	10448	C	A	1461	1	0.0007	somatic	ND4	syn	tv	protein coding	TCT	C>A	1	0	1
G133_Br	G129	G133	G133	mother	female	308	brain	CV	10460	A	T	2046	1	0.0005	somatic	ND4	nonsyn	tv	protein coding	TAC	A>T	0	1	1
G133_M	G129	G133	G133	mother	female	308	muscle	CV	10464	A	G	3045	1	0.0003	somatic	ND4	nonsyn	ti	protein coding	AAT	A>G	0	1	1
G137p2_Br	G126	G137	G137p2	pup	female	17	brain	CV	10468	G	A	3471	1	0.0003	somatic	ND4	nonsyn	ti	protein coding	AGC	G>A	2	0	2
G140_M	G126	G140	G140	mother	female	316	muscle	CV	10468	G	A	3391	1	0.0003	somatic	ND4	nonsyn	ti	protein coding	AGC	G>A	2	0	2
G140p7_Br	G126	G140	G140p7	pup	female	21	brain	CV	10477	T	C	1459	1	0.0007	somatic	ND4	nonsyn	ti	protein coding	ATT	T>C	1	0	1
G132p8_Br	G129	G132	G132p8	pup	female	21	brain	CV	10506	G	A	2962	1	0.0003	somatic	ND4	nonsyn	ti	protein coding	TGA	G>A	0	1	1
G137p2_M	G126	G137	G137p2	pup	female	17	muscle	CV	10516	T	C	2204	2	0.0009	somatic	ND4	nonsyn	ti	protein coding	ATA	T>C	1	0	1
G139p2_M	G126	G139	G139p2	pup	female	18	muscle	CV	10540	C	A	1458	1	0.0007	somatic	ND4	nonsyn	tv	protein coding	ACC	C>A	1	0	1
G132p8_Br	G129	G132	G132p8	pup	female	21	brain	CV	10546	T	C	2908	1	0.0003	somatic	ND4	nonsyn	ti	protein coding	ATC	T>C	0	1	1
G132p2_M	G129	G132	G132p2	pup	male	19	muscle	CV	10547	C	T	3144	1	0.0003	somatic	ND4	syn	ti	protein coding	TCC	C>T	0	1	1
G139_Br	G126	G139	G139	mother	female	316	brain	CV	10549	C	T	3818	1	0.0003	somatic	ND4	nonsyn	ti	protein coding	CCA	C>T	1	0	1
G137p2_M	G126	G137	G137p2	pup	female	17	muscle	CV	10561	T	C	2258	1	0.0004	somatic	ND4	nonsyn	ti	protein coding	ATT	T>C	1	0	1
G139_Oo4	G126	G139	G139	mother	female	316	single oocyte	FS	10569	C	T	1192	1	0.0008	germline	ND4	nonsyn	ti	protein coding	CCG	CpG>TpG	1	0	1
G133_Oo2	G129	G133	G133	mother	female	308	single oocyte	FS	10574	A	G	317	1	0.0032	germline	ND4	syn	ti	protein coding	GAG	A>G	0	1	1
G132_Br	G129	G132	G132	mother	female	312	brain	CV	10576	G	A	786	1	0.0013	somatic	ND4	nonsyn	ti	protein coding	GGG	G>A	0	1	1
G136_Br	G126	G136	G136	mother	female	299	brain	CV	10577	G	A	2375	1	0.0004	somatic	ND4	syn	ti	protein coding	GGA	G>A	1	0	1
G132p9_M	G129	G132	G132p9	pup	female	21	muscle	CV	10578	A	G	1282	2	0.0016	somatic	ND4	nonsyn	ti	protein coding	GAA	A>G	0	1	1
G137_Br	G126	G137	G137	mother	female	320	brain	CV	10580	C	G	1454	1	0.0007	somatic	ND4	nonsyn	tv	protein coding	ACC	C>G	1	0	1
G139p1_Oo_pool	G126	G139	G139p1	pup	female	18	oocyte pool	CV	10590	C	A	588	1	0.0017	germline	ND4	nonsyn	tv	protein coding	ACG	C>A	1	0	1
G140p1_Br	G126	G140	G140p1	pup	male	21	brain	CV	10591	G	A	4773	1	0.0002	somatic	ND4	nonsyn	ti	protein coding	CGC	CpG>CpA	1	1	2
G133p4_M	G129	G133	G133p4	pup	female	19	muscle	CV	10591	G	A	4382	1	0.0002	somatic	ND4	nonsyn	ti	protein coding	CGC	CpG>CpA	1	1	2
G132p2_M	G129	G132	G132p2	pup	male	19	muscle	CV	10599	G	T	3176	1	0.0003	somatic	ND4	nonsyn	tv	protein coding	CGC	G>T	0	1	1
G133_Br	G129	G133	G133	mother	female	308	brain	CV	10604	G	A	2034	1	0.0005	somatic	ND4	syn	ti	protein coding	GGA	G>A	0	1	1
G133_Oo_pool	G129	G133	G133	mother	female	308	oocyte pool	CV	10631	C	A	1542	2	0.0013	germline	ND4	nonsyn	tv	protein coding	TCG	C>A	0	1	1
G132p7_Br	G129	G132	G132p7	pup	female	21	brain	CV	10632	G	A	5537	1	0.0002	somatic	ND4	nonsyn	ti	protein coding	CGG	CpG>CpA	0	1	1
G132_Oo3	G129	G132	G132	mother	female	312	single oocyte	FS	10635	T	C	272	1	0.0037	germline	ND4	nonsyn	ti	protein coding	TTC	T>C	0	1	1
G132_M	G129	G132	G132	mother	female	312	muscle	CV	10642	C	A	2887	1	0.0004	somatic	ND4	nonsyn	tv	protein coding	CCA	C>A	0	1	1
G139p2_M	G126	G139	G139p2	pup	female	18	muscle	CV	10646	G	A	1396	1	0.0007	somatic	ND4	syn	ti	protein coding	TGC	G>A	1	0	1
G132p6_Br	G129	G132	G132p6	pup	female	21	brain	CV	10655	C	A	983	1	0.001	somatic	ND4	syn	tv	protein coding	CCC	C>A	0	1	1
G139_M	G126	G139	G139	mother	female	316	muscle	CV	10676	T	C	4742	1	0.0002	somatic	ND4	syn	ti	protein coding	ATG	T>C	1	0	1
G131_Br	G129	G131	G131	mother	female	291	brain	CV	10678	T	A	2041	1	0.0005	somatic	ND4	nonsyn	tv	protein coding	GTA	T>A	0	1	1
G132_M	G129	G132	G132	mother	female	312	muscle	CV	10680	G	A	2836	1	0.0004	somatic	ND4	nonsyn	ti	protein coding	AGG	G>A	0	1	1
G133p2_Br	G129	G133	G133p2	pup	male	19	brain	CV	10697	A	T	2602	1	0.0004	somatic	ND4	nonsyn	tv	protein coding	TAA	A>T	0	1	1
G139_M	G126	G139	G139	mother	female	316	muscle	CV	10705	C	A	4817	1	0.0002	somatic	ND4	nonsyn	tv	protein coding	TCA	C>A	1	0	1
G133p4_M	G129	G133	G133p4	pup	female	19	muscle	CV	10705	C	T	4394	1	0.0002	somatic	ND4	nonsyn	ti	protein coding	TCA	C>T	0	1	1
G133_Br	G129	G133	G133	mother	female	308	brain	CV	10707	T	C	1959	1	0.0005	somatic	ND4	nonsyn	ti	protein coding	ATT	T>C	0	1	1
G136_Oo_pool	G126	G136	G136	mother	female	299	oocyte pool	CV	10709	C	A	2380	1	0.0004	germline	ND4	nonsyn	tv	protein coding	TCA	C>A	1	0	1
G132p8_Br	G129	G132	G132p8	pup	female	21	brain	CV	10749	C	A	2889	1	0.0004	somatic	ND4	nonsyn	tv	protein coding	ACT	C>A	1	1	2
G140p1_Br	G126	G140	G140p1	pup	male	21	brain	CV	10749	C	A	4765	1	0.0002	somatic	ND4	nonsyn	tv	protein coding	ACT	C>A	1	1	2
G131_Oo5	G129	G131	G131	mother	female	291	single oocyte	FS	10770	G	A	179	1	0.0056	germline	ND4	nonsyn	ti	protein coding	AGC	G>A	0	1	1
G136_Oo6	G126	G136	G136	mother	female	299	single oocyte	FS	10771	C	A	845	1	0.0012	germline	ND4	nonsyn	tv	protein coding	GCA	C>A	1	0	1
G139_M	G126	G139	G139	mother	female	316	muscle	CV	10783	A	G	4792	1	0.0002	somatic	ND4	nonsyn	ti	protein coding	AAA	A>G	1	0	1
G139p1_M	G126	G139	G139p1	pup	female	18	muscle	CV	10810	G	A	2048	1	0.0005	somatic	ND4	nonsyn	ti	protein coding	TGA	G>A	1	0	1
G134p7_Br	G129	G134	G134p7	pup	female	18	brain	CV	10821	G	A	1012	1	0.001	somatic	ND4	nonsyn	ti	protein coding	AGC	G>A	0	1	1
G140_M	G126	G140	G140	mother	female	316	muscle	CV	10830	G	A	3665	1	0.0003	somatic	ND4	nonsyn	ti	protein coding	TGA	G>A	1	0	1
G137p1_M	G126	G137	G137p1	pup	male	17	muscle	CV	10832	A	G	993	1	0.001	somatic	ND4	syn	ti	protein coding	AAG	A>G	1	0	1
G133_M	G129	G133	G133	mother	female	308	muscle	CV	10833	G	A	3077	1	0.0003	somatic	ND4	nonsyn	ti	protein coding	AGC	G>A	0	1	1
G131_Oo6	G129	G131	G131	mother	female	291	single oocyte	FS	10845	G	A	99	1	0.0101	germline	ND4	nonsyn	ti	protein coding	TGG	G>A	1	1	2
G137_Oo2	G126	G137	G137	mother	female	320	single oocyte	FS	10845	G	A	879	1	0.0011	germline	ND4	nonsyn	ti	protein coding	TGG	G>A	1	1	2
G139_M	G126	G139	G139	mother	female	316	muscle	CV	10846	G	A	4975	1	0.0002	somatic	ND4	nonsyn	ti	protein coding	GGG	G>A	1	0	1
G132p4_Br	G129	G132	G132p4	pup	female	19	brain	CV	10857	C	A	1825	1	0.0006	somatic	ND4	nonsyn	tv	protein coding	TCT	C>A	0	1	1
G133_M	G129	G133	G133	mother	female	308	muscle	CV	10860	G	A	3044	1	0.0003	somatic	ND4	nonsyn	ti	protein coding	AGC	G>A	1	1	2
G137_M	G126	G137	G137	mother	female	320	muscle	CV	10860	G	A	2871	1	0.0004	somatic	ND4	nonsyn	ti	protein coding	AGC	G>A	1	1	2
G137_Oo2	G126	G137	G137	mother	female	320	single oocyte	FS	10863	G	A	880	1	0.0011	germline	ND4	nonsyn	ti	protein coding	AGC	G>A	1	0	1
G140p5_Br	G126	G140	G140p5	pup	female	21	brain	CV	10863	G	C	2176	1	0.0005	somatic	ND4	nonsyn	tv	protein coding	AGC	G>C	1	0	1
G133_M	G129	G133	G133	mother	female	308	muscle	CV	10900	G	A	3076	1	0.0003	somatic	ND4	nonsyn	ti	protein coding	CGC	CpG>CpA	0	1	1
G133_Oo1	G129	G133	G133	mother	female	308	single oocyte	FS	10904	C	A	861	1	0.0012	germline	ND4	nonsyn	tv	protein coding	TCT	C>A	0	1	1
G137_M	G126	G137	G137	mother	female	320	muscle	CV	10918	A	G	2822	1	0.0004	somatic	ND4	nonsyn	ti	protein coding	GAC	A>G	1	0	1
G132p4_Br	G129	G132	G132p4	pup	female	19	brain	CV	10919	C	A	1760	1	0.0006	somatic	ND4	nonsyn	tv	protein coding	ACC	C>A	0	1	1
G139p1_Br	G126	G139	G139p1	pup	female	18	brain	CV	10938	G	A	1326	1	0.0008	somatic	ND4	nonsyn	ti	protein coding	AGC	G>A	1	0	1
G132p3_M	G129	G132	G132p3	pup	female	19	muscle	CV	10962	C	A	1975	1	0.0005	somatic	ND4	nonsyn	tv	protein coding	CCT	C>A	0	1	1
G137_M	G126	G137	G137	mother	female	320	muscle	CV	10966	G	A	2810	1	0.0004	somatic	ND4	nonsyn	ti	protein coding	TGA	G>A	1	0	1
G140_M	G126	G140	G140	mother	female	316	muscle	CV	10968	G	A	3603	1	0.0003	somatic	ND4	nonsyn	ti	protein coding	AGG	G>A	1	0	1
G139p2_M	G126	G139	G139p2	pup	female	18	muscle	CV	10981	C	A	1442	1	0.0007	somatic	ND4	nonsyn	tv	protein coding	ACT	C>A	1	0	1
G134_M	G129	G134	G134	mother	female	295	muscle	CV	10994	C	T	761	1	0.0013	somatic	ND4	syn	ti	protein coding	GCT	C>T	0	1	1
G133_Oo1	G129	G133	G133	mother	female	308	single oocyte	FS	10997	A	G	916	1	0.0011	germline	ND4	syn	ti	protein coding	TAC	A>G	0	1	1
G140p7_Br	G126	G140	G140p7	pup	female	21	brain	CV	10999	G	T	1426	1	0.0007	somatic	ND4	nonsyn	tv	protein coding	CGC	G>T	1	0	1
G132p8_Br	G129	G132	G132p8	pup	female	21	brain	CV	10999	G	A	2854	1	0.0004	somatic	ND4	nonsyn	ti	protein coding	CGC	CpG>CpA	1	1	2
G137_M	G126	G137	G137	mother	female	320	muscle	CV	10999	G	A	2750	1	0.0004	somatic	ND4	nonsyn	ti	protein coding	CGC	CpG>CpA	1	1	2
G140p6_Br	G126	G140	G140p6	pup	female	21	brain	CV	11007	G	A	4918	1	0.0002	somatic	ND4	nonsyn	ti	protein coding	AGA	G>A	1	0	1
G139p2_Br	G126	G139	G139p2	pup	female	18	brain	CV	11007	G	T	1289	1	0.0008	somatic	ND4	nonsyn	tv	protein coding	AGA	G>T	1	0	1
G140p6_Br	G126	G140	G140p6	pup	female	21	brain	CV	11017	C	A	4909	1	0.0002	somatic	ND4	nonsyn	tv	protein coding	TCA	C>A	1	0	1
G133_Br	G129	G133	G133	mother	female	308	brain	CV	11019	C	T	1998	1	0.0005	somatic	ND4	syn	ti	protein coding	ACT	C>T	0	1	1
G132p2_Br	G129	G132	G132p2	pup	male	19	brain	CV	11025	G	A	2451	1	0.0004	somatic	ND4	nonsyn	ti	protein coding	CGC	CpG>CpA	0	1	1
G140_Oo4	G126	G140	G140	mother	female	316	single oocyte	FS	11030	C	A	417	1	0.0024	germline	ND4	nonsyn	tv	protein coding	ACT	C>A	1	0	1
G140_Br	G126	G140	G140	mother	female	316	brain	CV	11041	G	A	3313	1	0.0003	somatic	ND4	nonsyn	ti	protein coding	AGC	G>A	1	1	2
G132_M	G129	G132	G132	mother	female	312	muscle	CV	11041	G	A	2814	1	0.0004	somatic	ND4	nonsyn	ti	protein coding	AGC	G>A	1	1	2
G132p6_Oo2	G129	G132	G132p6	pup	female	21	single oocyte	FS	11042	C	T	438	1	0.0023	germline	ND4	syn	ti	protein coding	GCC	C>T	0	1	1
G139_Oo4	G126	G139	G139	mother	female	316	single oocyte	FS	11044	A	G	1402	1	0.0007	germline	ND4	nonsyn	ti	protein coding	CAC	A>G	1	0	1
G131p2_Br	G129	G131	G131p2	pup	male	18	brain	CV	11045	C	T	1762	1	0.0006	somatic	ND4	syn	ti	protein coding	ACA	C>T	0	1	1
G132p8_Br	G129	G132	G132p8	pup	female	21	brain	CV	11049	G	A	2948	1	0.0003	somatic	ND4	nonsyn	ti	protein coding	AGC	G>A	1	2	3
G140p5_Br	G126	G140	G140p5	pup	female	21	brain	CV	11049	G	A	2164	1	0.0005	somatic	ND4	nonsyn	ti	protein coding	AGC	G>A	1	2	3
G132_M	G129	G132	G132	mother	female	312	muscle	CV	11049	G	A	2829	1	0.0004	somatic	ND4	nonsyn	ti	protein coding	AGC	G>A	1	2	3
G140p7_Oo_pool	G126	G140	G140p7	pup	female	21	oocyte pool	CV	11056	T	A	1325	1	0.0008	germline	ND4	nonsyn	tv	protein coding	GTT	T>A	1	0	1
G140_M	G126	G140	G140	mother	female	316	muscle	CV	11081	T	C	3807	1	0.0003	somatic	ND4	syn	ti	protein coding	CTC	T>C	1	0	1
G139_M	G126	G139	G139	mother	female	316	muscle	CV	11082	C	T	5219	1	0.0002	somatic	ND4	nonsyn	ti	protein coding	TCC	C>T	1	0	1
G139_Br	G126	G139	G139	mother	female	316	brain	CV	11086	G	T	4323	1	0.0002	somatic	ND4	nonsyn	tv	protein coding	TGA	G>T	1	0	1
G139_Oo3	G126	G139	G139	mother	female	316	single oocyte	FS	11096	A	G	1194	1	0.0008	germline	ND4	syn	ti	protein coding	TAG	A>G	1	0	1
G140_Br	G126	G140	G140	mother	female	316	brain	CV	11097	G	A	3507	1	0.0003	somatic	ND4	nonsyn	ti	protein coding	AGG	G>A	1	0	1
G132p1_M	G129	G132	G132p1	pup	male	19	muscle	CV	11098	G	A	1547	1	0.0007	somatic	ND4	nonsyn	ti	protein coding	GGA	G>A	2	1	3
G137_M	G126	G137	G137	mother	female	320	muscle	CV	11098	G	A	2863	1	0.0004	somatic	ND4	nonsyn	ti	protein coding	GGA	G>A	2	1	3
G140_M	G126	G140	G140	mother	female	316	muscle	CV	11098	G	A	3806	1	0.0003	somatic	ND4	nonsyn	ti	protein coding	GGA	G>A	2	1	3
G131p3_M	G129	G131	G131p3	pup	female	18	muscle	CV	11109	C	A	2724	1	0.0004	somatic	ND4	nonsyn	tv	protein coding	ACT	C>A	0	1	1
G140_M	G126	G140	G140	mother	female	316	muscle	CV	11117	C	T	3876	1	0.0003	somatic	ND4	syn	ti	protein coding	TCG	CpG>TpG	1	0	1
G140p6_Br	G126	G140	G140p6	pup	female	21	brain	CV	11139	C	A	5174	1	0.0002	somatic	ND4	nonsyn	tv	protein coding	ACT	C>A	1	0	1
G139_M	G126	G139	G139	mother	female	316	muscle	CV	11142	C	A	5457	2	0.0004	somatic	ND4	nonsyn	tv	protein coding	CCT	C>A	1	0	1
G132p6_Oo4	G129	G132	G132p6	pup	female	21	single oocyte	FS	11149	G	A	167	1	0.006	germline	ND4	nonsyn	ti	protein coding	TGC	G>A	0	1	1
G140p7_M	G126	G140	G140p7	pup	female	21	muscle	CV	11149	G	T	2991	1	0.0003	somatic	ND4	nonsyn	tv	protein coding	TGC	G>T	1	0	1
G136_Br	G126	G136	G136	mother	female	299	brain	CV	11154	G	A	2566	1	0.0004	somatic	ND4	nonsyn	ti	protein coding	AGC	G>A	2	1	3
G133_M	G129	G133	G133	mother	female	308	muscle	CV	11154	G	A	3228	1	0.0003	somatic	ND4	nonsyn	ti	protein coding	AGC	G>A	2	1	3
G140_M	G126	G140	G140	mother	female	316	muscle	CV	11154	G	A	3943	1	0.0003	somatic	ND4	nonsyn	ti	protein coding	AGC	G>A	2	1	3
G131p2_M	G129	G131	G131p2	pup	male	18	muscle	CV	11160	T	C	2476	2	0.0008	somatic	ND4	nonsyn	ti	protein coding	CTC	T>C	0	1	1
G133p2_Br	G129	G133	G133p2	pup	male	19	brain	CV	11173	G	A	2654	1	0.0004	somatic	ND4	nonsyn	ti	protein coding	CGG	CpG>CpA	0	1	1
G132p3_M	G129	G132	G132p3	pup	female	19	muscle	CV	11174	G	A	2111	1	0.0005	somatic	ND4	syn	ti	protein coding	GGA	G>A	0	1	1
G139_Oo2	G126	G139	G139	mother	female	316	single oocyte	FS	11185	G	A	569	1	0.0018	germline	ND4	nonsyn	ti	protein coding	CGT	CpG>CpA	1	0	1
G132p3_M	G129	G132	G132p3	pup	female	19	muscle	CV	11200	C	A	2117	1	0.0005	somatic	ND4	nonsyn	tv	protein coding	GCC	C>A	0	1	1
G137p1_Br	G126	G137	G137p1	pup	male	17	brain	CV	11203	G	T	3456	2	0.0006	somatic	ND4	nonsyn	tv	protein coding	CGA	G>T	1	0	1
G140p6_Br	G126	G140	G140p6	pup	female	21	brain	CV	11203	G	A	5154	1	0.0002	somatic	ND4	nonsyn	ti	protein coding	CGA	CpG>CpA	2	1	3
G131_M	G129	G131	G131	mother	female	291	muscle	CV	11203	G	A	1604	1	0.0006	somatic	ND4	nonsyn	ti	protein coding	CGA	CpG>CpA	2	1	3
G136_Oo3	G126	G136	G136	mother	female	299	single oocyte	FS	11203	G	A	772	1	0.0013	germline	ND4	nonsyn	ti	protein coding	CGA	CpG>CpA	2	1	3
G132p1_Br	G129	G132	G132p1	pup	male	19	brain	CV	11205	G	A	1518	1	0.0007	somatic	ND4	nonsyn	ti	protein coding	AGG	G>A	0	1	1
G132p2_M	G129	G132	G132p2	pup	male	19	muscle	CV	11219	C	A	3315	1	0.0003	somatic	ND4	syn	tv	protein coding	TCT	C>A	0	1	1
G132p7_Br	G129	G132	G132p7	pup	female	21	brain	CV	11238	T	C	5815	1	0.0002	somatic	ND4	nonsyn	ti	protein coding	ATG	T>C	0	1	1
G131p3_Br	G129	G131	G131p3	pup	female	18	brain	CV	11239	G	A	3128	1	0.0003	somatic	ND4	nonsyn	ti	protein coding	TGA	G>A	1	2	3
G134_Br	G129	G134	G134	mother	female	295	brain	CV	11239	G	A	151	1	0.0066	somatic	ND4	nonsyn	ti	protein coding	TGA	G>A	1	2	3
G137p1_M	G126	G137	G137p1	pup	male	17	muscle	CV	11239	G	A	1100	1	0.0009	somatic	ND4	nonsyn	ti	protein coding	TGA	G>A	1	2	3
G140_M	G126	G140	G140	mother	female	316	muscle	CV	11250	G	A	3964	1	0.0003	somatic	ND4	nonsyn	ti	protein coding	AGC	G>A	1	0	1
G131p2_Br	G129	G131	G131p2	pup	male	18	brain	CV	11259	G	A	1770	1	0.0006	somatic	ND4	nonsyn	ti	protein coding	AGC	G>A	0	2	2
G133_M	G129	G133	G133	mother	female	308	muscle	CV	11259	G	A	3225	1	0.0003	somatic	ND4	nonsyn	ti	protein coding	AGC	G>A	0	2	2
G133_Oo1	G129	G133	G133	mother	female	308	single oocyte	FS	11273	A	G	898	1	0.0011	germline	ND4	syn	ti	protein coding	TAC	A>G	0	1	1
G137p2_M	G126	G137	G137p2	pup	female	17	muscle	CV	11300	A	G	2202	1	0.0005	somatic	ND4	syn	ti	protein coding	AAT	A>G	1	0	1
G139_M	G126	G139	G139	mother	female	316	muscle	CV	11302	T	C	5643	1	0.0002	somatic	ND4	nonsyn	ti	protein coding	TTA	T>C	1	0	1
G137p3_Br	G126	G137	G137p3	pup	female	17	brain	CV	11306	C	A	1044	1	0.001	somatic	ND4	nonsyn	tv	protein coding	TCA	C>A	1	0	1
G133p4_M	G129	G133	G133p4	pup	female	19	muscle	CV	11306	C	T	5331	1	0.0002	somatic	ND4	syn	ti	protein coding	TCA	C>T	0	1	1
G140p7_Oo2	G126	G140	G140p7	pup	female	21	single oocyte	FS	11311	C	T	431	1	0.0023	germline	ND4	nonsyn	ti	protein coding	ACC	C>T	1	0	1
G132p7_Br	G129	G132	G132p7	pup	female	21	brain	CV	11326	C	A	5804	1	0.0002	somatic	ND4	nonsyn	tv	protein coding	TCT	C>A	1	1	2
G137p2_Oo1	G126	G137	G137p2	pup	female	17	single oocyte	CV	11326	C	A	570	1	0.0018	germline	ND4	nonsyn	tv	protein coding	TCT	C>A	1	1	2
G139p1_M	G126	G139	G139p1	pup	female	18	muscle	CV	11329	G	T	2095	1	0.0005	somatic	ND4	nonsyn	tv	protein coding	TGA	G>T	1	0	1
G133p4_Br	G129	G133	G133p4	pup	female	19	brain	CV	11329	G	A	3110	1	0.0003	somatic	ND4	nonsyn	ti	protein coding	TGA	G>A	1	1	2
G137_Br	G126	G137	G137	mother	female	320	brain	CV	11329	G	A	1591	1	0.0006	somatic	ND4	nonsyn	ti	protein coding	TGA	G>A	1	1	2
G132_M	G129	G132	G132	mother	female	312	muscle	CV	11341	C	A	3218	1	0.0003	somatic	ND4	nonsyn	tv	protein coding	ACC	C>A	0	1	1
G139_Br	G126	G139	G139	mother	female	316	brain	CV	11355	G	A	4697	1	0.0002	somatic	ND4	nonsyn	ti	protein coding	AGG	G>A	1	0	1
G136_Br	G126	G136	G136	mother	female	299	brain	CV	11356	G	A	2314	1	0.0004	somatic	ND4	nonsyn	ti	protein coding	GGA	G>A	1	0	1
G140p5_Br	G126	G140	G140p5	pup	female	21	brain	CV	11356	G	T	2407	1	0.0004	somatic	ND4	nonsyn	tv	protein coding	GGA	G>T	1	0	1
G140p7_Br	G126	G140	G140p7	pup	female	21	brain	CV	11402	T	C	1519	1	0.0007	somatic	ND4	syn	ti	protein coding	TTA	T>C	1	0	1
G140p7_M	G126	G140	G140p7	pup	female	21	muscle	CV	11404	C	T	3132	1	0.0003	somatic	ND4	nonsyn	ti	protein coding	ACC	C>T	1	0	1
G140_Br	G126	G140	G140	mother	female	316	brain	CV	11443	T	A	4364	1	0.0002	somatic	ND4	nonsyn	tv	protein coding	CTC	T>A	1	0	1
G132p6_Oo4	G129	G132	G132p6	pup	female	21	single oocyte	FS	11445	C	A	122	1	0.0082	germline	ND4	nonsyn	tv	protein coding	CCA	C>A	0	1	1
G133_M	G129	G133	G133	mother	female	308	muscle	CV	11466	C	A	3647	1	0.0003	somatic	ND4	nonsyn	tv	protein coding	ACT	C>A	0	1	1
G136_Br	G126	G136	G136	mother	female	299	brain	CV	11478	G	A	2585	1	0.0004	somatic	ND4	nonsyn	ti	protein coding	AGC	G>A	1	0	1
G140_Br	G126	G140	G140	mother	female	316	brain	CV	11502	C	A	4551	1	0.0002	somatic	ND4	nonsyn	tv	protein coding	TCT	C>A	1	0	1
G139p1_Br	G126	G139	G139p1	pup	female	18	brain	CV	11533	G	A	1323	1	0.0008	somatic	ND4	nonsyn	ti	protein coding	GGC	G>A	1	1	2
G133p3_M	G129	G133	G133p3	pup	female	19	muscle	CV	11533	G	A	5242	1	0.0002	somatic	ND4	nonsyn	ti	protein coding	GGC	G>A	1	1	2
G132p7_Br	G129	G132	G132p7	pup	female	21	brain	CV	11545	G	A	5887	1	0.0002	somatic	-	-	ti	-	TGT	G>A	2	1	3
G140_Br	G126	G140	G140	mother	female	316	brain	CV	11545	G	A	4338	1	0.0002	somatic	-	-	ti	-	TGT	G>A	2	1	3
G136_Oo6	G126	G136	G136	mother	female	299	single oocyte	FS	11545	G	A	732	1	0.0014	germline	-	-	ti	-	TGT	G>A	2	1	3
G133p1_Br	G129	G133	G133p1	pup	male	19	brain	CV	11549	A	G	763	1	0.0013	somatic	TrnH	-	ti	RNA	AAT	A>G	0	1	1
G132p7_Br	G129	G132	G132p7	pup	female	21	brain	CV	11571	G	T	5773	1	0.0002	somatic	TrnH	-	tv	RNA	AGA	G>T	0	1	1
G140_M	G126	G140	G140	mother	female	316	muscle	CV	11577	G	A	3826	1	0.0003	somatic	TrnH	-	ti	RNA	TGA	G>A	1	0	1
G140p1_Br	G126	G140	G140p1	pup	male	21	brain	CV	11619	G	A	4799	3	0.0006	somatic	TrnS2	-	ti	RNA	AGA	G>A	2	0	2
G137_M	G126	G137	G137	mother	female	320	muscle	CV	11619	G	A	3041	1	0.0003	somatic	TrnS2	-	ti	RNA	AGA	G>A	2	0	2
G132p2_M	G129	G132	G132p2	pup	male	19	muscle	CV	11632	G	A	3271	1	0.0003	somatic	TrnS2	-	ti	RNA	TGC	G>A	0	1	1
G140p7_Oo3	G126	G140	G140p7	pup	female	21	single oocyte	FS	11635	A	G	367	1	0.0027	germline	TrnS2	-	ti	RNA	TAA	A>G	1	0	1
G134_Br	G129	G134	G134	mother	female	295	brain	CV	11639	C	A	155	1	0.0065	somatic	TrnS2	-	tv	RNA	TCA	C>A	0	1	1
G132p1_Br	G129	G132	G132p1	pup	male	19	brain	CV	11650	G	A	1506	1	0.0007	somatic	TrnS2	-	ti	RNA	TGT	G>A	0	1	1
G137_Oo4	G126	G137	G137	mother	female	320	single oocyte	FS	11652	T	C	1390	1	0.0007	germline	TrnS2	-	ti	RNA	TTT	T>C	1	0	1
G140p6_Oo_pool	G126	G140	G140p6	pup	female	21	oocyte pool	CV	11663	G	A	1027	1	0.001	germline	TrnS2	-	ti	RNA	GGC	G>A	1	0	1
G132p4_Br	G129	G132	G132p4	pup	female	19	brain	CV	11680	G	A	1944	1	0.0005	somatic	TrnL2	-	ti	RNA	AGG	G>A	0	1	1
G140p6_Br	G126	G140	G140p6	pup	female	21	brain	CV	11693	C	A	4830	1	0.0002	somatic	TrnL2	-	tv	RNA	TCC	C>A	1	0	1
G133_M	G129	G133	G133	mother	female	308	muscle	CV	11699	G	A	2990	1	0.0003	somatic	TrnL2	-	ti	RNA	GGT	G>A	0	1	1
G137_M	G126	G137	G137	mother	female	320	muscle	CV	11705	G	A	2776	1	0.0004	somatic	TrnL2	-	ti	RNA	AGG	G>A	1	0	1
G137p3_Oo6	G126	G137	G137p3	pup	female	17	single oocyte	FS	11718	T	C	73	1	0.0137	germline	TrnL2	-	ti	RNA	CTT	T>C	1	0	1
G139_Br	G126	G139	G139	mother	female	316	brain	CV	11720	G	A	3937	1	0.0003	somatic	TrnL2	-	ti	RNA	TGG	G>A	1	0	1
G137p5_Oo_pool	G126	G137	G137p5	pup	female	18	oocyte pool	CV	11721	G	A	453	1	0.0022	germline	TrnL2	-	ti	RNA	GGT	G>A	1	0	1
G133_Oo5	G129	G133	G133	mother	female	308	single oocyte	FS	11727	A	G	332	1	0.003	germline	TrnL2	-	ti	RNA	AAT	A>G	0	1	1
G137p1_M	G126	G137	G137p1	pup	male	17	muscle	CV	11728	T	C	946	1	0.0011	somatic	TrnL2	-	ti	RNA	ATC	T>C	1	0	1
G139p1_Br	G126	G139	G139p1	pup	female	18	brain	CV	11730	C	A	1205	1	0.0008	somatic	TrnL2	-	tv	RNA	CCA	C>A	1	0	1
G136_Br	G126	G136	G136	mother	female	299	brain	CV	11739	G	A	2344	1	0.0004	somatic	TrnL2	-	ti	RNA	AGT	G>A	1	0	1
G137p1_Br	G126	G137	G137p1	pup	male	17	brain	CV	11739	G	C	2885	1	0.0004	somatic	TrnL2	-	tv	RNA	AGT	G>C	1	0	1
G131p2_Br	G129	G131	G131p2	pup	male	18	brain	CV	11739	G	T	1674	1	0.0006	somatic	TrnL2	-	tv	RNA	AGT	G>T	0	1	1
G136_Oo6	G126	G136	G136	mother	female	299	single oocyte	FS	11752	T	C	664	1	0.0015	germline	ND5	nonsyn	ti	protein coding	TTC	T>C	1	0	1
G133p3_Oo_pool	G129	G133	G133p3	pup	female	19	oocyte pool	CV	11761	C	T	828	1	0.0012	germline	ND5	nonsyn	ti	protein coding	TCA	C>T	0	1	1
G131_Br	G129	G131	G131	mother	female	291	brain	CV	11771	A	T	1962	1	0.0005	somatic	ND5	nonsyn	tv	protein coding	TAA	A>T	0	1	1
G133p2_Br	G129	G133	G133p2	pup	male	19	brain	CV	11774	C	T	2400	1	0.0004	somatic	ND5	syn	ti	protein coding	TCT	C>T	0	1	1
G140p7_M	G126	G140	G140p7	pup	female	21	muscle	CV	11790	T	C	2434	1	0.0004	somatic	ND5	nonsyn	ti	protein coding	ATC	T>C	1	0	1
G137p4_M	G126	G137	G137p4	pup	male	18	muscle	CV	11811	T	C	1181	1	0.0009	somatic	ND5	nonsyn	ti	protein coding	ATC	T>C	1	0	1
G139_M	G126	G139	G139	mother	female	316	muscle	CV	11838	C	G	4821	1	0.0002	somatic	ND5	nonsyn	tv	protein coding	CCC	C>G	1	0	1
G140p5_M	G126	G140	G140p5	pup	female	21	muscle	CV	11839	C	T	2733	1	0.0004	somatic	ND5	nonsyn	ti	protein coding	CCA	C>T	1	0	1
G136_Oo3	G126	G136	G136	mother	female	299	single oocyte	FS	11852	C	T	636	1	0.0016	germline	ND5	syn	ti	protein coding	CCA	C>T	1	0	1
G132p1_M	G129	G132	G132p1	pup	male	19	muscle	CV	11872	T	C	1521	1	0.0007	somatic	ND5	nonsyn	ti	protein coding	TTC	T>C	0	1	1
G132p3_Br	G129	G132	G132p3	pup	female	19	brain	CV	11885	C	A	1219	1	0.0008	somatic	ND5	syn	tv	protein coding	TCT	C>A	0	1	1
G133p4_M	G129	G133	G133p4	pup	female	19	muscle	CV	11885	C	T	4444	1	0.0002	somatic	ND5	syn	ti	protein coding	TCT	C>T	0	1	1
G132p6_Br	G129	G132	G132p6	pup	female	21	brain	CV	11890	C	G	875	1	0.0011	somatic	ND5	nonsyn	tv	protein coding	CCC	C>G	0	1	1
G140p6_Br	G126	G140	G140p6	pup	female	21	brain	CV	11914	A	G	4906	1	0.0002	somatic	ND5	nonsyn	ti	protein coding	AAT	A>G	1	0	1
G134p7_M	G129	G134	G134p7	pup	female	18	muscle	CV	11919	G	A	2490	1	0.0004	somatic	ND5	nonsyn	ti	protein coding	AGA	G>A	0	1	1
G137p2_M	G126	G137	G137p2	pup	female	17	muscle	CV	11938	G	A	2278	1	0.0004	somatic	ND5	nonsyn	ti	protein coding	TGG	G>A	2	0	2
G139_M	G126	G139	G139	mother	female	316	muscle	CV	11938	G	A	4808	1	0.0002	somatic	ND5	nonsyn	ti	protein coding	TGG	G>A	2	0	2
G133p2_M	G129	G133	G133p2	pup	male	19	muscle	CV	11939	G	A	882	1	0.0011	somatic	ND5	syn	ti	protein coding	GGC	G>A	0	1	1
G136_Br	G126	G136	G136	mother	female	299	brain	CV	11946	G	A	2353	1	0.0004	somatic	ND5	nonsyn	ti	protein coding	AGT	G>A	2	0	2
G140_Oo2	G126	G140	G140	mother	female	316	single oocyte	FS	11946	G	A	1014	1	0.001	germline	ND5	nonsyn	ti	protein coding	AGT	G>A	2	0	2
G133_Br	G129	G133	G133	mother	female	308	brain	CV	11959	C	T	1956	1	0.0005	somatic	ND5	nonsyn	ti	protein coding	TCA	C>T	0	1	1
G132p8_M	G129	G132	G132p8	pup	female	21	muscle	CV	12005	G	A	1584	1	0.0006	somatic	ND5	syn	ti	protein coding	TGT	G>A	1	1	2
G139_M	G126	G139	G139	mother	female	316	muscle	CV	12005	G	A	4883	1	0.0002	somatic	ND5	syn	ti	protein coding	TGT	G>A	1	1	2
G133_M	G129	G133	G133	mother	female	308	muscle	CV	12019	C	G	2935	1	0.0003	somatic	ND5	nonsyn	tv	protein coding	GCC	C>G	0	1	1
G134_Oo1	G129	G134	G134	mother	female	295	single oocyte	CV	12027	G	A	809	1	0.0012	germline	ND5	nonsyn	ti	protein coding	TGT	G>A	0	1	1
G132p3_M	G129	G132	G132p3	pup	female	19	muscle	CV	12040	T	C	1872	1	0.0005	somatic	ND5	nonsyn	ti	protein coding	ATT	T>C	0	1	1
G131p3_M	G129	G131	G131p3	pup	female	18	muscle	CV	12041	T	C	2498	1	0.0004	somatic	ND5	syn	ti	protein coding	TTA	T>C	0	1	1
G140p6_Br	G126	G140	G140p6	pup	female	21	brain	CV	12046	A	G	4773	1	0.0002	somatic	ND5	nonsyn	ti	protein coding	CAA	A>G	1	0	1
G136_Br	G126	G136	G136	mother	female	299	brain	CV	12048	T	C	2295	1	0.0004	somatic	ND5	nonsyn	ti	protein coding	ATT	T>C	1	0	1
G137p3_Br	G126	G137	G137p3	pup	female	17	brain	CV	12052	C	A	1025	1	0.001	somatic	ND5	nonsyn	tv	protein coding	TCT	C>A	1	0	1
G133p4_Oo_pool	G129	G133	G133p4	pup	female	19	oocyte pool	CV	12052	C	G	1852	1	0.0005	germline	ND5	nonsyn	tv	protein coding	TCT	C>G	0	1	1
G136_M	G126	G136	G136	mother	female	299	muscle	CV	12052	C	T	818	1	0.0012	somatic	ND5	nonsyn	ti	protein coding	TCT	C>T	1	0	1
G140_M	G126	G140	G140	mother	female	316	muscle	CV	12109	T	C	3502	1	0.0003	somatic	ND5	nonsyn	ti	protein coding	CTA	T>C	1	0	1
G140p1_M	G126	G140	G140p1	pup	male	21	muscle	CV	12115	T	C	4569	1	0.0002	somatic	ND5	nonsyn	ti	protein coding	CTG	T>C	1	0	1
G133p2_Br	G129	G133	G133p2	pup	male	19	brain	CV	12136	C	A	2420	1	0.0004	somatic	ND5	nonsyn	tv	protein coding	ACC	C>A	0	1	1
G140_Br	G126	G140	G140	mother	female	316	brain	CV	12139	C	T	3423	1	0.0003	somatic	ND5	nonsyn	ti	protein coding	TCA	C>T	1	0	1
G132_M	G129	G132	G132	mother	female	312	muscle	CV	12163	T	C	2772	1	0.0004	somatic	ND5	nonsyn	ti	protein coding	TTC	T>C	0	1	1
G133_M	G129	G133	G133	mother	female	308	muscle	CV	12172	G	T	2837	1	0.0004	somatic	ND5	nonsyn	tv	protein coding	TGA	G>T	0	1	1
G133p3_Oo1	G129	G133	G133p3	pup	female	19	single oocyte	FS	12174	G	T	28	1	0.0357	germline	ND5	nonsyn	tv	protein coding	AGA	G>T	0	1	1
G132p5_M	G129	G132	G132p5	pup	female	21	muscle	CV	12178	G	C	1935	1	0.0005	somatic	ND5	nonsyn	tv	protein coding	GGG	G>C	0	1	1
G132p3_M	G129	G132	G132p3	pup	female	19	muscle	CV	12178	G	T	1878	1	0.0005	somatic	ND5	nonsyn	tv	protein coding	GGG	G>T	0	1	1
G131_Br	G129	G131	G131	mother	female	291	brain	CV	12183	G	A	1983	1	0.0005	somatic	ND5	nonsyn	ti	protein coding	GGG	G>A	0	1	1
G132p6_Oo1	G129	G132	G132p6	pup	female	21	single oocyte	FS	12186	A	G	171	1	0.0059	germline	ND5	nonsyn	ti	protein coding	AAT	A>G	0	1	1
G131_Br	G129	G131	G131	mother	female	291	brain	CV	12192	T	A	1976	3	0.0015	somatic	ND5	nonsyn	tv	protein coding	ATC	T>A	0	1	1
G131p2_M	G129	G131	G131p2	pup	male	18	muscle	CV	12207	G	A	2276	1	0.0004	somatic	ND5	nonsyn	ti	protein coding	TGG	G>A	0	1	1
G140p1_Br	G126	G140	G140p1	pup	male	21	brain	CV	12208	G	T	4490	1	0.0002	somatic	ND5	nonsyn	tv	protein coding	GGA	G>T	1	0	1
G139_Br	G126	G139	G139	mother	female	316	brain	CV	12219	G	A	3389	1	0.0003	somatic	ND5	nonsyn	ti	protein coding	CGG	CpG>CpA	1	0	1
G140p7_M	G126	G140	G140p7	pup	female	21	muscle	CV	12232	C	A	2146	1	0.0005	somatic	ND5	nonsyn	tv	protein coding	GCA	C>A	1	0	1
G131p2_Br	G129	G131	G131p2	pup	male	18	brain	CV	12240	G	A	1662	3	0.0018	somatic	ND5	nonsyn	ti	protein coding	TGC	G>A	0	1	1
G140p7_M	G126	G140	G140p7	pup	female	21	muscle	CV	12256	T	C	2190	1	0.0005	somatic	ND5	nonsyn	ti	protein coding	ATC	T>C	1	0	1
G133p3_Br	G129	G133	G133p3	pup	female	19	brain	CV	12273	G	A	4134	1	0.0002	somatic	ND5	nonsyn	ti	protein coding	CGG	CpG>CpA	0	2	2
G132p6_M	G129	G132	G132p6	pup	female	21	muscle	CV	12273	G	A	1506	1	0.0007	somatic	ND5	nonsyn	ti	protein coding	CGG	CpG>CpA	0	2	2
G131_Oo3	G129	G131	G131	mother	female	291	single oocyte	FS	12283	G	A	230	5	0.0217	germline	ND5	nonsyn	ti	protein coding	GGA	G>A	0	2	2
G133_M	G129	G133	G133	mother	female	308	muscle	CV	12283	G	A	2507	1	0.0004	somatic	ND5	nonsyn	ti	protein coding	GGA	G>A	0	2	2
G137_M	G126	G137	G137	mother	female	320	muscle	CV	12289	T	C	2454	1	0.0004	somatic	ND5	nonsyn	ti	protein coding	ATT	T>C	1	0	1
G133_M	G129	G133	G133	mother	female	308	muscle	CV	12294	G	A	2438	1	0.0004	somatic	ND5	nonsyn	ti	protein coding	AGC	G>A	0	1	1
G131p2_Br	G129	G131	G131p2	pup	male	18	brain	CV	12294	G	T	1672	1	0.0006	somatic	ND5	nonsyn	tv	protein coding	AGC	G>T	0	1	1
G140_Br	G126	G140	G140	mother	female	316	brain	CV	12304	G	A	3080	1	0.0003	somatic	ND5	nonsyn	ti	protein coding	TGA	G>A	1	0	1
G131p3_Br	G129	G131	G131p3	pup	female	18	brain	CV	12330	G	A	2292	1	0.0004	somatic	ND5	nonsyn	ti	protein coding	AGA	G>A	0	1	1
G137_Br	G126	G137	G137	mother	female	320	brain	CV	12330	G	T	1442	1	0.0007	somatic	ND5	nonsyn	tv	protein coding	AGA	G>T	1	0	1
G133p4_M	G129	G133	G133p4	pup	female	19	muscle	CV	12341	G	A	3221	1	0.0003	somatic	ND5	syn	ti	protein coding	AGA	G>A	0	1	1
G140p7_Br	G126	G140	G140p7	pup	female	21	brain	CV	12345	A	T	1445	1	0.0007	somatic	ND5	nonsyn	tv	protein coding	TAT	A>T	1	0	1
G133_Oo1	G129	G133	G133	mother	female	308	single oocyte	FS	12363	G	A	957	1	0.001	germline	ND5	nonsyn	ti	protein coding	CGA	CpG>CpA	0	1	1
G133p3_M	G129	G133	G133p3	pup	female	19	muscle	CV	12365	C	A	3337	1	0.0003	somatic	ND5	nonsyn	tv	protein coding	ACA	C>A	0	1	1
G133_Br	G129	G133	G133	mother	female	308	brain	CV	12375	C	T	2029	1	0.0005	somatic	ND5	nonsyn	ti	protein coding	TCC	C>T	0	1	1
G133_Oo4	G129	G133	G133	mother	female	308	single oocyte	FS	12382	T	C	241	1	0.0042	germline	ND5	nonsyn	ti	protein coding	ATA	T>C	0	1	1
G132p7_Br	G129	G132	G132p7	pup	female	21	brain	CV	12384	G	A	4768	1	0.0002	somatic	ND5	nonsyn	ti	protein coding	AGG	G>A	0	1	1
G137p4_Br	G126	G137	G137p4	pup	male	18	brain	CV	12386	C	A	2380	1	0.0004	somatic	ND5	syn	tv	protein coding	GCC	C>A	1	0	1
G139_M	G126	G139	G139	mother	female	316	muscle	CV	12397	C	A	4364	1	0.0002	somatic	ND5	nonsyn	tv	protein coding	GCA	C>A	1	0	1
G133p3_M	G129	G133	G133p3	pup	female	19	muscle	CV	12406	G	A	3242	1	0.0003	somatic	ND5	nonsyn	ti	protein coding	GGA	G>A	0	1	1
G140_M	G126	G140	G140	mother	female	316	muscle	CV	12411	T	C	3155	1	0.0003	somatic	ND5	nonsyn	ti	protein coding	ATC	T>C	1	0	1
G134_M	G129	G134	G134	mother	female	295	muscle	CV	12412	C	A	930	1	0.0011	somatic	ND5	nonsyn	tv	protein coding	TCA	C>A	0	1	1
G140p6_Br	G126	G140	G140p6	pup	female	21	brain	CV	12436	G	A	4457	1	0.0002	somatic	ND5	nonsyn	ti	protein coding	TGA	G>A	1	0	1
G136_Oo_pool	G126	G136	G136	mother	female	299	oocyte pool	CV	12439	T	C	2651	3	0.0011	germline	ND5	nonsyn	ti	protein coding	CTA	T>C	1	0	1
G140p5_M	G126	G140	G140p5	pup	female	21	muscle	CV	12442	C	G	2664	1	0.0004	somatic	ND5	nonsyn	tv	protein coding	CCA	C>G	1	0	1
G140_Br	G126	G140	G140	mother	female	316	brain	CV	12448	C	T	3255	1	0.0003	somatic	ND5	nonsyn	ti	protein coding	GCA	C>T	1	0	1
G140p5_Br	G126	G140	G140p5	pup	female	21	brain	CV	12457	G	A	2194	1	0.0005	somatic	ND5	nonsyn	ti	protein coding	GGC	G>A	1	0	1
G132p6_Oo3	G129	G132	G132p6	pup	female	21	single oocyte	FS	12483	C	T	82	1	0.0122	germline	ND5	nonsyn	ti	protein coding	ACA	C>T	0	1	1
G132_M	G129	G132	G132	mother	female	312	muscle	CV	12501	G	A	2604	1	0.0004	somatic	ND5	nonsyn	ti	protein coding	AGT	G>A	0	1	1
G132p9_Oo_pool	G129	G132	G132p9	pup	female	21	oocyte pool	CV	12504	G	A	3222	2	0.0006	germline	ND5	nonsyn	ti	protein coding	TGC	G>A	0	1	1
G139_Br	G126	G139	G139	mother	female	316	brain	CV	12507	G	A	3448	1	0.0003	somatic	ND5	nonsyn	ti	protein coding	AGG	G>A	1	1	2
G131p3_M	G129	G131	G131p3	pup	female	18	muscle	CV	12507	G	A	3012	1	0.0003	somatic	ND5	nonsyn	ti	protein coding	AGG	G>A	1	1	2
G139_M	G126	G139	G139	mother	female	316	muscle	CV	12524	C	A	4477	1	0.0002	somatic	ND5	syn	tv	protein coding	TCC	C>A	1	0	1
G132p4_M	G129	G132	G132p4	pup	female	19	muscle	CV	12554	C	A	1189	1	0.0008	somatic	ND5	nonsyn	tv	protein coding	ACT	C>A	0	1	1
G140_M	G126	G140	G140	mother	female	316	muscle	CV	12576	T	A	3311	1	0.0003	somatic	ND5	nonsyn	tv	protein coding	TTG	T>A	1	0	1
G137p4_Br	G126	G137	G137p4	pup	male	18	brain	CV	12582	G	A	2331	1	0.0004	somatic	ND5	nonsyn	ti	protein coding	CGG	CpG>CpA	1	0	1
G132p3_Br	G129	G132	G132p3	pup	female	19	brain	CV	12585	G	A	1158	1	0.0009	somatic	ND5	nonsyn	ti	protein coding	AGC	G>A	0	1	1
G131_M	G129	G131	G131	mother	female	291	muscle	CV	12606	G	A	1341	1	0.0008	somatic	ND5	nonsyn	ti	protein coding	AGC	G>A	0	1	1
G139_Br	G126	G139	G139	mother	female	316	brain	CV	12607	C	A	3467	2	0.0006	somatic	ND5	nonsyn	tv	protein coding	GCT	C>A	1	0	1
G140p6_Br	G126	G140	G140p6	pup	female	21	brain	CV	12613	G	A	4526	1	0.0002	somatic	ND5	nonsyn	ti	protein coding	TGT	G>A	1	0	1
G137_Br	G126	G137	G137	mother	female	320	brain	CV	12630	G	A	1631	1	0.0006	somatic	ND5	nonsyn	ti	protein coding	CGA	CpG>CpA	1	0	1
G131_Br	G129	G131	G131	mother	female	291	brain	CV	12648	G	A	1980	1	0.0005	somatic	ND5	nonsyn	ti	protein coding	TGC	G>A	0	2	2
G132_Br	G129	G132	G132	mother	female	312	brain	CV	12648	G	A	855	1	0.0012	somatic	ND5	nonsyn	ti	protein coding	TGC	G>A	0	2	2
G131_M	G129	G131	G131	mother	female	291	muscle	CV	12653	C	A	1394	1	0.0007	somatic	ND5	nonsyn	tv	protein coding	TCT	C>A	1	1	2
G136_M	G126	G136	G136	mother	female	299	muscle	CV	12653	C	A	958	1	0.001	somatic	ND5	nonsyn	tv	protein coding	TCT	C>A	1	1	2
G137_M	G126	G137	G137	mother	female	320	muscle	CV	12677	G	A	2387	1	0.0004	somatic	ND5	syn	ti	protein coding	TGA	G>A	1	0	1
G137p1_M	G126	G137	G137p1	pup	male	17	muscle	CV	12681	A	G	983	2	0.002	somatic	ND5	nonsyn	ti	protein coding	AAT	A>G	1	0	1
G132p7_Br	G129	G132	G132p7	pup	female	21	brain	CV	12686	G	A	4788	1	0.0002	somatic	ND5	syn	ti	protein coding	TGA	G>A	0	2	2
G132_M	G129	G132	G132	mother	female	312	muscle	CV	12686	G	A	2701	1	0.0004	somatic	ND5	syn	ti	protein coding	TGA	G>A	0	2	2
G132p8_M	G129	G132	G132p8	pup	female	21	muscle	CV	12688	C	G	1689	1	0.0006	somatic	ND5	nonsyn	tv	protein coding	ACG	C>G	0	1	1
G133_M	G129	G133	G133	mother	female	308	muscle	CV	12689	G	A	2639	1	0.0004	somatic	ND5	syn	ti	protein coding	CGC	CpG>CpA	0	1	1
G132p2_Br	G129	G132	G132p2	pup	male	19	brain	CV	12698	A	G	2062	1	0.0005	somatic	ND5	syn	ti	protein coding	TAA	A>G	0	1	1
G133_Br	G129	G133	G133	mother	female	308	brain	CV	12714	G	A	2014	1	0.0005	somatic	ND5	nonsyn	ti	protein coding	AGC	G>A	0	1	1
G140p6_Br	G126	G140	G140p6	pup	female	21	brain	CV	12739	C	A	4734	1	0.0002	somatic	ND5	nonsyn	tv	protein coding	GCA	C>A	1	0	1
G132_Oo2	G129	G132	G132	mother	female	312	single oocyte	FS	12746	C	A	64	1	0.0156	germline	ND5	nonsyn	tv	protein coding	TCA	C>A	0	1	1
G140p6_Br	G126	G140	G140p6	pup	female	21	brain	CV	12750	G	A	4745	1	0.0002	somatic	ND5	nonsyn	ti	protein coding	AGC	G>A	2	0	2
G139_Oo4	G126	G139	G139	mother	female	316	single oocyte	FS	12750	G	A	1421	1	0.0007	germline	ND5	nonsyn	ti	protein coding	AGC	G>A	2	0	2
G132p8_Br	G129	G132	G132p8	pup	female	21	brain	CV	12766	G	C	2966	1	0.0003	somatic	ND5	nonsyn	tv	protein coding	TGC	G>C	0	1	1
G137p4_M	G126	G137	G137p4	pup	male	18	muscle	CV	12769	C	A	1006	1	0.001	somatic	ND5	nonsyn	tv	protein coding	TCT	C>A	1	0	1
G133_M	G129	G133	G133	mother	female	308	muscle	CV	12769	C	G	2702	1	0.0004	somatic	ND5	nonsyn	tv	protein coding	TCT	C>G	0	1	1
G133p3_Br	G129	G133	G133p3	pup	female	19	brain	CV	12774	T	C	4306	1	0.0002	somatic	ND5	nonsyn	ti	protein coding	CTC	T>C	0	1	1
G136_Oo6	G126	G136	G136	mother	female	299	single oocyte	FS	12775	C	A	976	1	0.001	germline	ND5	nonsyn	tv	protein coding	TCA	C>A	2	0	2
G140p6_Oo2	G126	G140	G140p6	pup	female	21	single oocyte	FS	12775	C	A	322	1	0.0031	germline	ND5	nonsyn	tv	protein coding	TCA	C>A	2	0	2
G133_M	G129	G133	G133	mother	female	308	muscle	CV	12785	T	C	2699	1	0.0004	somatic	ND5	syn	ti	protein coding	ATA	T>C	0	1	1
G132p3_Br	G129	G132	G132p3	pup	female	19	brain	CV	12787	G	A	1185	1	0.0008	somatic	ND5	nonsyn	ti	protein coding	AGC	G>A	0	1	1
G133_Oo4	G129	G133	G133	mother	female	308	single oocyte	FS	12795	G	A	236	1	0.0042	germline	ND5	nonsyn	ti	protein coding	AGA	G>A	0	1	1
G140p1_Br	G126	G140	G140p1	pup	male	21	brain	CV	12811	G	T	4550	1	0.0002	somatic	ND5	nonsyn	tv	protein coding	CGA	G>T	1	0	1
G134_M	G129	G134	G134	mother	female	295	muscle	CV	12820	G	A	908	1	0.0011	somatic	ND5	nonsyn	ti	protein coding	GGA	G>A	0	1	1
G137p1_Br	G126	G137	G137p1	pup	male	17	brain	CV	12833	A	T	2925	1	0.0003	somatic	ND5	nonsyn	tv	protein coding	AAA	A>T	1	0	1
G131p3_M	G129	G131	G131p3	pup	female	18	muscle	CV	12841	C	G	3126	1	0.0003	somatic	ND5	nonsyn	tv	protein coding	CCA	C>G	0	1	1
G132p9_M	G129	G132	G132p9	pup	female	21	muscle	CV	12850	C	A	1323	1	0.0008	somatic	ND5	nonsyn	tv	protein coding	TCA	C>A	0	1	1
G132_M	G129	G132	G132	mother	female	312	muscle	CV	12867	G	A	2825	1	0.0004	somatic	ND5	nonsyn	ti	protein coding	CGG	CpG>CpA	0	1	1
G137p3_M	G126	G137	G137p3	pup	female	17	muscle	CV	12867	G	C	1149	1	0.0009	somatic	ND5	nonsyn	tv	protein coding	CGG	G>C	1	0	1
G137p4_Br	G126	G137	G137p4	pup	male	18	brain	CV	12868	G	T	2470	1	0.0004	somatic	ND5	nonsyn	tv	protein coding	GGA	G>T	1	0	1
G139_M	G126	G139	G139	mother	female	316	muscle	CV	12871	G	A	4746	1	0.0002	somatic	ND5	nonsyn	ti	protein coding	AGC	G>A	1	0	1
G136_Oo4	G126	G136	G136	mother	female	299	single oocyte	FS	12886	G	A	68	1	0.0147	germline	ND5	nonsyn	ti	protein coding	GGA	G>A	1	0	1
G140p1_Br	G126	G140	G140p1	pup	male	21	brain	CV	12894	T	C	4566	1	0.0002	somatic	ND5	nonsyn	ti	protein coding	ATT	T>C	1	0	1
G131_Oo3	G129	G131	G131	mother	female	291	single oocyte	FS	12904	G	A	223	1	0.0045	germline	ND5	nonsyn	ti	protein coding	GGG	G>A	0	1	1
G140p5_M	G126	G140	G140p5	pup	female	21	muscle	CV	12933	G	T	2892	1	0.0004	somatic	ND5	nonsyn	tv	protein coding	AGC	G>T	1	0	1
G133p4_Oo_pool	G129	G133	G133p4	pup	female	19	oocyte pool	CV	12953	C	T	2300	1	0.0004	germline	ND5	syn	ti	protein coding	CCA	C>T	0	1	1
G136_Br	G126	G136	G136	mother	female	299	brain	CV	12958	C	T	2833	1	0.0004	somatic	ND5	nonsyn	ti	protein coding	GCC	C>T	1	0	1
G137_Oo1	G126	G137	G137	mother	female	320	single oocyte	CV	12962	A	G	24	1	0.0417	germline	ND5	syn	ti	protein coding	GAG	A>G	1	0	1
G132p7_Br	G129	G132	G132p7	pup	female	21	brain	CV	12963	G	A	4844	1	0.0002	somatic	ND5	nonsyn	ti	protein coding	AGC	G>A	1	1	2
G139p2_Br	G126	G139	G139p2	pup	female	18	brain	CV	12963	G	A	1402	1	0.0007	somatic	ND5	nonsyn	ti	protein coding	AGC	G>A	1	1	2
G139_Oo4	G126	G139	G139	mother	female	316	single oocyte	FS	12994	T	C	1278	2	0.0016	germline	ND5	nonsyn	ti	protein coding	ATA	T>C	1	0	1
G139_Oo2	G126	G139	G139	mother	female	316	single oocyte	FS	13012	T	C	542	3	0.0055	germline	ND5	nonsyn	ti	protein coding	ATA	T>C	2	0	2
G136_Oo4	G126	G136	G136	mother	female	299	single oocyte	FS	13012	T	C	50	2	0.04	germline	ND5	nonsyn	ti	protein coding	ATA	T>C	2	0	2
G137_Oo4	G126	G137	G137	mother	female	320	single oocyte	FS	13015	G	T	1502	1	0.0007	germline	ND5	nonsyn	tv	protein coding	CGA	G>T	1	0	1
G132p9_Oo_pool	G129	G132	G132p9	pup	female	21	oocyte pool	CV	13028	C	A	3367	1	0.0003	germline	ND5	nonsyn	tv	protein coding	TCG	C>A	0	1	1
G133p4_Br	G129	G133	G133p4	pup	female	19	brain	CV	13052	T	G	2367	1	0.0004	somatic	ND5	nonsyn	tv	protein coding	TTC	T>G	1	1	2
G137p4_Br	G126	G137	G137p4	pup	male	18	brain	CV	13052	T	G	2288	1	0.0004	somatic	ND5	nonsyn	tv	protein coding	TTC	T>G	1	1	2
G140p1_M	G126	G140	G140p1	pup	male	21	muscle	CV	13055	C	T	4297	2	0.0005	somatic	ND5	syn	ti	protein coding	CCC	C>T	1	0	1
G139_Br	G126	G139	G139	mother	female	316	brain	CV	13060	T	C	3685	1	0.0003	somatic	ND5	nonsyn	ti	protein coding	CTA	T>C	1	0	1
G133_Br	G129	G133	G133	mother	female	308	brain	CV	13074	G	A	2030	1	0.0005	somatic	ND5	nonsyn	ti	protein coding	CGA	CpG>CpA	0	1	1
G132p8_Br	G129	G132	G132p8	pup	female	21	brain	CV	13086	G	A	2744	1	0.0004	somatic	ND5	nonsyn	ti	protein coding	AGA	G>A	0	1	1
G137p1_Br	G126	G137	G137p1	pup	male	17	brain	CV	13103	C	A	2669	1	0.0004	somatic	ND5	nonsyn	tv	protein coding	TCA	C>A	1	0	1
G139_Br	G126	G139	G139	mother	female	316	brain	CV	13103	C	T	3733	1	0.0003	somatic	ND5	syn	ti	protein coding	TCA	C>T	1	0	1
G132p8_M	G129	G132	G132p8	pup	female	21	muscle	CV	13108	G	A	1616	1	0.0006	somatic	ND5	nonsyn	ti	protein coding	CGC	CpG>CpA	0	1	1
G139_Br	G126	G139	G139	mother	female	316	brain	CV	13119	G	A	3745	1	0.0003	somatic	ND5	nonsyn	ti	protein coding	CGG	CpG>CpA	1	0	1
G133p2_Br	G129	G133	G133p2	pup	male	19	brain	CV	13120	G	A	2202	1	0.0005	somatic	ND5	nonsyn	ti	protein coding	GGA	G>A	1	1	2
G136_Br	G126	G136	G136	mother	female	299	brain	CV	13120	G	A	2685	1	0.0004	somatic	ND5	nonsyn	ti	protein coding	GGA	G>A	1	1	2
G136_Br	G126	G136	G136	mother	female	299	brain	CV	13134	G	A	2598	1	0.0004	somatic	ND5	nonsyn	ti	protein coding	AGG	G>A	2	0	2
G137_M	G126	G137	G137	mother	female	320	muscle	CV	13134	G	A	2387	1	0.0004	somatic	ND5	nonsyn	ti	protein coding	AGG	G>A	2	0	2
G133p3_Br	G129	G133	G133p3	pup	female	19	brain	CV	13145	C	T	4125	3	0.0007	somatic	ND5	syn	ti	protein coding	TCT	C>T	0	1	1
G132_Oo1	G129	G132	G132	mother	female	312	single oocyte	FS	13150	A	G	352	1	0.0028	germline	ND5	nonsyn	ti	protein coding	TAT	A>G	0	1	1
G140p6_Br	G126	G140	G140p6	pup	female	21	brain	CV	13165	C	T	4346	1	0.0002	somatic	ND5	nonsyn	ti	protein coding	ACC	C>T	1	0	1
G132_M	G129	G132	G132	mother	female	312	muscle	CV	13168	G	A	2427	1	0.0004	somatic	ND5	nonsyn	ti	protein coding	AGC	G>A	1	1	2
G140_M	G126	G140	G140	mother	female	316	muscle	CV	13168	G	A	3183	1	0.0003	somatic	ND5	nonsyn	ti	protein coding	AGC	G>A	1	1	2
G133p4_Br	G129	G133	G133p4	pup	female	19	brain	CV	13176	G	A	2537	1	0.0004	somatic	ND5	nonsyn	ti	protein coding	AGT	G>A	0	1	1
G137p3_Oo_pool	G126	G137	G137p3	pup	female	17	oocyte pool	CV	13176	G	C	1239	1	0.0008	germline	ND5	nonsyn	tv	protein coding	AGT	G>C	1	0	1
G133p4_M	G129	G133	G133p4	pup	female	19	muscle	CV	13178	C	G	3496	1	0.0003	somatic	ND5	syn	tv	protein coding	TCC	C>G	0	1	1
G133_Br	G129	G133	G133	mother	female	308	brain	CV	13208	A	T	2042	1	0.0005	somatic	ND5	syn	tv	protein coding	CAG	A>T	0	1	1
G133p2_Br	G129	G133	G133p2	pup	male	19	brain	CV	13230	G	A	2085	1	0.0005	somatic	ND5	nonsyn	ti	protein coding	AGG	G>A	0	1	1
G132p8_Br	G129	G132	G132p8	pup	female	21	brain	CV	13231	G	A	2569	1	0.0004	somatic	ND5	nonsyn	ti	protein coding	GGA	G>A	0	1	1
G140_Br	G126	G140	G140	mother	female	316	brain	CV	13241	C	A	3187	1	0.0003	somatic	ND5	nonsyn	tv	protein coding	TCG	C>A	1	0	1
G140p7_Oo3	G126	G140	G140p7	pup	female	21	single oocyte	FS	13264	C	T	399	1	0.0025	germline	ND5	nonsyn	ti	protein coding	ACC	C>T	1	0	1
G140p7_Oo2	G126	G140	G140p7	pup	female	21	single oocyte	FS	13294	C	A	401	1	0.0025	germline	ND5	nonsyn	tv	protein coding	CCA	C>A	1	0	1
G140p1_Br	G126	G140	G140p1	pup	male	21	brain	CV	13296	T	C	4252	1	0.0002	somatic	ND5	nonsyn	ti	protein coding	ATA	T>C	1	0	1
G133p3_M	G129	G133	G133p3	pup	female	19	muscle	CV	13300	C	T	3913	2	0.0005	somatic	ND5	nonsyn	ti	protein coding	TCA	C>T	0	1	1
G131_M	G129	G131	G131	mother	female	291	muscle	CV	13320	G	A	1391	1	0.0007	somatic	ND5	nonsyn	ti	protein coding	GGG	G>A	0	1	1
G140p7_Br	G126	G140	G140p7	pup	female	21	brain	CV	13321	G	A	1431	1	0.0007	somatic	ND5	nonsyn	ti	protein coding	GGG	G>A	2	0	2
G136_Oo_pool	G126	G136	G136	mother	female	299	oocyte pool	CV	13321	G	A	2277	1	0.0004	germline	ND5	nonsyn	ti	protein coding	GGG	G>A	2	0	2
G140p6_Br	G126	G140	G140p6	pup	female	21	brain	CV	13322	G	A	4294	1	0.0002	somatic	ND5	syn	ti	protein coding	GGT	G>A	2	0	2
G140_M	G126	G140	G140	mother	female	316	muscle	CV	13322	G	A	3096	1	0.0003	somatic	ND5	syn	ti	protein coding	GGT	G>A	2	0	2
G134_Oo1	G129	G134	G134	mother	female	295	single oocyte	CV	13327	T	C	820	1	0.0012	germline	ND5	nonsyn	ti	protein coding	TTC	T>C	0	1	1
G133_M	G129	G133	G133	mother	female	308	muscle	CV	13333	C	G	2569	1	0.0004	somatic	ND5	nonsyn	tv	protein coding	TCT	C>G	0	1	1
G137_Oo4	G126	G137	G137	mother	female	320	single oocyte	FS	13345	G	A	1381	2	0.0015	germline	ND5	nonsyn	ti	protein coding	CGC	CpG>CpA	1	1	2
G132p2_M	G129	G132	G132p2	pup	male	19	muscle	CV	13345	G	A	2654	1	0.0004	somatic	ND5	nonsyn	ti	protein coding	CGC	CpG>CpA	1	1	2
G139_M	G126	G139	G139	mother	female	316	muscle	CV	13375	G	A	4426	1	0.0002	somatic	ND5	nonsyn	ti	protein coding	AGC	G>A	1	0	1
G132p5_Oo_pool	G129	G132	G132p5	pup	female	21	oocyte pool	CV	13386	T	C	1842	3	0.0016	germline	ND5	nonsyn	ti	protein coding	ATC	T>C	0	1	1
G131p2_M	G129	G131	G131p2	pup	male	18	muscle	CV	13388	C	T	2307	1	0.0004	somatic	ND5	syn	ti	protein coding	CCC	C>T	0	1	1
G133_Oo2	G129	G133	G133	mother	female	308	single oocyte	FS	13394	T	C	246	1	0.0041	germline	ND5	syn	ti	protein coding	CTC	T>C	0	1	1
G140_M	G126	G140	G140	mother	female	316	muscle	CV	13406	G	T	3137	1	0.0003	somatic	ND5	nonsyn	tv	protein coding	TGA	G>T	1	0	1
G140p6_M	G126	G140	G140p6	pup	female	21	muscle	CV	13424	C	A	1821	1	0.0006	somatic	ND5	syn	tv	protein coding	CCA	C>A	1	0	1
G136_Br	G126	G136	G136	mother	female	299	brain	CV	13441	C	A	2319	1	0.0004	somatic	ND5	nonsyn	tv	protein coding	TCA	C>A	1	0	1
G137p5_M	G126	G137	G137p5	pup	female	18	muscle	CV	13510	C	T	2896	1	0.0004	somatic	ND5	nonsyn	ti	protein coding	TCA	C>T	1	0	1
G140p1_M	G126	G140	G140p1	pup	male	21	muscle	CV	13514	C	A	3680	1	0.0003	somatic	ND5	nonsyn	tv	protein coding	TCC	C>A	1	0	1
G132p2_M	G129	G132	G132p2	pup	male	19	muscle	CV	13525	T	C	2698	1	0.0004	somatic	ND5	nonsyn	ti	protein coding	ATC	T>C	0	1	1
G136_Br	G126	G136	G136	mother	female	299	brain	CV	13529	C	A	2228	1	0.0005	somatic	ND5	nonsyn	tv	protein coding	TCT	C>A	1	0	1
G140p1_M	G126	G140	G140p1	pup	male	21	muscle	CV	13541	C	A	3526	1	0.0003	somatic	ND5	nonsyn	tv	protein coding	TCT	C>A	1	0	1
G139_Br	G126	G139	G139	mother	female	316	brain	CV	13547	C	G	3351	1	0.0003	somatic	ND5	nonsyn	tv	protein coding	ACT	C>G	1	0	1
G136_Br	G126	G136	G136	mother	female	299	brain	CV	13554	A	T	2195	1	0.0005	somatic	ND5	nonsyn	tv	protein coding	TAA	A>T	1	0	1
G132p7_Br	G129	G132	G132p7	pup	female	21	brain	CV	13563	T	C	4873	1	0.0002	somatic	ND5	nonsyn	ti	protein coding	GTA	T>C	0	1	1
G140p1_Br	G126	G140	G140p1	pup	male	21	brain	CV	13569	C	A	4178	1	0.0002	somatic	ND6	syn	tv	protein coding	TCG	C>A	1	0	1
G131_Oo3	G129	G131	G131	mother	female	291	single oocyte	FS	13583	A	G	167	1	0.006	germline	ND6	syn	ti	protein coding	AAT	A>G	0	1	1
G133_M	G129	G133	G133	mother	female	308	muscle	CV	13584	T	C	2602	1	0.0004	somatic	ND6	syn	ti	protein coding	ATA	T>C	0	1	1
G136_Br	G126	G136	G136	mother	female	299	brain	CV	13607	G	A	2173	1	0.0005	somatic	ND6	syn	ti	protein coding	AGC	G>A	1	0	1
G140p7_Oo_pool	G126	G140	G140p7	pup	female	21	oocyte pool	CV	13631	C	A	1132	1	0.0009	germline	ND6	syn	tv	protein coding	ACA	C>A	1	0	1
G132p8_M	G129	G132	G132p8	pup	female	21	muscle	CV	13643	G	A	1415	1	0.0007	somatic	ND6	syn	ti	protein coding	TGC	G>A	0	1	1
G136_Br	G126	G136	G136	mother	female	299	brain	CV	13646	G	A	2135	1	0.0005	somatic	ND6	syn	ti	protein coding	CGC	CpG>CpA	3	0	3
G139p1_Br	G126	G139	G139p1	pup	female	18	brain	CV	13646	G	A	1210	1	0.0008	somatic	ND6	syn	ti	protein coding	CGC	CpG>CpA	3	0	3
G137_M	G126	G137	G137	mother	female	320	muscle	CV	13646	G	A	2369	1	0.0004	somatic	ND6	syn	ti	protein coding	CGC	CpG>CpA	3	0	3
G136_Oo3	G126	G136	G136	mother	female	299	single oocyte	FS	13649	A	G	570	2	0.0035	germline	ND6	syn	ti	protein coding	TAC	A>G	1	0	1
G140p1_M	G126	G140	G140p1	pup	male	21	muscle	CV	13652	C	G	3191	1	0.0003	somatic	ND6	syn	tv	protein coding	CCC	C>G	1	0	1
G133_M	G129	G133	G133	mother	female	308	muscle	CV	13666	C	T	2507	1	0.0004	somatic	ND6	syn	ti	protein coding	CCA	C>T	0	1	1
G137p5_M	G126	G137	G137p5	pup	female	18	muscle	CV	13677	C	A	2838	1	0.0004	somatic	ND6	syn	tv	protein coding	CCA	C>A	1	0	1
G139_M	G126	G139	G139	mother	female	316	muscle	CV	13686	C	A	4150	1	0.0002	somatic	ND6	syn	tv	protein coding	TCA	C>A	1	0	1
G140p7_Br	G126	G140	G140p7	pup	female	21	brain	CV	13703	C	T	1341	1	0.0008	somatic	ND6	syn	ti	protein coding	CCA	C>T	1	0	1
G132p7_Br	G129	G132	G132p7	pup	female	21	brain	CV	13706	T	G	4657	1	0.0002	somatic	ND6	syn	tv	protein coding	ATC	T>G	0	1	1
G140_Oo2	G126	G140	G140	mother	female	316	single oocyte	FS	13714	A	G	1019	1	0.001	germline	ND6	syn	ti	protein coding	AAC	A>G	1	1	2
G134_Oo_pool	G129	G134	G134	mother	female	295	oocyte pool	CV	13714	A	G	197	1	0.0051	germline	ND6	syn	ti	protein coding	AAC	A>G	1	1	2
G136_M	G126	G136	G136	mother	female	299	muscle	CV	13722	G	A	863	1	0.0012	somatic	ND6	syn	ti	protein coding	AGA	G>A	1	0	1
G133p3_M	G129	G133	G133p3	pup	female	19	muscle	CV	13729	T	C	3896	1	0.0003	somatic	ND6	syn	ti	protein coding	TTA	T>C	0	1	1
G131p2_Br	G129	G131	G131p2	pup	male	18	brain	CV	13743	C	G	1561	1	0.0006	somatic	ND6	syn	tv	protein coding	TCA	C>G	0	1	1
G140p7_M	G126	G140	G140p7	pup	female	21	muscle	CV	13792	T	C	1960	1	0.0005	somatic	ND6	syn	ti	protein coding	ATA	T>C	1	0	1
G140_Oo3	G126	G140	G140	mother	female	316	single oocyte	FS	13795	T	C	666	19	0.0285	germline	ND6	syn	ti	protein coding	CTA	T>C	1	0	1
G137_M	G126	G137	G137	mother	female	320	muscle	CV	13816	G	A	2447	1	0.0004	somatic	ND6	syn	ti	protein coding	AGT	G>A	2	0	2
G140_M	G126	G140	G140	mother	female	316	muscle	CV	13816	G	A	3228	1	0.0003	somatic	ND6	syn	ti	protein coding	AGT	G>A	2	0	2
G133p3_Br	G129	G133	G133p3	pup	female	19	brain	CV	13820	G	A	3860	1	0.0003	somatic	ND6	syn	ti	protein coding	AGA	G>A	0	2	2
G133_M	G129	G133	G133	mother	female	308	muscle	CV	13820	G	A	2494	1	0.0004	somatic	ND6	syn	ti	protein coding	AGA	G>A	0	2	2
G133p4_M	G129	G133	G133p4	pup	female	19	muscle	CV	13822	T	C	3585	1	0.0003	somatic	ND6	syn	ti	protein coding	ATC	T>C	0	1	1
G132p7_Oo3	G129	G132	G132p7	pup	female	21	single oocyte	FS	13823	C	T	166	1	0.006	germline	ND6	syn	ti	protein coding	TCC	C>T	0	1	1
G133_M	G129	G133	G133	mother	female	308	muscle	CV	13837	A	G	2593	1	0.0004	somatic	ND6	syn	ti	protein coding	GAT	A>G	0	1	1
G140_Oo2	G126	G140	G140	mother	female	316	single oocyte	FS	13865	T	C	935	1	0.0011	germline	ND6	syn	ti	protein coding	ATA	T>C	1	0	1
G137_M	G126	G137	G137	mother	female	320	muscle	CV	13875	C	A	2549	1	0.0004	somatic	ND6	syn	tv	protein coding	ACA	C>A	1	0	1
G132p7_Br	G129	G132	G132p7	pup	female	21	brain	CV	13884	T	G	4738	1	0.0002	somatic	ND6	syn	tv	protein coding	ATC	T>G	1	2	3
G133p4_M	G129	G133	G133p4	pup	female	19	muscle	CV	13884	T	G	3557	1	0.0003	somatic	ND6	syn	tv	protein coding	ATC	T>G	1	2	3
G140p1_M	G126	G140	G140p1	pup	male	21	muscle	CV	13884	T	G	2597	1	0.0004	somatic	ND6	syn	tv	protein coding	ATC	T>G	1	2	3
G140p6_Br	G126	G140	G140p6	pup	female	21	brain	CV	13888	C	T	4411	1	0.0002	somatic	ND6	syn	ti	protein coding	CCC	C>T	1	0	1
G137_Oo4	G126	G137	G137	mother	female	320	single oocyte	FS	13890	C	A	1277	1	0.0008	germline	ND6	syn	tv	protein coding	CCT	C>A	1	0	1
G133_Oo2	G129	G133	G133	mother	female	308	single oocyte	FS	13921	A	G	281	1	0.0036	germline	ND6	syn	ti	protein coding	AAA	A>G	0	1	1
G139_Oo2	G126	G139	G139	mother	female	316	single oocyte	FS	13932	C	A	482	1	0.0021	germline	ND6	syn	tv	protein coding	CCA	C>A	1	0	1
G132p7_Br	G129	G132	G132p7	pup	female	21	brain	CV	13936	C	A	5322	1	0.0002	somatic	ND6	syn	tv	protein coding	ACC	C>A	0	1	1
G133_Oo1	G129	G133	G133	mother	female	308	single oocyte	FS	13984	A	G	878	4	0.0046	germline	ND6	syn	ti	protein coding	AAC	A>G	0	1	1
G133p2_Br	G129	G133	G133p2	pup	male	19	brain	CV	13997	G	A	2618	1	0.0004	somatic	ND6	syn	ti	protein coding	AGG	G>A	0	1	1
G137_M	G126	G137	G137	mother	female	320	muscle	CV	13998	G	A	2788	1	0.0004	somatic	ND6	syn	ti	protein coding	GGT	G>A	1	0	1
G139_M	G126	G139	G139	mother	female	316	muscle	CV	14000	G	A	4696	1	0.0002	somatic	ND6	syn	ti	protein coding	TGA	G>A	1	0	1
G133p1_M	G129	G133	G133p1	pup	male	19	muscle	CV	14000	G	T	1084	1	0.0009	somatic	ND6	syn	tv	protein coding	TGA	G>T	0	1	1
G133_M	G129	G133	G133	mother	female	308	muscle	CV	14004	G	A	2929	1	0.0003	somatic	ND6	syn	ti	protein coding	GGC	G>A	0	1	1
G137_M	G126	G137	G137	mother	female	320	muscle	CV	14012	G	A	2741	1	0.0004	somatic	ND6	syn	ti	protein coding	TGC	G>A	1	0	1
G137p4_M	G126	G137	G137p4	pup	male	18	muscle	CV	14014	T	C	1138	1	0.0009	somatic	ND6	syn	ti	protein coding	CTA	T>C	1	0	1
G136_Br	G126	G136	G136	mother	female	299	brain	CV	14018	C	T	2488	1	0.0004	somatic	ND6	syn	ti	protein coding	CCC	C>T	1	0	1
G136_Oo6	G126	G136	G136	mother	female	299	single oocyte	FS	14024	C	T	791	1	0.0013	germline	ND6	syn	ti	protein coding	ACA	C>T	1	0	1
G133p4_M	G129	G133	G133p4	pup	female	19	muscle	CV	14042	G	A	4605	3	0.0007	somatic	ND6	syn	ti	protein coding	TGA	G>A	0	1	1
G139_M	G126	G139	G139	mother	female	316	muscle	CV	14051	A	G	4757	1	0.0002	somatic	ND6	syn	ti	protein coding	AAC	A>G	1	0	1
G132p8_M	G129	G132	G132p8	pup	female	21	muscle	CV	14064	T	C	1756	1	0.0006	somatic	ND6	syn	ti	protein coding	TTA	T>C	0	1	1
G131p3_M	G129	G131	G131p3	pup	female	18	muscle	CV	14068	C	G	2903	1	0.0003	somatic	ND6	syn	tv	protein coding	TCA	C>G	0	1	1
G134p7_M	G129	G134	G134p7	pup	female	18	muscle	CV	14071	T	C	2967	1	0.0003	somatic	TrnE	-	ti	RNA	TTA	T>C	0	1	1
G133_Oo2	G129	G133	G133	mother	female	308	single oocyte	FS	14076	C	T	327	1	0.0031	germline	TrnE	-	ti	RNA	TCT	C>T	0	1	1
G137_M	G126	G137	G137	mother	female	320	muscle	CV	14095	G	A	2776	1	0.0004	somatic	TrnE	-	ti	RNA	CGA	CpG>CpA	2	1	3
G132p6_Oo2	G129	G132	G132p6	pup	female	21	single oocyte	FS	14095	G	A	366	1	0.0027	germline	TrnE	-	ti	RNA	CGA	CpG>CpA	2	1	3
G137_Oo2	G126	G137	G137	mother	female	320	single oocyte	FS	14095	G	A	797	1	0.0013	germline	TrnE	-	ti	RNA	CGA	CpG>CpA	2	1	3
G133_M	G129	G133	G133	mother	female	308	muscle	CV	14102	G	A	3161	1	0.0003	somatic	TrnE	-	ti	RNA	TGA	G>A	0	1	1
G132p4_Br	G129	G132	G132p4	pup	female	19	brain	CV	14118	G	A	2033	1	0.0005	somatic	TrnE	-	ti	RNA	CGT	CpG>CpA	1	1	2
G137_Oo2	G126	G137	G137	mother	female	320	single oocyte	FS	14118	G	A	795	1	0.0013	germline	TrnE	-	ti	RNA	CGT	CpG>CpA	1	1	2
G133p3_Br	G129	G133	G133p3	pup	female	19	brain	CV	14135	G	A	4822	1	0.0002	somatic	TrnE	-	ti	RNA	AGA	G>A	0	1	1
G132p7_Br	G129	G132	G132p7	pup	female	21	brain	CV	14135	G	T	5766	1	0.0002	somatic	TrnE	-	tv	RNA	AGA	G>T	0	1	1
G136_Oo6	G126	G136	G136	mother	female	299	single oocyte	FS	14139	C	A	824	12	0.0146	germline	TrnE	-	tv	RNA	ACA	C>A	1	0	1
G140p1_Br	G126	G140	G140p1	pup	male	21	brain	CV	14158	G	A	5067	2	0.0004	somatic	CYTB	nonsyn	ti	protein coding	CGA	CpG>CpA	1	0	1
G140p5_M	G126	G140	G140p5	pup	female	21	muscle	CV	14168	C	T	2866	1	0.0004	somatic	CYTB	syn	ti	protein coding	ACC	C>T	1	0	1
G137_Br	G126	G137	G137	mother	female	320	brain	CV	14183	T	C	1644	1	0.0006	somatic	CYTB	syn	ti	protein coding	TTA	T>C	1	0	1
G133p3_Br	G129	G133	G133p3	pup	female	19	brain	CV	14186	T	A	4820	1	0.0002	somatic	CYTB	nonsyn	tv	protein coding	TTA	T>A	0	1	1
G132_Br	G129	G132	G132	mother	female	312	brain	CV	14197	T	C	822	1	0.0012	somatic	CYTB	nonsyn	ti	protein coding	TTC	T>C	0	1	1
G140_M	G126	G140	G140	mother	female	316	muscle	CV	14202	G	C	3782	1	0.0003	somatic	CYTB	nonsyn	tv	protein coding	TGA	G>C	1	0	1
G140_Oo2	G126	G140	G140	mother	female	316	single oocyte	FS	14211	G	A	1090	1	0.0009	germline	CYTB	nonsyn	ti	protein coding	TGC	G>A	1	0	1
G140p7_Br	G126	G140	G140p7	pup	female	21	brain	CV	14214	C	A	1653	1	0.0006	somatic	CYTB	nonsyn	tv	protein coding	CCC	C>A	1	0	1
G140p1_M	G126	G140	G140p1	pup	male	21	muscle	CV	14215	C	A	4353	2	0.0005	somatic	CYTB	nonsyn	tv	protein coding	CCA	C>A	1	0	1
G131p1_Br	G129	G131	G131p1	pup	male	18	brain	CV	14227	C	A	993	1	0.001	somatic	CYTB	nonsyn	tv	protein coding	TCA	C>A	0	1	1
G139_Br	G126	G139	G139	mother	female	316	brain	CV	14227	C	T	4236	1	0.0002	somatic	CYTB	nonsyn	ti	protein coding	TCA	C>T	1	0	1
G133p3_Br	G129	G133	G133p3	pup	female	19	brain	CV	14230	C	T	4901	4	0.0008	somatic	CYTB	nonsyn	ti	protein coding	TCA	C>T	0	1	1
G132p9_M	G129	G132	G132p9	pup	female	21	muscle	CV	14236	G	T	1465	1	0.0007	somatic	CYTB	nonsyn	tv	protein coding	TGA	G>T	0	1	1
G137_Br	G126	G137	G137	mother	female	320	brain	CV	14238	A	G	1705	1	0.0006	somatic	CYTB	nonsyn	ti	protein coding	AAA	A>G	1	0	1
G132p7_Br	G129	G132	G132p7	pup	female	21	brain	CV	14243	T	C	5941	1	0.0002	somatic	CYTB	syn	ti	protein coding	TTG	T>C	0	1	1
G131_M	G129	G131	G131	mother	female	291	muscle	CV	14245	G	A	1619	1	0.0006	somatic	CYTB	nonsyn	ti	protein coding	GGG	G>A	0	1	1
G132p7_M	G129	G132	G132p7	pup	female	21	muscle	CV	14246	G	A	502	1	0.002	somatic	CYTB	syn	ti	protein coding	GGT	G>A	1	2	3
G133_M	G129	G133	G133	mother	female	308	muscle	CV	14246	G	A	3182	1	0.0003	somatic	CYTB	syn	ti	protein coding	GGT	G>A	1	2	3
G140_M	G126	G140	G140	mother	female	316	muscle	CV	14246	G	A	3854	1	0.0003	somatic	CYTB	syn	ti	protein coding	GGT	G>A	1	2	3
G131p1_M	G129	G131	G131p1	pup	male	18	muscle	CV	14253	C	A	1487	1	0.0007	somatic	CYTB	nonsyn	tv	protein coding	TCT	C>A	0	1	1
G139_M	G126	G139	G139	mother	female	316	muscle	CV	14257	G	A	5285	1	0.0002	somatic	CYTB	nonsyn	ti	protein coding	GGA	G>A	1	0	1
G140p1_Br	G126	G140	G140p1	pup	male	21	brain	CV	14257	G	T	4949	1	0.0002	somatic	CYTB	nonsyn	tv	protein coding	GGA	G>T	1	0	1
G134p7_M	G129	G134	G134p7	pup	female	18	muscle	CV	14263	G	A	2839	1	0.0004	somatic	CYTB	nonsyn	ti	protein coding	TGC	G>A	0	1	1
G131p2_Br	G129	G131	G131p2	pup	male	18	brain	CV	14286	G	A	1879	1	0.0005	somatic	CYTB	nonsyn	ti	protein coding	AGG	G>A	0	1	1
G132p4_M	G129	G132	G132p4	pup	female	19	muscle	CV	14306	C	T	1541	1	0.0007	somatic	CYTB	syn	ti	protein coding	ACT	C>T	0	1	1
G133p2_M	G129	G133	G133p2	pup	male	19	muscle	CV	14309	C	G	1054	1	0.001	somatic	CYTB	nonsyn	tv	protein coding	ACA	C>G	0	1	1
G137p2_Br	G126	G137	G137p2	pup	female	17	brain	CV	14314	C	T	3562	1	0.0003	somatic	CYTB	nonsyn	ti	protein coding	TCA	C>T	1	0	1
G137_Br	G126	G137	G137	mother	female	320	brain	CV	14316	G	A	1682	1	0.0006	somatic	CYTB	nonsyn	ti	protein coding	AGA	G>A	1	1	2
G133_Oo3	G129	G133	G133	mother	female	308	single oocyte	FS	14316	G	A	226	1	0.0044	germline	CYTB	nonsyn	ti	protein coding	AGA	G>A	1	1	2
G132_Br	G129	G132	G132	mother	female	312	brain	CV	14328	G	A	826	1	0.0012	somatic	CYTB	nonsyn	ti	protein coding	AGC	G>A	0	1	1
G137p2_Br	G126	G137	G137p2	pup	female	17	brain	CV	14329	C	G	3565	1	0.0003	somatic	CYTB	nonsyn	tv	protein coding	GCC	C>G	1	0	1
G140p6_Oo_pool	G126	G140	G140p6	pup	female	21	oocyte pool	CV	14354	T	C	1049	1	0.001	germline	CYTB	syn	ti	protein coding	GTC	T>C	1	0	1
G136_Br	G126	G136	G136	mother	female	299	brain	CV	14356	G	A	2663	1	0.0004	somatic	CYTB	nonsyn	ti	protein coding	CGA	CpG>CpA	1	0	1
G136_Br	G126	G136	G136	mother	female	299	brain	CV	14361	G	A	2654	1	0.0004	somatic	CYTB	nonsyn	ti	protein coding	CGT	CpG>CpA	1	0	1
G133p3_M	G129	G133	G133p3	pup	female	19	muscle	CV	14365	A	T	4347	1	0.0002	somatic	CYTB	nonsyn	tv	protein coding	AAT	A>T	0	1	1
G139_M	G126	G139	G139	mother	female	316	muscle	CV	14374	G	A	5078	1	0.0002	somatic	CYTB	nonsyn	ti	protein coding	TGA	G>A	1	0	1
G140_M	G126	G140	G140	mother	female	316	muscle	CV	14374	G	T	3717	1	0.0003	somatic	CYTB	nonsyn	tv	protein coding	TGA	G>T	1	0	1
G140p1_M	G126	G140	G140p1	pup	male	21	muscle	CV	14376	C	T	4540	1	0.0002	somatic	CYTB	syn	ti	protein coding	ACT	C>T	1	0	1
G139p1_M	G126	G139	G139p1	pup	female	18	muscle	CV	14383	G	A	2122	1	0.0005	somatic	CYTB	nonsyn	ti	protein coding	CGA	CpG>CpA	1	0	1
G134_Oo1	G129	G134	G134	mother	female	295	single oocyte	CV	14383	G	T	905	1	0.0011	germline	CYTB	nonsyn	tv	protein coding	CGA	G>T	0	1	1
G137p1_Br	G126	G137	G137p1	pup	male	17	brain	CV	14388	A	G	3458	1	0.0003	somatic	CYTB	nonsyn	ti	protein coding	TAT	A>G	1	0	1
G139_Br	G126	G139	G139	mother	female	316	brain	CV	14393	C	T	3988	1	0.0003	somatic	CYTB	syn	ti	protein coding	ACG	CpG>TpG	1	0	1
G139_Br	G126	G139	G139	mother	female	316	brain	CV	14400	G	A	3983	1	0.0003	somatic	CYTB	nonsyn	ti	protein coding	CGG	CpG>CpA	1	0	1
G133_Oo5	G129	G133	G133	mother	female	308	single oocyte	FS	14404	C	A	420	1	0.0024	germline	CYTB	nonsyn	tv	protein coding	GCC	C>A	0	1	1
G139_Br	G126	G139	G139	mother	female	316	brain	CV	14427	T	C	3883	1	0.0003	somatic	CYTB	nonsyn	ti	protein coding	ATT	T>C	1	0	1
G137p2_Oo4	G126	G137	G137p2	pup	female	17	single oocyte	FS	14429	C	A	413	1	0.0024	germline	CYTB	nonsyn	tv	protein coding	TCC	C>A	1	0	1
G131_Br	G129	G131	G131	mother	female	291	brain	CV	14440	G	A	2106	1	0.0005	somatic	CYTB	nonsyn	ti	protein coding	GGA	G>A	0	1	1
G131p3_Br	G129	G131	G131p3	pup	female	18	brain	CV	14440	G	T	2844	1	0.0004	somatic	CYTB	nonsyn	tv	protein coding	GGA	G>T	0	1	1
G140p1_Br	G126	G140	G140p1	pup	male	21	brain	CV	14442	C	A	4632	1	0.0002	somatic	CYTB	nonsyn	tv	protein coding	ACG	C>A	1	0	1
G132p7_Oo2	G129	G132	G132p7	pup	female	21	single oocyte	FS	14457	G	A	196	1	0.0051	germline	CYTB	nonsyn	ti	protein coding	TGG	G>A	0	1	1
G137p4_Br	G126	G137	G137p4	pup	male	18	brain	CV	14462	A	C	2743	1	0.0004	somatic	CYTB	syn	tv	protein coding	CAT	A>C	1	0	1
G133_M	G129	G133	G133	mother	female	308	muscle	CV	14482	G	A	2896	1	0.0004	somatic	CYTB	nonsyn	ti	protein coding	TGA	G>A	0	1	1
G137p5_M	G126	G137	G137p5	pup	female	18	muscle	CV	14490	G	A	3273	3	0.0009	somatic	CYTB	nonsyn	ti	protein coding	TGG	G>A	2	0	2
G140p5_M	G126	G140	G140p5	pup	female	21	muscle	CV	14490	G	A	2865	1	0.0004	somatic	CYTB	nonsyn	ti	protein coding	TGG	G>A	2	0	2
G137_Oo4	G126	G137	G137	mother	female	320	single oocyte	FS	14491	G	A	1531	1	0.0007	germline	CYTB	nonsyn	ti	protein coding	GGA	G>A	1	0	1
G137_Br	G126	G137	G137	mother	female	320	brain	CV	14493	G	A	1570	1	0.0006	somatic	CYTB	nonsyn	ti	protein coding	AGT	G>A	1	0	1
G140p6_Oo3	G126	G140	G140p6	pup	female	21	single oocyte	FS	14502	C	T	525	1	0.0019	germline	CYTB	syn	ti	protein coding	ACT	C>T	1	0	1
G132p3_Br	G129	G132	G132p3	pup	female	19	brain	CV	14505	T	C	1183	1	0.0009	somatic	CYTB	nonsyn	ti	protein coding	GTT	T>C	0	1	1
G134_Oo1	G129	G134	G134	mother	female	295	single oocyte	CV	14508	G	A	915	3	0.0033	germline	CYTB	nonsyn	ti	protein coding	CGC	CpG>CpA	0	1	1
G136_Oo_pool	G126	G136	G136	mother	female	299	oocyte pool	CV	14517	G	A	2590	1	0.0004	germline	CYTB	nonsyn	ti	protein coding	AGC	G>A	1	0	1
G133_M	G129	G133	G133	mother	female	308	muscle	CV	14538	G	A	2854	1	0.0004	somatic	CYTB	nonsyn	ti	protein coding	CGT	CpG>CpA	0	1	1
G134_M	G129	G134	G134	mother	female	295	muscle	CV	14548	G	A	858	1	0.0012	somatic	CYTB	nonsyn	ti	protein coding	TGA	G>A	0	1	1
G133_M	G129	G133	G133	mother	female	308	muscle	CV	14550	G	A	2842	1	0.0004	somatic	CYTB	nonsyn	ti	protein coding	AGG	G>A	0	1	1
G139p2_Br	G126	G139	G139p2	pup	female	18	brain	CV	14557	T	C	1265	1	0.0008	somatic	CYTB	nonsyn	ti	protein coding	ATA	T>C	1	0	1
G137p1_Br	G126	G137	G137p1	pup	male	17	brain	CV	14568	G	A	3110	1	0.0003	somatic	CYTB	nonsyn	ti	protein coding	AGG	G>A	1	0	1
G140_Br	G126	G140	G140	mother	female	316	brain	CV	14571	G	A	3050	1	0.0003	somatic	CYTB	nonsyn	ti	protein coding	TGC	G>A	2	1	3
G134_M	G129	G134	G134	mother	female	295	muscle	CV	14571	G	A	842	1	0.0012	somatic	CYTB	nonsyn	ti	protein coding	TGC	G>A	2	1	3
G140p5_M	G126	G140	G140p5	pup	female	21	muscle	CV	14571	G	A	2758	1	0.0004	somatic	CYTB	nonsyn	ti	protein coding	TGC	G>A	2	1	3
G140p6_Br	G126	G140	G140p6	pup	female	21	brain	CV	14577	G	A	4728	1	0.0002	somatic	CYTB	nonsyn	ti	protein coding	AGT	G>A	1	0	1
G139_M	G126	G139	G139	mother	female	316	muscle	CV	14613	G	T	4851	1	0.0002	somatic	CYTB	nonsyn	tv	protein coding	TGG	G>T	1	1	2
G133_Oo4	G129	G133	G133	mother	female	308	single oocyte	FS	14613	G	T	203	1	0.0049	germline	CYTB	nonsyn	tv	protein coding	TGG	G>T	1	1	2
G133_M	G129	G133	G133	mother	female	308	muscle	CV	14638	G	A	2871	1	0.0004	somatic	CYTB	nonsyn	ti	protein coding	TGA	G>A	0	1	1
G140_Br	G126	G140	G140	mother	female	316	brain	CV	14648	C	A	3107	1	0.0003	somatic	CYTB	nonsyn	tv	protein coding	TCT	C>A	1	0	1
G134_M	G129	G134	G134	mother	female	295	muscle	CV	14652	G	A	853	1	0.0012	somatic	CYTB	nonsyn	ti	protein coding	AGT	G>A	0	1	1
G132p6_Oo_pool	G129	G132	G132p6	pup	female	21	oocyte pool	CV	14655	G	A	2105	3	0.0014	germline	CYTB	nonsyn	ti	protein coding	AGA	G>A	0	1	1
G132p5_Oo_pool	G129	G132	G132p5	pup	female	21	oocyte pool	CV	14674	G	A	2186	2	0.0009	germline	CYTB	nonsyn	ti	protein coding	CGA	CpG>CpA	0	1	1
G132p6_M	G129	G132	G132p6	pup	female	21	muscle	CV	14681	C	T	1531	1	0.0007	somatic	CYTB	syn	ti	protein coding	TCG	CpG>TpG	0	1	1
G140_Br	G126	G140	G140	mother	female	316	brain	CV	14682	G	A	3027	1	0.0003	somatic	CYTB	nonsyn	ti	protein coding	CGC	CpG>CpA	1	0	1
G140_Oo2	G126	G140	G140	mother	female	316	single oocyte	FS	14699	A	G	1130	1	0.0009	germline	CYTB	syn	ti	protein coding	TAC	A>G	1	0	1
G132_M	G129	G132	G132	mother	female	312	muscle	CV	14703	T	C	2584	1	0.0004	somatic	CYTB	nonsyn	ti	protein coding	ATT	T>C	0	2	2
G134_M	G129	G134	G134	mother	female	295	muscle	CV	14703	T	C	835	1	0.0012	somatic	CYTB	nonsyn	ti	protein coding	ATT	T>C	0	2	2
G139p1_Br	G126	G139	G139p1	pup	female	18	brain	CV	14712	G	A	1329	1	0.0008	somatic	CYTB	nonsyn	ti	protein coding	CGC	CpG>CpA	1	0	1
G140p5_Br	G126	G140	G140p5	pup	female	21	brain	CV	14712	G	T	2398	1	0.0004	somatic	CYTB	nonsyn	tv	protein coding	CGC	G>T	1	0	1
G140_Br	G126	G140	G140	mother	female	316	brain	CV	14714	G	A	3008	1	0.0003	somatic	CYTB	syn	ti	protein coding	CGG	CpG>CpA	1	0	1
G137_Oo2	G126	G137	G137	mother	female	320	single oocyte	FS	14715	G	A	842	1	0.0012	germline	CYTB	nonsyn	ti	protein coding	GGC	G>A	1	0	1
G140p7_Br	G126	G140	G140p7	pup	female	21	brain	CV	14726	C	A	1434	1	0.0007	somatic	CYTB	nonsyn	tv	protein coding	TCG	C>A	1	0	1
G132p8_Oo_pool	G129	G132	G132p8	pup	female	21	oocyte pool	CV	14732	C	G	1107	1	0.0009	germline	CYTB	nonsyn	tv	protein coding	ACC	C>G	0	1	1
G139_Br	G126	G139	G139	mother	female	316	brain	CV	14737	T	C	3634	1	0.0003	somatic	CYTB	nonsyn	ti	protein coding	CTC	T>C	1	0	1
G134_Oo1	G129	G134	G134	mother	female	295	single oocyte	CV	14748	G	A	946	1	0.0011	germline	CYTB	nonsyn	ti	protein coding	CGA	CpG>CpA	0	1	1
G131_M	G129	G131	G131	mother	female	291	muscle	CV	14755	G	A	1477	1	0.0007	somatic	CYTB	nonsyn	ti	protein coding	GGA	G>A	0	1	1
G133p3_Oo3	G129	G133	G133p3	pup	female	19	single oocyte	FS	14755	G	T	158	1	0.0063	germline	CYTB	nonsyn	tv	protein coding	GGA	G>T	0	1	1
G137_Oo4	G126	G137	G137	mother	female	320	single oocyte	FS	14761	A	G	1572	1	0.0006	germline	CYTB	nonsyn	ti	protein coding	AAC	A>G	1	0	1
G131p3_M	G129	G131	G131p3	pup	female	18	muscle	CV	14762	C	G	2313	1	0.0004	somatic	CYTB	nonsyn	tv	protein coding	ACA	C>G	0	1	1
G134_M	G129	G134	G134	mother	female	295	muscle	CV	14779	A	G	797	1	0.0013	somatic	CYTB	nonsyn	ti	protein coding	AAC	A>G	0	1	1
G139_Br	G126	G139	G139	mother	female	316	brain	CV	14782	C	T	3684	1	0.0003	somatic	CYTB	nonsyn	ti	protein coding	TCA	C>T	1	0	1
G136_Br	G126	G136	G136	mother	female	299	brain	CV	14784	G	A	2358	1	0.0004	somatic	CYTB	nonsyn	ti	protein coding	AGA	G>A	1	0	1
G133_Br	G129	G133	G133	mother	female	308	brain	CV	14804	T	C	1799	1	0.0006	somatic	CYTB	syn	ti	protein coding	TTC	T>C	0	1	1
G137p2_Oo1	G126	G137	G137p2	pup	female	17	single oocyte	CV	14837	T	C	574	1	0.0017	germline	CYTB	syn	ti	protein coding	GTA	T>C	1	0	1
G132p8_Br	G129	G132	G132p8	pup	female	21	brain	CV	14840	C	A	2924	1	0.0003	somatic	CYTB	nonsyn	tv	protein coding	TCC	C>A	0	1	1
G140_Oo2	G126	G140	G140	mother	female	316	single oocyte	FS	14852	C	A	1169	7	0.006	germline	CYTB	nonsyn	tv	protein coding	TCT	C>A	1	0	1
G139_Br	G126	G139	G139	mother	female	316	brain	CV	14853	T	C	3772	1	0.0003	somatic	CYTB	syn	ti	protein coding	CTT	T>C	1	0	1
G137p1_M	G126	G137	G137p1	pup	male	17	muscle	CV	14859	C	A	977	1	0.001	somatic	CYTB	nonsyn	tv	protein coding	TCT	C>A	1	0	1
G133p4_M	G129	G133	G133p4	pup	female	19	muscle	CV	14861	C	A	3869	1	0.0003	somatic	CYTB	syn	tv	protein coding	TCA	C>A	0	1	1
G134_Oo1	G129	G134	G134	mother	female	295	single oocyte	CV	14863	T	C	890	1	0.0011	germline	CYTB	nonsyn	ti	protein coding	ATA	T>C	0	1	1
G131_Br	G129	G131	G131	mother	female	291	brain	CV	14868	C	G	2022	1	0.0005	somatic	CYTB	nonsyn	tv	protein coding	CCT	C>G	0	1	1
G133_Oo_pool	G129	G133	G133	mother	female	308	oocyte pool	CV	14871	G	T	1656	1	0.0006	germline	CYTB	nonsyn	tv	protein coding	AGT	G>T	0	1	1
G140_Oo2	G126	G140	G140	mother	female	316	single oocyte	FS	14874	T	C	1169	1	0.0009	germline	CYTB	syn	ti	protein coding	ATT	T>C	1	0	1
G140p6_M	G126	G140	G140p6	pup	female	21	muscle	CV	14888	C	A	2169	1	0.0005	somatic	CYTB	nonsyn	tv	protein coding	ACA	C>A	1	0	1
G132p7_Br	G129	G132	G132p7	pup	female	21	brain	CV	14896	G	A	5186	1	0.0002	somatic	CYTB	nonsyn	ti	protein coding	GGA	G>A	0	2	2
G133_M	G129	G133	G133	mother	female	308	muscle	CV	14896	G	A	3093	1	0.0003	somatic	CYTB	nonsyn	ti	protein coding	GGA	G>A	0	2	2
G137_Oo3	G126	G137	G137	mother	female	320	single oocyte	FS	14898	G	A	87	1	0.0115	germline	CYTB	nonsyn	ti	protein coding	AGA	G>A	1	0	1
G137p5_M	G126	G137	G137p5	pup	female	18	muscle	CV	14900	C	G	3273	1	0.0003	somatic	CYTB	nonsyn	tv	protein coding	ACC	C>G	1	0	1
G132_M	G129	G132	G132	mother	female	312	muscle	CV	14955	G	A	2702	1	0.0004	somatic	CYTB	nonsyn	ti	protein coding	CGA	CpG>CpA	1	1	2
G137_M	G126	G137	G137	mother	female	320	muscle	CV	14955	G	A	3031	1	0.0003	somatic	CYTB	nonsyn	ti	protein coding	CGA	CpG>CpA	1	1	2
G132p3_Br	G129	G132	G132p3	pup	female	19	brain	CV	14973	G	A	1246	1	0.0008	somatic	CYTB	nonsyn	ti	protein coding	TGC	G>A	1	1	2
G136_Br	G126	G136	G136	mother	female	299	brain	CV	14973	G	A	2434	1	0.0004	somatic	CYTB	nonsyn	ti	protein coding	TGC	G>A	1	1	2
G132p7_Br	G129	G132	G132p7	pup	female	21	brain	CV	14979	G	A	5302	1	0.0002	somatic	CYTB	nonsyn	ti	protein coding	CGC	CpG>CpA	0	1	1
G133p4_M	G129	G133	G133p4	pup	female	19	muscle	CV	14981	C	G	3904	1	0.0003	somatic	CYTB	syn	tv	protein coding	CCA	C>G	0	1	1
G136_Br	G126	G136	G136	mother	female	299	brain	CV	14984	T	C	2474	1	0.0004	somatic	CYTB	syn	ti	protein coding	TTC	T>C	1	0	1
G140p1_M	G126	G140	G140p1	pup	male	21	muscle	CV	14999	C	A	5263	1	0.0002	somatic	CYTB	syn	tv	protein coding	CCA	C>A	1	0	1
G140p6_Br	G126	G140	G140p6	pup	female	21	brain	CV	14999	C	T	4993	1	0.0002	somatic	CYTB	syn	ti	protein coding	CCA	C>T	1	0	1
G134p7_Br	G129	G134	G134p7	pup	female	18	brain	CV	15010	G	A	1023	1	0.001	somatic	CYTB	nonsyn	ti	protein coding	GGA	G>A	0	1	1
G132p5_Br	G129	G132	G132p5	pup	female	21	brain	CV	15012	G	A	301	1	0.0033	somatic	CYTB	nonsyn	ti	protein coding	AGG	G>A	0	1	1
G137_M	G126	G137	G137	mother	female	320	muscle	CV	15015	G	A	2974	1	0.0003	somatic	CYTB	nonsyn	ti	protein coding	TGT	G>A	1	0	1
G132p5_Oo_pool	G129	G132	G132p5	pup	female	21	oocyte pool	CV	15021	G	A	2101	3	0.0014	germline	CYTB	nonsyn	ti	protein coding	AGC	G>A	1	1	2
G139_M	G126	G139	G139	mother	female	316	muscle	CV	15021	G	A	4935	1	0.0002	somatic	CYTB	nonsyn	ti	protein coding	AGC	G>A	1	1	2
G133_Br	G129	G133	G133	mother	female	308	brain	CV	15022	C	T	1813	1	0.0006	somatic	CYTB	nonsyn	ti	protein coding	GCC	C>T	0	1	1
G134p7_M	G129	G134	G134p7	pup	female	18	muscle	CV	15038	C	A	2492	1	0.0004	somatic	CYTB	nonsyn	tv	protein coding	TCC	C>A	0	1	1
G131p2_M	G129	G131	G131p2	pup	male	18	muscle	CV	15045	T	C	2273	1	0.0004	somatic	CYTB	syn	ti	protein coding	TTT	T>C	0	1	1
G133_M	G129	G133	G133	mother	female	308	muscle	CV	15048	G	A	3002	1	0.0003	somatic	CYTB	nonsyn	ti	protein coding	AGC	G>A	0	1	1
G139p2_M	G126	G139	G139p2	pup	female	18	muscle	CV	15049	C	G	1453	1	0.0007	somatic	CYTB	nonsyn	tv	protein coding	GCC	C>G	1	0	1
G139_Br	G126	G139	G139	mother	female	316	brain	CV	15049	C	T	3634	1	0.0003	somatic	CYTB	nonsyn	ti	protein coding	GCC	C>T	1	0	1
G132p2_Br	G129	G132	G132p2	pup	male	19	brain	CV	15054	A	G	2359	1	0.0004	somatic	CYTB	nonsyn	ti	protein coding	AAT	A>G	0	1	1
G136_Br	G126	G136	G136	mother	female	299	brain	CV	15056	A	T	2490	1	0.0004	somatic	CYTB	nonsyn	tv	protein coding	TAC	A>T	1	0	1
G131_M	G129	G131	G131	mother	female	291	muscle	CV	15060	T	C	1484	1	0.0007	somatic	CYTB	nonsyn	ti	protein coding	TTT	T>C	0	1	1
G132_M	G129	G132	G132	mother	female	312	muscle	CV	15065	T	C	2581	1	0.0004	somatic	CYTB	syn	ti	protein coding	TTC	T>C	0	1	1
G133_Oo1	G129	G133	G133	mother	female	308	single oocyte	FS	15078	C	A	948	1	0.0011	germline	CYTB	nonsyn	tv	protein coding	GCA	C>A	0	1	1
G137p2_Oo3	G126	G137	G137p2	pup	female	17	single oocyte	FS	15085	G	T	402	1	0.0025	germline	CYTB	nonsyn	tv	protein coding	AGC	G>T	1	0	1
G132p7_Br	G129	G132	G132p7	pup	female	21	brain	CV	15095	C	A	5301	1	0.0002	somatic	CYTB	nonsyn	tv	protein coding	TCC	C>A	0	1	1
G132p7_Br	G129	G132	G132p7	pup	female	21	brain	CV	15097	G	A	5244	1	0.0002	somatic	CYTB	nonsyn	ti	protein coding	CGC	CpG>CpA	0	2	2
G133_Oo1	G129	G133	G133	mother	female	308	single oocyte	FS	15097	G	A	964	1	0.001	germline	CYTB	nonsyn	ti	protein coding	CGC	CpG>CpA	0	2	2
G131p3_M	G129	G131	G131p3	pup	female	18	muscle	CV	15103	T	C	2551	1	0.0004	somatic	CYTB	nonsyn	ti	protein coding	ATC	T>C	0	1	1
G133_M	G129	G133	G133	mother	female	308	muscle	CV	15115	T	C	3101	1	0.0003	somatic	CYTB	nonsyn	ti	protein coding	TTG	T>C	0	1	1
G132p6_Oo_pool	G129	G132	G132p6	pup	female	21	oocyte pool	CV	15119	C	A	2019	1	0.0005	germline	CYTB	nonsyn	tv	protein coding	ACT	C>A	0	1	1
G134_Oo1	G129	G134	G134	mother	female	295	single oocyte	CV	15137	C	T	876	1	0.0011	germline	CYTB	syn	ti	protein coding	ACC	C>T	0	1	1
G137p5_M	G126	G137	G137p5	pup	female	18	muscle	CV	15141	C	A	3229	1	0.0003	somatic	CYTB	nonsyn	tv	protein coding	ACT	C>A	1	0	1
G132p9_M	G129	G132	G132p9	pup	female	21	muscle	CV	15148	T	C	1156	1	0.0009	somatic	CYTB	nonsyn	ti	protein coding	TTA	T>C	0	1	1
G133_Oo1	G129	G133	G133	mother	female	308	single oocyte	FS	15150	A	G	951	1	0.0011	germline	CYTB	nonsyn	ti	protein coding	AAC	A>G	0	1	1
G139_Br	G126	G139	G139	mother	female	316	brain	CV	15154	G	A	3858	1	0.0003	somatic	CYTB	nonsyn	ti	protein coding	TGA	G>A	1	0	1
G133p2_M	G129	G133	G133p2	pup	male	19	muscle	CV	15160	G	A	859	1	0.0012	somatic	CYTB	nonsyn	ti	protein coding	GGG	G>A	0	1	1
G132_M	G129	G132	G132	mother	female	312	muscle	CV	15162	G	A	2566	1	0.0004	somatic	CYTB	nonsyn	ti	protein coding	GGG	G>A	0	1	1
G140_Br	G126	G140	G140	mother	female	316	brain	CV	15163	G	A	3267	1	0.0003	somatic	CYTB	nonsyn	ti	protein coding	GGC	G>A	2	0	2
G136_M	G126	G136	G136	mother	female	299	muscle	CV	15163	G	A	803	1	0.0013	somatic	CYTB	nonsyn	ti	protein coding	GGC	G>A	2	0	2
G137p4_M	G126	G137	G137p4	pup	male	18	muscle	CV	15194	T	G	1239	1	0.0008	somatic	CYTB	nonsyn	tv	protein coding	TTG	T>G	1	0	1
G137p2_Br	G126	G137	G137p2	pup	female	17	brain	CV	15196	G	A	3536	1	0.0003	somatic	CYTB	nonsyn	ti	protein coding	GGC	G>A	1	0	1
G134_Oo1	G129	G134	G134	mother	female	295	single oocyte	CV	15204	G	A	866	1	0.0012	germline	CYTB	nonsyn	ti	protein coding	AGC	G>A	0	1	1
G137p5_Br	G126	G137	G137p5	pup	female	18	brain	CV	15231	T	C	3098	1	0.0003	somatic	CYTB	syn	ti	protein coding	CTT	T>C	1	0	1
G132p6_M	G129	G132	G132p6	pup	female	21	muscle	CV	15243	C	T	1533	1	0.0007	somatic	CYTB	nonsyn	ti	protein coding	ACC	C>T	0	1	1
G137p3_Oo5	G126	G137	G137p3	pup	female	17	single oocyte	FS	15244	C	A	441	1	0.0023	germline	CYTB	nonsyn	tv	protein coding	CCA	C>A	1	0	1
G140p1_Br	G126	G140	G140p1	pup	male	21	brain	CV	15264	G	A	4547	1	0.0002	somatic	CYTB	nonsyn	ti	protein coding	AGA	G>A	1	0	1
G137p5_M	G126	G137	G137p5	pup	female	18	muscle	CV	15266	C	T	3252	1	0.0003	somatic	CYTB	syn	ti	protein coding	ACA	C>T	1	0	1
G132p7_Br	G129	G132	G132p7	pup	female	21	brain	CV	15282	T	C	5494	1	0.0002	somatic	CYTB	nonsyn	ti	protein coding	ATA	T>C	0	1	1
G132p2_M	G129	G132	G132p2	pup	male	19	muscle	CV	15285	C	A	2957	2	0.0007	somatic	CYTB	nonsyn	tv	protein coding	TCC	C>A	0	1	1
G137_M	G126	G137	G137	mother	female	320	muscle	CV	15290	T	C	2866	2	0.0007	somatic	TrnT	-	ti	RNA	GTC	T>C	1	0	1
G131_Br	G129	G131	G131	mother	female	291	brain	CV	15296	T	C	2075	1	0.0005	somatic	TrnT	-	ti	RNA	ATA	T>C	0	1	1
G133p3_M	G129	G133	G133p3	pup	female	19	muscle	CV	15298	G	A	4587	2	0.0004	somatic	TrnT	-	ti	RNA	AGT	G>A	0	2	2
G133_M	G129	G133	G133	mother	female	308	muscle	CV	15298	G	A	3222	1	0.0003	somatic	TrnT	-	ti	RNA	AGT	G>A	0	2	2
G140p6_Oo2	G126	G140	G140p6	pup	female	21	single oocyte	FS	15314	G	A	283	1	0.0035	germline	TrnT	-	ti	RNA	TGG	G>A	1	0	1
G134_Oo1	G129	G134	G134	mother	female	295	single oocyte	CV	15320	G	A	828	1	0.0012	germline	TrnT	-	ti	RNA	TGT	G>A	0	2	2
G134_Oo_pool	G129	G134	G134	mother	female	295	oocyte pool	CV	15320	G	A	244	1	0.0041	germline	TrnT	-	ti	RNA	TGT	G>A	0	2	2
G132_Oo3	G129	G132	G132	mother	female	312	single oocyte	FS	15323	A	G	275	1	0.0036	germline	TrnT	-	ti	RNA	AAA	A>G	0	1	1
G131_Br	G129	G131	G131	mother	female	291	brain	CV	15327	T	C	2072	1	0.0005	somatic	TrnT	-	ti	RNA	CTG	T>C	0	1	1
G139_M	G126	G139	G139	mother	female	316	muscle	CV	15328	G	A	4894	1	0.0002	somatic	TrnT	-	ti	RNA	TGA	G>A	1	0	1
G137p2_Br	G126	G137	G137p2	pup	female	17	brain	CV	15360	G	A	3703	1	0.0003	somatic	TrnP	-	ti	RNA	AGA	G>A	1	0	1
G132p1_Br	G129	G132	G132p1	pup	male	19	brain	CV	15369	G	A	1566	1	0.0006	somatic	TrnP	-	ti	RNA	AGC	G>A	0	2	2
G132p2_Br	G129	G132	G132p2	pup	male	19	brain	CV	15369	G	A	2485	1	0.0004	somatic	TrnP	-	ti	RNA	AGC	G>A	0	2	2
G133p1_Br	G129	G133	G133p1	pup	male	19	brain	CV	15378	C	T	698	1	0.0014	somatic	TrnP	-	ti	RNA	CCA	C>T	0	1	1
G133_Br	G129	G133	G133	mother	female	308	brain	CV	15380	C	T	1912	1	0.0005	somatic	TrnP	-	ti	RNA	ACC	C>T	0	1	1
G134_Oo1	G129	G134	G134	mother	female	295	single oocyte	CV	15384	C	A	840	1	0.0012	germline	TrnP	-	tv	RNA	CCA	C>A	0	1	1
G140p5_Br	G126	G140	G140p5	pup	female	21	brain	CV	15386	G	A	2679	1	0.0004	somatic	TrnP	-	ti	RNA	AGC	G>A	1	0	1
G132p1_M	G129	G132	G132p1	pup	male	19	muscle	CV	15397	T	C	1598	1	0.0006	somatic	TrnP	-	ti	RNA	CTG	T>C	0	2	2
G133p3_M	G129	G133	G133p3	pup	female	19	muscle	CV	15397	T	C	4779	1	0.0002	somatic	TrnP	-	ti	RNA	CTG	T>C	0	2	2
G134p7_Br	G129	G134	G134p7	pup	female	18	brain	CV	15398	G	T	1067	1	0.0009	somatic	TrnP	-	tv	RNA	TGG	G>T	0	1	1
G139_M	G126	G139	G139	mother	female	316	muscle	CV	15399	G	A	5107	1	0.0002	somatic	TrnP	-	ti	RNA	GGT	G>A	1	0	1
G132p4_Br	G129	G132	G132p4	pup	female	19	brain	CV	15433	T	C	1924	1	0.0005	somatic	D-loop	-	ti	D-loop	ATT	T>C	0	1	1
G139_Br	G126	G139	G139	mother	female	316	brain	CV	15437	C	T	4222	1	0.0002	somatic	D-loop	-	ti	D-loop	ACA	C>T	1	0	1
G140p1_Br	G126	G140	G140p1	pup	male	21	brain	CV	15439	T	C	4852	1	0.0002	somatic	D-loop	-	ti	D-loop	ATA	T>C	2	0	2
G139_M	G126	G139	G139	mother	female	316	muscle	CV	15439	T	C	5121	1	0.0002	somatic	D-loop	-	ti	D-loop	ATA	T>C	2	0	2
G132p8_Oo2	G129	G132	G132p8	pup	female	21	single oocyte	FS	15447	C	T	113	1	0.0089	germline	D-loop	-	ti	D-loop	ACA	C>T	1	1	2
G139_Oo4	G126	G139	G139	mother	female	316	single oocyte	FS	15447	C	T	1255	1	0.0008	germline	D-loop	-	ti	D-loop	ACA	C>T	1	1	2
G136_Br	G126	G136	G136	mother	female	299	brain	CV	15462	T	C	2392	1	0.0004	somatic	D-loop	-	ti	D-loop	ATA	T>C	3	0	3
G137_Oo3	G126	G137	G137	mother	female	320	single oocyte	FS	15462	T	C	64	1	0.0156	germline	D-loop	-	ti	D-loop	ATA	T>C	3	0	3
G136_Oo_pool	G126	G136	G136	mother	female	299	oocyte pool	CV	15462	T	C	2218	1	0.0005	germline	D-loop	-	ti	D-loop	ATA	T>C	3	0	3
G133_Br	G129	G133	G133	mother	female	308	brain	CV	15474	A	G	1812	1	0.0006	somatic	D-loop	-	ti	D-loop	AAA	A>G	0	1	1
G139_Br	G126	G139	G139	mother	female	316	brain	CV	15480	T	C	4208	1	0.0002	somatic	D-loop	-	ti	D-loop	TTT	T>C	1	0	1
G137p4_Br	G126	G137	G137p4	pup	male	18	brain	CV	15485	C	T	2911	3	0.001	somatic	D-loop	-	ti	D-loop	CCC	C>T	1	0	1
G133p4_Oo_pool	G129	G133	G133p4	pup	female	19	oocyte pool	CV	15486	C	A	1764	1	0.0006	germline	D-loop	-	tv	D-loop	CCA	C>A	0	1	1
G133_Oo_pool	G129	G133	G133	mother	female	308	oocyte pool	CV	15493	A	G	1508	1	0.0007	germline	D-loop	-	ti	D-loop	TAT	A>G	0	1	1
G133p3_Br	G129	G133	G133p3	pup	female	19	brain	CV	15499	T	C	4635	1	0.0002	somatic	D-loop	-	ti	D-loop	CTA	T>C	1	1	2
G139_Oo3	G126	G139	G139	mother	female	316	single oocyte	FS	15499	T	C	1156	1	0.0009	germline	D-loop	-	ti	D-loop	CTA	T>C	1	1	2
G132p5_M	G129	G132	G132p5	pup	female	21	muscle	CV	15504	C	A	2080	1	0.0005	somatic	D-loop	-	tv	D-loop	ACA	C>A	0	1	1
G139_M	G126	G139	G139	mother	female	316	muscle	CV	15504	C	T	4979	1	0.0002	somatic	D-loop	-	ti	D-loop	ACA	C>T	1	0	1
G133_M	G129	G133	G133	mother	female	308	muscle	CV	15508	A	G	3240	1	0.0003	somatic	D-loop	-	ti	D-loop	TAA	A>G	0	1	1
G132p6_Br	G129	G132	G132p6	pup	female	21	brain	CV	15514	A	G	835	1	0.0012	somatic	D-loop	-	ti	D-loop	AAT	A>G	0	1	1
G137p3_Oo3	G126	G137	G137p3	pup	female	17	single oocyte	FS	15516	G	A	773	1	0.0013	germline	D-loop	-	ti	D-loop	TGG	G>A	1	0	1
G133p2_M	G129	G133	G133p2	pup	male	19	muscle	CV	15519	T	C	966	2	0.0021	somatic	D-loop	-	ti	D-loop	TTC	T>C	1	1	2
G140_M	G126	G140	G140	mother	female	316	muscle	CV	15519	T	C	3629	1	0.0003	somatic	D-loop	-	ti	D-loop	TTC	T>C	1	1	2
G132p3_Br	G129	G132	G132p3	pup	female	19	brain	CV	15520	C	T	1224	1	0.0008	somatic	D-loop	-	ti	D-loop	TCA	C>T	0	1	1
G131p2_Br	G129	G131	G131p2	pup	male	18	brain	CV	15522	G	A	1808	1	0.0006	somatic	D-loop	-	ti	D-loop	AGG	G>A	0	1	1
G131p2_M	G129	G131	G131p2	pup	male	18	muscle	CV	15523	G	A	2319	1	0.0004	somatic	D-loop	-	ti	D-loop	GGT	G>A	0	1	1
G132_M	G129	G132	G132	mother	female	312	muscle	CV	15524	T	C	3133	2	0.0006	somatic	D-loop	-	ti	D-loop	GTC	T>C	1	1	2
G137p3_Br	G126	G137	G137p3	pup	female	17	brain	CV	15524	T	C	1072	1	0.0009	somatic	D-loop	-	ti	D-loop	GTC	T>C	1	1	2
G133p3_M	G129	G133	G133p3	pup	female	19	muscle	CV	15528	A	G	4554	3	0.0007	somatic	D-loop	-	ti	D-loop	TAA	A>G	0	2	2
G133p3_Oo_pool	G129	G133	G133p3	pup	female	19	oocyte pool	CV	15528	A	G	742	1	0.0014	germline	D-loop	-	ti	D-loop	TAA	A>G	0	2	2
G132_M	G129	G132	G132	mother	female	312	muscle	CV	15532	T	C	3138	1	0.0003	somatic	D-loop	-	ti	D-loop	ATA	T>C	0	1	1
G133_Br	G129	G133	G133	mother	female	308	brain	CV	15535	T	C	1758	1	0.0006	somatic	D-loop	-	ti	D-loop	ATC	T>C	0	1	1
G134p7_M	G129	G134	G134p7	pup	female	18	muscle	CV	15536	C	T	2124	1	0.0005	somatic	D-loop	-	ti	D-loop	TCA	C>T	2	1	3
G137_M	G126	G137	G137	mother	female	320	muscle	CV	15536	C	T	2933	1	0.0003	somatic	D-loop	-	ti	D-loop	TCA	C>T	2	1	3
G137_Oo1	G126	G137	G137	mother	female	320	single oocyte	CV	15536	C	T	22	1	0.0455	germline	D-loop	-	ti	D-loop	TCA	C>T	2	1	3
G131p2_M	G129	G131	G131p2	pup	male	18	muscle	CV	15537	A	G	2346	1	0.0004	somatic	D-loop	-	ti	D-loop	CAT	A>G	0	1	1
G133p3_Br	G129	G133	G133p3	pup	female	19	brain	CV	15539	C	A	4592	1	0.0002	somatic	D-loop	-	tv	D-loop	TCA	C>A	0	1	1
G137_Br	G126	G137	G137	mother	female	320	brain	CV	15539	C	T	1626	1	0.0006	somatic	D-loop	-	ti	D-loop	TCA	C>T	1	1	2
G131_M	G129	G131	G131	mother	female	291	muscle	CV	15539	C	T	1478	1	0.0007	somatic	D-loop	-	ti	D-loop	TCA	C>T	1	1	2
G133_Br	G129	G133	G133	mother	female	308	brain	CV	15542	C	T	1755	1	0.0006	somatic	D-loop	-	ti	D-loop	ACA	C>T	0	1	1
G133p3_Br	G129	G133	G133p3	pup	female	19	brain	CV	15552	T	C	4554	2	0.0004	somatic	D-loop	-	ti	D-loop	ATA	T>C	0	2	2
G133_M	G129	G133	G133	mother	female	308	muscle	CV	15552	T	C	3116	1	0.0003	somatic	D-loop	-	ti	D-loop	ATA	T>C	0	2	2
G136_Br	G126	G136	G136	mother	female	299	brain	CV	15560	C	T	2398	1	0.0004	somatic	D-loop	-	ti	D-loop	ACC	C>T	2	0	2
G137p3_Br	G126	G137	G137p3	pup	female	17	brain	CV	15560	C	T	1064	1	0.0009	somatic	D-loop	-	ti	D-loop	ACC	C>T	2	0	2
G137_Br	G126	G137	G137	mother	female	320	brain	CV	15561	C	T	1634	1	0.0006	somatic	D-loop	-	ti	D-loop	CCA	C>T	2	0	2
G136_M	G126	G136	G136	mother	female	299	muscle	CV	15561	C	T	759	1	0.0013	somatic	D-loop	-	ti	D-loop	CCA	C>T	2	0	2
G136_Br	G126	G136	G136	mother	female	299	brain	CV	15564	G	A	2405	1	0.0004	somatic	D-loop	-	ti	D-loop	TGA	G>A	2	1	3
G132_M	G129	G132	G132	mother	female	312	muscle	CV	15564	G	A	3208	1	0.0003	somatic	D-loop	-	ti	D-loop	TGA	G>A	2	1	3
G137_M	G126	G137	G137	mother	female	320	muscle	CV	15564	G	A	2808	1	0.0004	somatic	D-loop	-	ti	D-loop	TGA	G>A	2	1	3
G132p7_Oo_pool	G129	G132	G132p7	pup	female	21	oocyte pool	CV	15566	A	G	1306	4	0.0031	germline	D-loop	-	ti	D-loop	AAT	A>G	1	1	2
G136_Br	G126	G136	G136	mother	female	299	brain	CV	15566	A	G	2412	1	0.0004	somatic	D-loop	-	ti	D-loop	AAT	A>G	1	1	2
G140_M	G126	G140	G140	mother	female	316	muscle	CV	15573	C	T	3641	1	0.0003	somatic	D-loop	-	ti	D-loop	TCT	C>T	1	0	1
G137_M	G126	G137	G137	mother	female	320	muscle	CV	15575	T	C	2813	1	0.0004	somatic	D-loop	-	ti	D-loop	TTA	T>C	1	0	1
G132_M	G129	G132	G132	mother	female	312	muscle	CV	15577	A	G	3231	1	0.0003	somatic	D-loop	-	ti	D-loop	AAA	A>G	0	1	1
G133p3_Br	G129	G133	G133p3	pup	female	19	brain	CV	15581	C	T	4602	3	0.0007	somatic	D-loop	-	ti	D-loop	ACA	C>T	0	1	1
G136_M	G126	G136	G136	mother	female	299	muscle	CV	15588	C	T	755	1	0.0013	somatic	D-loop	-	ti	D-loop	ACT	C>T	1	0	1
G133_Br	G129	G133	G133	mother	female	308	brain	CV	15599	A	G	1763	1	0.0006	somatic	D-loop	-	ti	D-loop	AAG	A>G	0	1	1
G136_Br	G126	G136	G136	mother	female	299	brain	CV	15608	C	T	2441	1	0.0004	somatic	D-loop	-	ti	D-loop	TCT	C>T	1	0	1
G137p1_Br	G126	G137	G137p1	pup	male	17	brain	CV	15617	C	T	3506	1	0.0003	somatic	D-loop	-	ti	D-loop	TCT	C>T	1	0	1
G140_M	G126	G140	G140	mother	female	316	muscle	CV	15619	G	A	3546	3	0.0009	somatic	D-loop	-	ti	D-loop	TGA	G>A	1	0	1
G133_Br	G129	G133	G133	mother	female	308	brain	CV	15631	A	T	1779	1	0.0006	somatic	D-loop	-	tv	D-loop	TAC	A>T	0	1	1
G132p7_Br	G129	G132	G132p7	pup	female	21	brain	CV	15639	A	T	5412	1	0.0002	somatic	D-loop	-	tv	D-loop	TAA	A>T	0	1	1
G132p2_Br	G129	G132	G132p2	pup	male	19	brain	CV	15653	C	T	2351	1	0.0004	somatic	D-loop	-	ti	D-loop	CCA	C>T	0	1	1
G140_Br	G126	G140	G140	mother	female	316	brain	CV	15655	T	C	3200	1	0.0003	somatic	D-loop	-	ti	D-loop	ATA	T>C	1	0	1
G139_Br	G126	G139	G139	mother	female	316	brain	CV	15657	T	C	3780	1	0.0003	somatic	D-loop	-	ti	D-loop	ATG	T>C	1	0	1
G139_M	G126	G139	G139	mother	female	316	muscle	CV	15660	C	A	4513	1	0.0002	somatic	D-loop	-	tv	D-loop	ACT	C>A	1	0	1
G137p2_Oo_pool	G126	G137	G137p2	pup	female	17	oocyte pool	CV	15666	C	T	641	1	0.0016	germline	D-loop	-	ti	D-loop	CCC	C>T	1	0	1
G140_Br	G126	G140	G140	mother	female	316	brain	CV	15668	T	C	3193	1	0.0003	somatic	D-loop	-	ti	D-loop	CTT	T>C	1	0	1
G139p1_Br	G126	G139	G139p1	pup	female	18	brain	CV	15670	C	T	1305	1	0.0008	somatic	D-loop	-	ti	D-loop	TCC	C>T	1	0	1
G139_Br	G126	G139	G139	mother	female	316	brain	CV	15671	C	T	3763	1	0.0003	somatic	D-loop	-	ti	D-loop	CCC	C>T	1	0	1
G134_M	G129	G134	G134	mother	female	295	muscle	CV	15672	C	T	814	1	0.0012	somatic	D-loop	-	ti	D-loop	CCC	C>T	1	1	2
G140p6_Oo3	G126	G140	G140p6	pup	female	21	single oocyte	FS	15672	C	T	533	1	0.0019	germline	D-loop	-	ti	D-loop	CCC	C>T	1	1	2
G140_M	G126	G140	G140	mother	female	316	muscle	CV	15675	T	C	3462	1	0.0003	somatic	D-loop	-	ti	D-loop	ATT	T>C	1	0	1
G140p6_M	G126	G140	G140p6	pup	female	21	muscle	CV	15678	G	A	2068	1	0.0005	somatic	D-loop	-	ti	D-loop	TGG	G>A	1	0	1
G137_Oo2	G126	G137	G137	mother	female	320	single oocyte	FS	15678	G	T	842	1	0.0012	germline	D-loop	-	tv	D-loop	TGG	G>T	1	0	1
G139_Br	G126	G139	G139	mother	female	316	brain	CV	15679	G	A	3729	2	0.0005	somatic	D-loop	-	ti	D-loop	GGT	G>A	1	1	2
G133_Br	G129	G133	G133	mother	female	308	brain	CV	15679	G	A	1779	1	0.0006	somatic	D-loop	-	ti	D-loop	GGT	G>A	1	1	2
G132p9_Br	G129	G132	G132p9	pup	female	21	brain	CV	15680	T	C	1086	1	0.0009	somatic	D-loop	-	ti	D-loop	GTC	T>C	0	2	2
G132p4_M	G129	G132	G132p4	pup	female	19	muscle	CV	15680	T	C	1328	1	0.0008	somatic	D-loop	-	ti	D-loop	GTC	T>C	0	2	2
G137p4_Br	G126	G137	G137p4	pup	male	18	brain	CV	15682	T	C	2581	1	0.0004	somatic	D-loop	-	ti	D-loop	CTA	T>C	2	0	2
G137_Oo3	G126	G137	G137	mother	female	320	single oocyte	FS	15682	T	C	65	1	0.0154	germline	D-loop	-	ti	D-loop	CTA	T>C	2	0	2
G131_Br	G129	G131	G131	mother	female	291	brain	CV	15699	C	T	2055	1	0.0005	somatic	D-loop	-	ti	D-loop	TCC	C>T	1	1	2
G137_Br	G126	G137	G137	mother	female	320	brain	CV	15699	C	T	1601	1	0.0006	somatic	D-loop	-	ti	D-loop	TCC	C>T	1	1	2
G137_Br	G126	G137	G137	mother	female	320	brain	CV	15707	C	T	1610	1	0.0006	somatic	D-loop	-	ti	D-loop	ACC	C>T	1	0	1
G140p7_Oo3	G126	G140	G140p7	pup	female	21	single oocyte	FS	15708	C	G	424	1	0.0024	germline	D-loop	-	tv	D-loop	CCA	C>G	1	0	1
G140_M	G126	G140	G140	mother	female	316	muscle	CV	15715	C	T	3439	1	0.0003	somatic	D-loop	-	ti	D-loop	CCC	C>T	1	0	1
G136_Br	G126	G136	G136	mother	female	299	brain	CV	15717	G	A	2549	1	0.0004	somatic	D-loop	-	ti	D-loop	CGC	CpG>CpA	1	0	1
G133_M	G129	G133	G133	mother	female	308	muscle	CV	15719	C	T	2747	1	0.0004	somatic	D-loop	-	ti	D-loop	CCC	C>T	0	1	1
G132_Br	G129	G132	G132	mother	female	312	brain	CV	15722	C	T	853	1	0.0012	somatic	D-loop	-	ti	D-loop	ACC	C>T	0	1	1
G140_Br	G126	G140	G140	mother	female	316	brain	CV	15723	C	T	3165	1	0.0003	somatic	D-loop	-	ti	D-loop	CCA	C>T	1	0	1
G140_Br	G126	G140	G140	mother	female	316	brain	CV	15727	G	A	3161	1	0.0003	somatic	D-loop	-	ti	D-loop	TGC	G>A	1	2	3
G133_M	G129	G133	G133	mother	female	308	muscle	CV	15727	G	A	2735	1	0.0004	somatic	D-loop	-	ti	D-loop	TGC	G>A	1	2	3
G133p1_M	G129	G133	G133p1	pup	male	19	muscle	CV	15727	G	A	1037	1	0.001	somatic	D-loop	-	ti	D-loop	TGC	G>A	1	2	3
G133_M	G129	G133	G133	mother	female	308	muscle	CV	15731	C	T	2769	1	0.0004	somatic	D-loop	-	ti	D-loop	CCT	C>T	0	1	1
G132p8_Br	G129	G132	G132p8	pup	female	21	brain	CV	15733	C	T	3347	1	0.0003	somatic	D-loop	-	ti	D-loop	TCT	C>T	1	1	2
G140_Br	G126	G140	G140	mother	female	316	brain	CV	15733	C	T	3173	1	0.0003	somatic	D-loop	-	ti	D-loop	TCT	C>T	1	1	2
G139_M	G126	G139	G139	mother	female	316	muscle	CV	15738	C	T	4468	1	0.0002	somatic	D-loop	-	ti	D-loop	TCG	CpG>TpG	2	0	2
G140p7_Oo3	G126	G140	G140p7	pup	female	21	single oocyte	FS	15738	C	T	428	1	0.0023	germline	D-loop	-	ti	D-loop	TCG	CpG>TpG	2	0	2
G140_M	G126	G140	G140	mother	female	316	muscle	CV	15742	C	T	3339	2	0.0006	somatic	D-loop	-	ti	D-loop	TCC	C>T	2	1	3
G131_Br	G129	G131	G131	mother	female	291	brain	CV	15742	C	T	2005	2	0.001	somatic	D-loop	-	ti	D-loop	TCC	C>T	2	1	3
G140p5_Br	G126	G140	G140p5	pup	female	21	brain	CV	15742	C	T	2460	1	0.0004	somatic	D-loop	-	ti	D-loop	TCC	C>T	2	1	3
G132_M	G129	G132	G132	mother	female	312	muscle	CV	15747	C	T	2948	1	0.0003	somatic	D-loop	-	ti	D-loop	GCC	C>T	0	1	1
G134_M	G129	G134	G134	mother	female	295	muscle	CV	15748	C	T	861	1	0.0012	somatic	D-loop	-	ti	D-loop	CCC	C>T	0	1	1
G131_Br	G129	G131	G131	mother	female	291	brain	CV	15756	C	T	1967	1	0.0005	somatic	D-loop	-	ti	D-loop	ACT	C>T	0	1	1
G133_M	G129	G133	G133	mother	female	308	muscle	CV	15757	T	C	2677	1	0.0004	somatic	D-loop	-	ti	D-loop	CTT	T>C	0	1	1
G137p3_Br	G126	G137	G137p3	pup	female	17	brain	CV	15759	G	A	987	1	0.001	somatic	D-loop	-	ti	D-loop	TGG	G>A	1	0	1
G133p3_Br	G129	G133	G133p3	pup	female	19	brain	CV	15761	G	A	4251	1	0.0002	somatic	D-loop	-	ti	D-loop	GGG	G>A	1	1	2
G136_Oo6	G126	G136	G136	mother	female	299	single oocyte	FS	15761	G	A	919	1	0.0011	germline	D-loop	-	ti	D-loop	GGG	G>A	1	1	2
G137p3_Oo_pool	G126	G137	G137p3	pup	female	17	oocyte pool	CV	15766	G	C	1263	1	0.0008	germline	D-loop	-	tv	D-loop	AGC	G>C	1	0	1
G132_M	G129	G132	G132	mother	female	312	muscle	CV	15771	A	G	2788	1	0.0004	somatic	D-loop	-	ti	D-loop	AAC	A>G	0	1	1
G133p4_M	G129	G133	G133p4	pup	female	19	muscle	CV	15772	C	A	2568	1	0.0004	somatic	D-loop	-	tv	D-loop	ACT	C>A	0	1	1
G140_Br	G126	G140	G140	mother	female	316	brain	CV	15772	C	T	3028	1	0.0003	somatic	D-loop	-	ti	D-loop	ACT	C>T	1	0	1
G137p2_Oo3	G126	G137	G137p2	pup	female	17	single oocyte	FS	15774	G	A	529	1	0.0019	germline	D-loop	-	ti	D-loop	TGA	G>A	1	0	1
G137_Br	G126	G137	G137	mother	female	320	brain	CV	15794	G	A	1544	1	0.0007	somatic	D-loop	-	ti	D-loop	GGT	G>A	1	0	1
G133_M	G129	G133	G133	mother	female	308	muscle	CV	15797	C	T	2525	1	0.0004	somatic	D-loop	-	ti	D-loop	TCT	C>T	0	1	1
G137_Br	G126	G137	G137	mother	female	320	brain	CV	15806	G	A	1557	1	0.0006	somatic	D-loop	-	ti	D-loop	AGG	G>A	2	0	2
G140_Br	G126	G140	G140	mother	female	316	brain	CV	15806	G	A	2949	1	0.0003	somatic	D-loop	-	ti	D-loop	AGG	G>A	2	0	2
G132_M	G129	G132	G132	mother	female	312	muscle	CV	15809	C	T	2639	1	0.0004	somatic	D-loop	-	ti	D-loop	GCC	C>T	1	1	2
G136_M	G126	G136	G136	mother	female	299	muscle	CV	15809	C	T	848	1	0.0012	somatic	D-loop	-	ti	D-loop	GCC	C>T	1	1	2
G132_M	G129	G132	G132	mother	female	312	muscle	CV	15819	C	T	2621	1	0.0004	somatic	D-loop	-	ti	D-loop	GCG	CpG>TpG	0	1	1
G133_M	G129	G133	G133	mother	female	308	muscle	CV	15826	G	A	2492	1	0.0004	somatic	D-loop	-	ti	D-loop	CGC	CpG>CpA	0	1	1
G140_M	G126	G140	G140	mother	female	316	muscle	CV	15827	C	T	3155	2	0.0006	somatic	D-loop	-	ti	D-loop	GCC	C>T	2	0	2
G137_M	G126	G137	G137	mother	female	320	muscle	CV	15827	C	T	2466	1	0.0004	somatic	D-loop	-	ti	D-loop	GCC	C>T	2	0	2
G133_M	G129	G133	G133	mother	female	308	muscle	CV	15833	C	T	2505	2	0.0008	somatic	D-loop	-	ti	D-loop	ACG	CpG>TpG	1	1	2
G136_M	G126	G136	G136	mother	female	299	muscle	CV	15833	C	T	844	1	0.0012	somatic	D-loop	-	ti	D-loop	ACG	CpG>TpG	1	1	2
G137p2_Oo1	G126	G137	G137p2	pup	female	17	single oocyte	CV	15834	G	C	669	1	0.0015	germline	D-loop	-	tv	D-loop	CGT	G>C	1	0	1
G132p1_Br	G129	G132	G132p1	pup	male	19	brain	CV	15836	T	C	1407	1	0.0007	somatic	D-loop	-	ti	D-loop	TTC	T>C	0	1	1
G140p1_Br	G126	G140	G140p1	pup	male	21	brain	CV	15837	C	T	4096	1	0.0002	somatic	D-loop	-	ti	D-loop	TCC	C>T	1	0	1
G132p9_Oo_pool	G129	G132	G132p9	pup	female	21	oocyte pool	CV	15840	C	A	2941	1	0.0003	germline	D-loop	-	tv	D-loop	CCT	C>A	0	1	1
G140_Br	G126	G140	G140	mother	female	316	brain	CV	15857	G	A	2943	1	0.0003	somatic	D-loop	-	ti	D-loop	CGA	CpG>CpA	1	0	1
G137p5_M	G126	G137	G137p5	pup	female	18	muscle	CV	15857	G	C	2967	1	0.0003	somatic	D-loop	-	tv	D-loop	CGA	G>C	1	0	1
G133p4_M	G129	G133	G133p4	pup	female	19	muscle	CV	15863	A	G	2443	1	0.0004	somatic	D-loop	-	ti	D-loop	TAT	A>G	0	1	1
G132p3_M	G129	G132	G132p3	pup	female	19	muscle	CV	15864	T	C	1756	1	0.0006	somatic	D-loop	-	ti	D-loop	ATC	T>C	0	1	1
G139p1_Oo_pool	G126	G139	G139p1	pup	female	18	oocyte pool	CV	15865	C	T	301	1	0.0033	germline	D-loop	-	ti	D-loop	TCG	CpG>TpG	1	0	1
G133_M	G129	G133	G133	mother	female	308	muscle	CV	15868	G	A	2412	1	0.0004	somatic	D-loop	-	ti	D-loop	GGT	G>A	0	1	1
G139p1_Br	G126	G139	G139p1	pup	female	18	brain	CV	15878	C	T	1039	1	0.001	somatic	D-loop	-	ti	D-loop	GCC	C>T	1	0	1
G139_Br	G126	G139	G139	mother	female	316	brain	CV	15885	C	T	3234	1	0.0003	somatic	D-loop	-	ti	D-loop	ACC	C>T	1	0	1
G136_Br	G126	G136	G136	mother	female	299	brain	CV	15886	C	T	2514	1	0.0004	somatic	D-loop	-	ti	D-loop	CCA	C>T	1	0	1
G139_M	G126	G139	G139	mother	female	316	muscle	CV	15894	C	A	4047	1	0.0003	somatic	D-loop	-	tv	D-loop	ACT	C>A	1	0	1
G137_Br	G126	G137	G137	mother	female	320	brain	CV	15898	G	A	1532	1	0.0007	somatic	D-loop	-	ti	D-loop	TGG	G>A	1	0	1
G131_Br	G129	G131	G131	mother	female	291	brain	CV	15901	G	A	1874	1	0.0005	somatic	D-loop	-	ti	D-loop	TGT	G>A	1	2	3
G132p9_M	G129	G132	G132p9	pup	female	21	muscle	CV	15901	G	A	1132	1	0.0009	somatic	D-loop	-	ti	D-loop	TGT	G>A	1	2	3
G139_M	G126	G139	G139	mother	female	316	muscle	CV	15901	G	A	3967	1	0.0003	somatic	D-loop	-	ti	D-loop	TGT	G>A	1	2	3
G133p2_M	G129	G133	G133p2	pup	male	19	muscle	CV	15903	C	T	835	1	0.0012	somatic	D-loop	-	ti	D-loop	TCA	C>T	0	1	1
G140_M	G126	G140	G140	mother	female	316	muscle	CV	15905	T	C	3035	1	0.0003	somatic	D-loop	-	ti	D-loop	ATG	T>C	1	0	1
G140_Br	G126	G140	G140	mother	female	316	brain	CV	15912	G	A	2759	1	0.0004	somatic	D-loop	-	ti	D-loop	TGG	G>A	1	0	1
G139_Oo2	G126	G139	G139	mother	female	316	single oocyte	FS	15912	G	T	593	1	0.0017	germline	D-loop	-	tv	D-loop	TGG	G>T	1	0	1
G134_Oo1	G129	G134	G134	mother	female	295	single oocyte	CV	15913	G	A	935	1	0.0011	germline	D-loop	-	ti	D-loop	GGT	G>A	0	1	1
G140p1_M	G126	G140	G140p1	pup	male	21	muscle	CV	15917	C	T	3810	1	0.0003	somatic	D-loop	-	ti	D-loop	TCT	C>T	2	0	2
G137p2_Oo4	G126	G137	G137p2	pup	female	17	single oocyte	FS	15917	C	T	394	1	0.0025	germline	D-loop	-	ti	D-loop	TCT	C>T	2	0	2
G132p3_Oo_pool	G129	G132	G132p3	pup	female	19	oocyte pool	CV	15922	T	C	135	1	0.0074	germline	D-loop	-	ti	D-loop	TTA	T>C	0	1	1
G140p1_Br	G126	G140	G140p1	pup	male	21	brain	CV	15924	T	C	3781	1	0.0003	somatic	D-loop	-	ti	D-loop	ATT	T>C	1	0	1
G137_Br	G126	G137	G137	mother	female	320	brain	CV	15929	G	A	1429	1	0.0007	somatic	D-loop	-	ti	D-loop	GGC	G>A	1	0	1
G140_Oo_pool	G126	G140	G140	mother	female	316	oocyte pool	CV	15930	C	T	252	4	0.0159	germline	D-loop	-	ti	D-loop	GCC	C>T	1	1	2
G132_Oo3	G129	G132	G132	mother	female	312	single oocyte	FS	15930	C	T	346	1	0.0029	germline	D-loop	-	ti	D-loop	GCC	C>T	1	1	2
G137p3_M	G126	G137	G137p3	pup	female	17	muscle	CV	15931	C	T	1038	1	0.001	somatic	D-loop	-	ti	D-loop	CCT	C>T	1	0	1
G132_M	G129	G132	G132	mother	female	312	muscle	CV	15938	C	T	2248	1	0.0004	somatic	D-loop	-	ti	D-loop	TCA	C>T	0	1	1
G136_Br	G126	G136	G136	mother	female	299	brain	CV	15944	C	T	2350	1	0.0004	somatic	D-loop	-	ti	D-loop	ACA	C>T	1	0	1
G133_Br	G129	G133	G133	mother	female	308	brain	CV	15949	C	T	1811	1	0.0006	somatic	D-loop	-	ti	D-loop	GCC	C>T	0	1	1
G137p2_M	G126	G137	G137p2	pup	female	17	muscle	CV	15951	G	T	1991	1	0.0005	somatic	D-loop	-	tv	D-loop	CGT	G>T	1	0	1
G140_M	G126	G140	G140	mother	female	316	muscle	CV	15965	G	A	3076	1	0.0003	somatic	D-loop	-	ti	D-loop	AGG	G>A	1	0	1
G132p2_Br	G129	G132	G132p2	pup	male	19	brain	CV	15966	G	A	1990	1	0.0005	somatic	D-loop	-	ti	D-loop	GGA	G>A	0	2	2
G131p2_M	G129	G131	G131p2	pup	male	18	muscle	CV	15966	G	A	2127	1	0.0005	somatic	D-loop	-	ti	D-loop	GGA	G>A	0	2	2
G137_Oo4	G126	G137	G137	mother	female	320	single oocyte	FS	15970	G	A	1477	1	0.0007	germline	D-loop	-	ti	D-loop	AGC	G>A	1	1	2
G132p6_Oo_pool	G129	G132	G132p6	pup	female	21	oocyte pool	CV	15970	G	A	1996	1	0.0005	germline	D-loop	-	ti	D-loop	AGC	G>A	1	1	2
G140_Br	G126	G140	G140	mother	female	316	brain	CV	15979	C	T	2719	1	0.0004	somatic	D-loop	-	ti	D-loop	TCT	C>T	1	0	1
G137p2_Br	G126	G137	G137p2	pup	female	17	brain	CV	15982	G	A	3063	1	0.0003	somatic	D-loop	-	ti	D-loop	AGA	G>A	1	1	2
G131p3_M	G129	G131	G131p3	pup	female	18	muscle	CV	15982	G	A	2801	1	0.0004	somatic	D-loop	-	ti	D-loop	AGA	G>A	1	1	2
G132_M	G129	G132	G132	mother	female	312	muscle	CV	15984	C	T	2157	1	0.0005	somatic	D-loop	-	ti	D-loop	ACG	CpG>TpG	1	1	2
G139_M	G126	G139	G139	mother	female	316	muscle	CV	15984	C	T	3826	1	0.0003	somatic	D-loop	-	ti	D-loop	ACG	CpG>TpG	1	1	2
G140p7_Br	G126	G140	G140p7	pup	female	21	brain	CV	15985	G	T	1343	1	0.0007	somatic	D-loop	-	tv	D-loop	CGC	G>T	1	0	1
G139_Br	G126	G139	G139	mother	female	316	brain	CV	15992	C	T	3047	1	0.0003	somatic	D-loop	-	ti	D-loop	ACG	CpG>TpG	1	0	1
G137p2_Oo2	G126	G137	G137p2	pup	female	17	single oocyte	FS	15996	G	T	94	1	0.0106	germline	D-loop	-	tv	D-loop	TGA	G>T	1	0	1
G132p5_Oo1	G129	G132	G132p5	pup	female	21	single oocyte	FS	15999	G	A	355	3	0.0085	germline	D-loop	-	ti	D-loop	AGA	G>A	1	1	2
G137p3_M	G126	G137	G137p3	pup	female	17	muscle	CV	15999	G	A	1061	1	0.0009	somatic	D-loop	-	ti	D-loop	AGA	G>A	1	1	2
G137_Br	G126	G137	G137	mother	female	320	brain	CV	16003	C	T	1441	1	0.0007	somatic	D-loop	-	ti	D-loop	TCA	C>T	2	0	2
G140_Br	G126	G140	G140	mother	female	316	brain	CV	16003	C	T	2700	1	0.0004	somatic	D-loop	-	ti	D-loop	TCA	C>T	2	0	2
G132p5_Oo_pool	G129	G132	G132p5	pup	female	21	oocyte pool	CV	16013	C	A	1946	1	0.0005	germline	D-loop	-	tv	D-loop	GCA	C>A	0	1	1
G137p2_Oo1	G126	G137	G137p2	pup	female	17	single oocyte	CV	16017	A	C	661	1	0.0015	germline	D-loop	-	tv	D-loop	AAC	A>C	1	0	1
G132p9_Br	G129	G132	G132p9	pup	female	21	brain	CV	16018	C	T	982	1	0.001	somatic	D-loop	-	ti	D-loop	ACC	C>T	0	1	1
G139_Br	G126	G139	G139	mother	female	316	brain	CV	16019	C	T	2969	1	0.0003	somatic	D-loop	-	ti	D-loop	CCC	C>T	1	0	1
G137p3_Oo7	G126	G137	G137p3	pup	female	17	single oocyte	FS	16024	C	T	107	1	0.0094	germline	D-loop	-	ti	D-loop	TCA	C>T	1	0	1
G131_Br	G129	G131	G131	mother	female	291	brain	CV	16027	C	T	1758	1	0.0006	somatic	D-loop	-	ti	D-loop	CCT	C>T	0	1	1
G140p6_Br	G126	G140	G140p6	pup	female	21	brain	CV	16028	T	C	3924	1	0.0003	somatic	D-loop	-	ti	D-loop	CTA	T>C	1	1	2
G133_M	G129	G133	G133	mother	female	308	muscle	CV	16028	T	C	2332	1	0.0004	somatic	D-loop	-	ti	D-loop	CTA	T>C	1	1	2
G131p3_M	G129	G131	G131p3	pup	female	18	muscle	CV	16031	G	A	2698	1	0.0004	somatic	D-loop	-	ti	D-loop	AGG	G>A	1	2	3
G134_M	G129	G134	G134	mother	female	295	muscle	CV	16031	G	A	821	1	0.0012	somatic	D-loop	-	ti	D-loop	AGG	G>A	1	2	3
G137_Oo2	G126	G137	G137	mother	female	320	single oocyte	FS	16031	G	A	813	1	0.0012	germline	D-loop	-	ti	D-loop	AGG	G>A	1	2	3
G137p3_Oo_pool	G126	G137	G137p3	pup	female	17	oocyte pool	CV	16033	C	A	1181	1	0.0009	germline	D-loop	-	tv	D-loop	GCT	C>A	1	0	1
G136_M	G126	G136	G136	mother	female	299	muscle	CV	16036	A	G	835	1	0.0012	somatic	D-loop	-	ti	D-loop	AAT	A>G	2	0	2
G140_M	G126	G140	G140	mother	female	316	muscle	CV	16036	A	G	3009	1	0.0003	somatic	D-loop	-	ti	D-loop	AAT	A>G	2	0	2
G140_Br	G126	G140	G140	mother	female	316	brain	CV	16037	T	C	2614	1	0.0004	somatic	D-loop	-	ti	D-loop	ATT	T>C	1	0	1
G139_M	G126	G139	G139	mother	female	316	muscle	CV	16042	C	T	3653	1	0.0003	somatic	D-loop	-	ti	D-loop	TCA	C>T	2	0	2
G139p2_M	G126	G139	G139p2	pup	female	18	muscle	CV	16042	C	T	1286	1	0.0008	somatic	D-loop	-	ti	D-loop	TCA	C>T	2	0	2
G140p6_M	G126	G140	G140p6	pup	female	21	muscle	CV	16046	C	T	1774	1	0.0006	somatic	D-loop	-	ti	D-loop	GCT	C>T	1	1	2
G133_Oo4	G129	G133	G133	mother	female	308	single oocyte	FS	16046	C	T	212	1	0.0047	germline	D-loop	-	ti	D-loop	GCT	C>T	1	1	2
G136_Oo_pool	G126	G136	G136	mother	female	299	oocyte pool	CV	16049	G	A	2315	1	0.0004	germline	D-loop	-	ti	D-loop	TGT	G>A	1	0	1
G139_M	G126	G139	G139	mother	female	316	muscle	CV	16061	T	C	3535	1	0.0003	somatic	D-loop	-	ti	D-loop	ATG	T>C	1	0	1
G132p4_M	G129	G132	G132p4	pup	female	19	muscle	CV	16066	C	T	914	1	0.0011	somatic	D-loop	-	ti	D-loop	ACT	C>T	0	1	1
G139_Oo4	G126	G139	G139	mother	female	316	single oocyte	FS	16067	T	C	1192	2	0.0017	germline	D-loop	-	ti	D-loop	CTC	T>C	1	0	1
G132p2_M	G129	G132	G132p2	pup	male	19	muscle	CV	16094	C	G	2389	1	0.0004	somatic	D-loop	-	tv	D-loop	CCC	C>G	0	1	1
G132p2_M	G129	G132	G132p2	pup	male	19	muscle	CV	16097	C	T	2394	1	0.0004	somatic	D-loop	-	ti	D-loop	CCC	C>T	0	1	1
G134p7_Br	G129	G134	G134p7	pup	female	18	brain	CV	16099	A	G	1013	1	0.001	somatic	D-loop	-	ti	D-loop	CAC	A>G	0	2	2
G132p1_M	G129	G132	G132p1	pup	male	19	muscle	CV	16099	A	G	1330	1	0.0008	somatic	D-loop	-	ti	D-loop	CAC	A>G	0	2	2
[truncated: 164 more rows]
